# Supplementary material for: Design of a hazard prediction system with intelligent multimodal fusion based on artificial intelligence & internet of things technology: taking a crib as an example
Source: PeerJ journal article supplement (doi:10.7717/peerj-cs.2404), 2024-10-29
Supplement: Data.zip [file turning-over1.xlsx]

## Sheet: Sheet
Timestamp	RunTime	BabyStatus	Buzzer
1.71308e+09	0	Normal	Non
1.71308e+09	0.04	Turn over	Ring
1.71308e+09	0.08	Turn over	Ring
1.71308e+09	0.12	Normal	Non
1.71308e+09	0.16	Turn over	Ring
1.71308e+09	0.19	Turn over	Ring
1.71308e+09	0.22	Normal	Non
1.71308e+09	0.25	Normal	Non
1.71308e+09	0.28	Normal	Non
1.71308e+09	0.33	Normal	Non
1.71308e+09	0.36	Normal	Non
1.71308e+09	0.39	Normal	Non
1.71308e+09	0.42	Turn over	Ring
1.71308e+09	0.47	Normal	Non
1.71308e+09	0.5	Normal	Non
1.71308e+09	0.53	Normal	Non
1.71308e+09	0.57	Normal	Non
1.71308e+09	0.6	Normal	Non
1.71308e+09	0.63	Normal	Non
1.71308e+09	0.66	Normal	Non
1.71308e+09	0.69	Normal	Non
1.71308e+09	0.73	Normal	Non
1.71308e+09	0.76	Normal	Non
1.71308e+09	0.8	Normal	Non
1.71308e+09	0.83	Normal	Non
1.71308e+09	0.86	Normal	Non
1.71308e+09	0.89	Normal	Non
1.71308e+09	0.92	Normal	Non
1.71308e+09	0.95	Normal	Non
1.71308e+09	0.98	Normal	Non
1.71308e+09	1.01	Normal	Non
1.71308e+09	1.05	Normal	Non
1.71308e+09	1.08	Normal	Non
1.71308e+09	1.11	Normal	Non
1.71308e+09	1.14	Normal	Non
1.71308e+09	1.19	Normal	Non
1.71308e+09	1.22	Normal	Non
1.71308e+09	1.26	Normal	Non
1.71308e+09	1.29	Normal	Non
1.71308e+09	1.33	Normal	Non
1.71308e+09	1.37	Normal	Non
1.71308e+09	1.4	Normal	Non
1.71308e+09	1.44	Normal	Non
1.71308e+09	1.47	Normal	Non
1.71308e+09	1.51	Normal	Non
1.71308e+09	1.56	Normal	Non
1.71308e+09	1.59	Normal	Non
1.71308e+09	1.62	Normal	Non
1.71308e+09	1.66	Normal	Non
1.71308e+09	1.68	Normal	Non
1.71308e+09	1.72	Normal	Non
1.71308e+09	1.75	Normal	Non
1.71308e+09	1.79	Normal	Non
1.71308e+09	1.83	Normal	Non
1.71308e+09	1.87	Normal	Non
1.71308e+09	1.91	Normal	Non
1.71308e+09	1.95	Normal	Non
1.71308e+09	2	Normal	Non
1.71308e+09	2.03	Normal	Non
1.71308e+09	2.08	Normal	Non
1.71308e+09	2.11	Normal	Non
1.71308e+09	2.15	Normal	Non
1.71308e+09	2.2	Normal	Non
1.71308e+09	2.24	Normal	Non
1.71308e+09	2.29	Normal	Non
1.71308e+09	2.32	Normal	Non
1.71308e+09	2.35	Normal	Non
1.71308e+09	2.39	Normal	Non
1.71308e+09	2.43	Normal	Non
1.71308e+09	2.46	Normal	Non
1.71308e+09	2.49	Normal	Non
1.71308e+09	2.53	Normal	Non
1.71308e+09	2.57	Normal	Non
1.71308e+09	2.61	Normal	Non
1.71308e+09	2.65	Normal	Non
1.71308e+09	2.68	Normal	Non
1.71308e+09	2.73	Normal	Non
1.71308e+09	2.77	Normal	Non
1.71308e+09	2.81	Normal	Non
1.71308e+09	2.84	Normal	Non
1.71308e+09	2.87	Normal	Non
1.71308e+09	2.9	Normal	Non
1.71308e+09	2.93	Normal	Non
1.71308e+09	2.96	Normal	Non
1.71308e+09	2.99	Normal	Non
1.71308e+09	3.02	Normal	Non
1.71308e+09	3.06	Normal	Non
1.71308e+09	3.1	Normal	Non
1.71308e+09	3.14	Normal	Non
1.71308e+09	3.17	Normal	Non
1.71308e+09	3.2	Normal	Non
1.71308e+09	3.25	Normal	Non
1.71308e+09	3.28	Normal	Non
1.71308e+09	3.32	Normal	Non
1.71308e+09	3.35	Normal	Non
1.71308e+09	3.39	Normal	Non
1.71308e+09	3.42	Normal	Non
1.71308e+09	3.47	Normal	Non
1.71308e+09	3.51	Normal	Non
1.71308e+09	3.56	Normal	Non
1.71308e+09	3.61	Normal	Non
1.71308e+09	3.64	Normal	Non
1.71308e+09	3.69	Normal	Non
1.71308e+09	3.73	Normal	Non
1.71308e+09	3.78	Normal	Non
1.71308e+09	3.82	Normal	Non
1.71308e+09	3.85	Normal	Non
1.71308e+09	3.89	Normal	Non
1.71308e+09	3.93	Normal	Non
1.71308e+09	3.97	Normal	Non
1.71308e+09	4.01	Normal	Non
1.71308e+09	4.04	Normal	Non
1.71308e+09	4.08	Normal	Non
1.71308e+09	4.12	Normal	Non
1.71308e+09	4.15	Normal	Non
1.71308e+09	4.2	Normal	Non
1.71308e+09	4.23	Normal	Non
1.71308e+09	4.28	Normal	Non
1.71308e+09	4.32	Normal	Non
1.71308e+09	4.37	Normal	Non
1.71308e+09	4.4	Normal	Non
1.71308e+09	4.43	Normal	Non
1.71308e+09	4.46	Normal	Non
1.71308e+09	4.5	Normal	Non
1.71308e+09	4.54	Normal	Non
1.71308e+09	4.57	Normal	Non
1.71308e+09	4.62	Normal	Non
1.71308e+09	4.65	Normal	Non
1.71308e+09	4.68	Normal	Non
1.71308e+09	4.71	Normal	Non
1.71308e+09	4.74	Normal	Non
1.71308e+09	4.77	Normal	Non
1.71308e+09	4.8	Normal	Non
1.71308e+09	4.83	Normal	Non
1.71308e+09	4.88	Normal	Non
1.71308e+09	4.91	Normal	Non
1.71308e+09	4.94	Normal	Non
1.71308e+09	4.97	Normal	Non
1.71308e+09	5	Normal	Non
1.71308e+09	5.03	Normal	Non
1.71308e+09	5.07	Normal	Non
1.71308e+09	5.1	Normal	Non
1.71308e+09	5.14	Normal	Non
1.71308e+09	5.18	Normal	Non
1.71308e+09	5.21	Normal	Non
1.71308e+09	5.25	Normal	Non
1.71308e+09	5.28	Normal	Non
1.71308e+09	5.31	Normal	Non
1.71308e+09	5.34	Normal	Non
1.71308e+09	5.38	Normal	Non
1.71308e+09	5.41	Normal	Non
1.71308e+09	5.45	Normal	Non
1.71308e+09	5.49	Normal	Non
1.71308e+09	5.52	Normal	Non
1.71308e+09	5.57	Normal	Non
1.71308e+09	5.6	Normal	Non
1.71308e+09	5.63	Normal	Non
1.71308e+09	5.66	Normal	Non
1.71308e+09	5.69	Normal	Non
1.71308e+09	5.72	Normal	Non
1.71308e+09	5.75	Normal	Non
1.71308e+09	5.79	Normal	Non
1.71308e+09	5.83	Normal	Non
1.71308e+09	5.86	Normal	Non
1.71308e+09	5.9	Normal	Non
1.71308e+09	5.93	Normal	Non
1.71308e+09	5.96	Normal	Non
1.71308e+09	5.99	Normal	Non
1.71308e+09	6.02	Normal	Non
1.71308e+09	6.05	Normal	Non
1.71308e+09	6.08	Normal	Non
1.71308e+09	6.13	Normal	Non
1.71308e+09	6.16	Normal	Non
1.71308e+09	6.19	Normal	Non
1.71308e+09	6.24	Normal	Non
1.71308e+09	6.27	Normal	Non
1.71308e+09	6.3	Normal	Non
1.71308e+09	6.33	Normal	Non
1.71308e+09	6.36	Normal	Non
1.71308e+09	6.39	Normal	Non
1.71308e+09	6.42	Normal	Non
1.71308e+09	6.46	Normal	Non
1.71308e+09	6.49	Normal	Non
1.71308e+09	6.53	Normal	Non
1.71308e+09	6.56	Normal	Non
1.71308e+09	6.59	Normal	Non
1.71308e+09	6.63	Normal	Non
1.71308e+09	6.66	Normal	Non
1.71308e+09	6.69	Normal	Non
1.71308e+09	6.72	Normal	Non
1.71308e+09	6.75	Normal	Non
1.71308e+09	6.78	Normal	Non
1.71308e+09	6.83	Normal	Non
1.71308e+09	6.86	Normal	Non
1.71308e+09	6.89	Normal	Non
1.71308e+09	6.92	Normal	Non
1.71308e+09	6.95	Normal	Non
1.71308e+09	6.98	Normal	Non
1.71308e+09	7.02	Normal	Non
1.71308e+09	7.05	Normal	Non
1.71308e+09	7.08	Normal	Non
1.71308e+09	7.11	Normal	Non
1.71308e+09	7.14	Normal	Non
1.71308e+09	7.17	Normal	Non
1.71308e+09	7.21	Normal	Non
1.71308e+09	7.24	Normal	Non
1.71308e+09	7.27	Normal	Non
1.71308e+09	7.3	Normal	Non
1.71308e+09	7.33	Normal	Non
1.71308e+09	7.36	Normal	Non
1.71308e+09	7.39	Normal	Non
1.71308e+09	7.43	Normal	Non
1.71308e+09	7.47	Normal	Non
1.71308e+09	7.5	Normal	Non
1.71308e+09	7.54	Normal	Non
1.71308e+09	7.57	Normal	Non
1.71308e+09	7.6	Normal	Non
1.71308e+09	7.65	Normal	Non
1.71308e+09	7.69	Normal	Non
1.71308e+09	7.72	Normal	Non
1.71308e+09	7.75	Normal	Non
1.71308e+09	7.78	Normal	Non
1.71308e+09	7.83	Normal	Non
1.71308e+09	7.86	Normal	Non
1.71308e+09	7.91	Normal	Non
1.71308e+09	7.96	Normal	Non
1.71308e+09	8	Normal	Non
1.71308e+09	8.03	Normal	Non
1.71308e+09	8.07	Normal	Non
1.71308e+09	8.11	Normal	Non
1.71308e+09	8.14	Normal	Non
1.71308e+09	8.19	Normal	Non
1.71308e+09	8.22	Normal	Non
1.71308e+09	8.26	Normal	Non
1.71308e+09	8.3	Normal	Non
1.71308e+09	8.35	Normal	Non
1.71308e+09	8.39	Normal	Non
1.71308e+09	8.44	Normal	Non
1.71308e+09	8.48	Normal	Non
1.71308e+09	8.52	Normal	Non
1.71308e+09	8.56	Normal	Non
1.71308e+09	8.6	Normal	Non
1.71308e+09	8.64	Normal	Non
1.71308e+09	8.7	Normal	Non
1.71308e+09	8.73	Normal	Non
1.71308e+09	8.77	Normal	Non
1.71308e+09	8.8	Normal	Non
1.71308e+09	8.83	Normal	Non
1.71308e+09	8.87	Normal	Non
1.71308e+09	8.91	Normal	Non
1.71308e+09	8.95	Normal	Non
1.71308e+09	9	Normal	Non
1.71308e+09	9.05	Normal	Non
1.71308e+09	9.1	Normal	Non
1.71308e+09	9.14	Normal	Non
1.71308e+09	9.19	Normal	Non
1.71308e+09	9.23	Normal	Non
1.71308e+09	9.27	Normal	Non
1.71308e+09	9.31	Normal	Non
1.71308e+09	9.36	Normal	Non
1.71308e+09	9.41	Normal	Non
1.71308e+09	9.44	Normal	Non
1.71308e+09	9.48	Normal	Non
1.71308e+09	9.52	Normal	Non
1.71308e+09	9.55	Normal	Non
1.71308e+09	9.58	Normal	Non
1.71308e+09	9.63	Normal	Non
1.71308e+09	9.67	Normal	Non
1.71308e+09	9.71	Normal	Non
1.71308e+09	9.75	Normal	Non
1.71308e+09	9.79	Turn over	Ring
1.71308e+09	9.83	Normal	Non
1.71308e+09	9.88	Normal	Non
1.71308e+09	9.92	Normal	Non
1.71308e+09	9.97	Normal	Non
1.71308e+09	10.02	Normal	Non
1.71308e+09	10.06	Normal	Non
1.71308e+09	10.11	Normal	Non
1.71308e+09	10.14	Normal	Non
1.71308e+09	10.19	Normal	Non
1.71308e+09	10.23	Normal	Non
1.71308e+09	10.28	Normal	Non
1.71308e+09	10.33	Normal	Non
1.71308e+09	10.37	Normal	Non
1.71308e+09	10.4	Normal	Non
1.71308e+09	10.43	Normal	Non
1.71308e+09	10.47	Normal	Non
1.71308e+09	10.51	Normal	Non
1.71308e+09	10.54	Normal	Non
1.71308e+09	10.59	Normal	Non
1.71308e+09	10.64	Normal	Non
1.71308e+09	10.68	Normal	Non
1.71308e+09	10.72	Normal	Non
1.71308e+09	10.76	Normal	Non
1.71308e+09	10.81	Normal	Non
1.71308e+09	10.85	Normal	Non
1.71308e+09	10.88	Normal	Non
1.71308e+09	10.92	Normal	Non
1.71308e+09	10.95	Normal	Non
1.71308e+09	10.99	Normal	Non
1.71308e+09	11.02	Normal	Non
1.71308e+09	11.06	Normal	Non
1.71308e+09	11.1	Normal	Non
1.71308e+09	11.14	Normal	Non
1.71308e+09	11.18	Normal	Non
1.71308e+09	11.22	Turn over	Ring
1.71308e+09	11.27	Normal	Non
1.71308e+09	11.31	Turn over	Ring
1.71308e+09	11.36	Turn over	Ring
1.71308e+09	11.4	Normal	Non
1.71308e+09	11.45	Normal	Non
1.71308e+09	11.48	Normal	Non
1.71308e+09	11.53	Normal	Non
1.71308e+09	11.57	Normal	Non
1.71308e+09	11.62	Normal	Non
1.71308e+09	11.66	Normal	Non
1.71308e+09	11.7	Normal	Non
1.71308e+09	11.74	Normal	Non
1.71308e+09	11.78	Normal	Non
1.71308e+09	11.82	Normal	Non
1.71308e+09	11.86	Normal	Non
1.71308e+09	11.9	Normal	Non
1.71308e+09	11.95	Normal	Non
1.71308e+09	12	Normal	Non
1.71308e+09	12.04	Normal	Non
1.71308e+09	12.07	Normal	Non
1.71308e+09	12.12	Normal	Non
1.71308e+09	12.16	Normal	Non
1.71308e+09	12.21	Normal	Non
1.71308e+09	12.24	Normal	Non
1.71308e+09	12.29	Normal	Non
1.71308e+09	12.32	Normal	Non
1.71308e+09	12.37	Normal	Non
1.71308e+09	12.41	Normal	Non
1.71308e+09	12.44	Normal	Non
1.71308e+09	12.47	Normal	Non
1.71308e+09	12.52	Normal	Non
1.71308e+09	12.57	Normal	Non
1.71308e+09	12.61	Normal	Non
1.71308e+09	12.64	Normal	Non
1.71308e+09	12.67	Normal	Non
1.71308e+09	12.72	Normal	Non
1.71308e+09	12.75	Normal	Non
1.71308e+09	12.8	Normal	Non
1.71308e+09	12.83	Turn over	Ring
1.71308e+09	12.88	Normal	Non
1.71308e+09	12.91	Normal	Non
1.71308e+09	12.94	Turn over	Ring
1.71308e+09	12.97	Turn over	Ring
1.71308e+09	13	Turn over	Ring
1.71308e+09	13.05	Turn over	Ring
1.71308e+09	13.09	Turn over	Ring
1.71308e+09	13.13	Turn over	Ring
1.71308e+09	13.17	Turn over	Ring
1.71308e+09	13.2	Turn over	Ring
1.71308e+09	13.23	Turn over	Ring
1.71308e+09	13.26	Turn over	Ring
1.71308e+09	13.29	Turn over	Ring
1.71308e+09	13.32	Turn over	Ring
1.71308e+09	13.36	Turn over	Ring
1.71308e+09	13.39	Turn over	Ring
1.71308e+09	13.42	Turn over	Ring
1.71308e+09	13.45	Turn over	Ring
1.71308e+09	13.48	Turn over	Ring
1.71308e+09	13.51	Turn over	Ring
1.71308e+09	13.56	Turn over	Ring
1.71308e+09	13.59	Turn over	Ring
1.71308e+09	13.62	Turn over	Ring
1.71308e+09	13.66	Turn over	Ring
1.71308e+09	13.69	Turn over	Ring
1.71308e+09	13.72	Turn over	Ring
1.71308e+09	13.77	Turn over	Ring
1.71308e+09	13.8	Turn over	Ring
1.71308e+09	13.83	Turn over	Ring
1.71308e+09	13.86	Turn over	Ring
1.71308e+09	13.89	Turn over	Ring
1.71308e+09	13.92	Turn over	Ring
1.71308e+09	13.97	Turn over	Ring
1.71308e+09	14	Turn over	Ring
1.71308e+09	14.03	Turn over	Ring
1.71308e+09	14.06	Turn over	Ring
1.71308e+09	14.09	Turn over	Ring
1.71308e+09	14.12	Turn over	Ring
1.71308e+09	14.16	Turn over	Ring
1.71308e+09	14.19	Turn over	Ring
1.71308e+09	14.22	Turn over	Ring
1.71308e+09	14.25	Turn over	Ring
1.71308e+09	14.28	Turn over	Ring
1.71308e+09	14.33	Turn over	Ring
1.71308e+09	14.36	Turn over	Ring
1.71308e+09	14.4	Turn over	Ring
1.71308e+09	14.43	Turn over	Ring
1.71308e+09	14.46	Turn over	Ring
1.71308e+09	14.5	Turn over	Ring
1.71308e+09	14.53	Turn over	Ring
1.71308e+09	14.57	Turn over	Ring
1.71308e+09	14.61	Turn over	Ring
1.71308e+09	14.64	Turn over	Ring
1.71308e+09	14.67	Turn over	Ring
1.71308e+09	14.7	Turn over	Ring
1.71308e+09	14.73	Turn over	Ring
1.71308e+09	14.77	Turn over	Ring
1.71308e+09	14.8	Turn over	Ring
1.71308e+09	14.83	Turn over	Ring
1.71308e+09	14.86	Turn over	Ring
1.71308e+09	14.89	Turn over	Ring
1.71308e+09	14.92	Turn over	Ring
1.71308e+09	14.97	Turn over	Ring
1.71308e+09	15	Turn over	Ring
1.71308e+09	15.03	Turn over	Ring
1.71308e+09	15.06	Turn over	Ring
1.71308e+09	15.09	Turn over	Ring
1.71308e+09	15.13	Turn over	Ring
1.71308e+09	15.17	Turn over	Ring
1.71308e+09	15.2	Turn over	Ring
1.71308e+09	15.23	Turn over	Ring
1.71308e+09	15.26	Turn over	Ring
1.71308e+09	15.29	Turn over	Ring
1.71308e+09	15.34	Turn over	Ring
1.71308e+09	15.37	Turn over	Ring
1.71308e+09	15.4	Turn over	Ring
1.71308e+09	15.43	Turn over	Ring
1.71308e+09	15.46	Turn over	Ring
1.71308e+09	15.49	Turn over	Ring
1.71308e+09	15.53	Turn over	Ring
1.71308e+09	15.57	Turn over	Ring
1.71308e+09	15.6	Turn over	Ring
1.71308e+09	15.63	Turn over	Ring
1.71308e+09	15.66	Turn over	Ring
1.71308e+09	15.69	Turn over	Ring
1.71308e+09	15.73	Turn over	Ring
1.71308e+09	15.76	Turn over	Ring
1.71308e+09	15.79	Turn over	Ring
1.71308e+09	15.82	Turn over	Ring
1.71308e+09	15.85	Turn over	Ring
1.71308e+09	15.89	Turn over	Ring
1.71308e+09	15.93	Turn over	Ring
1.71308e+09	15.97	Turn over	Ring
1.71308e+09	16.01	Turn over	Ring
1.71308e+09	16.04	Turn over	Ring
1.71308e+09	16.07	Turn over	Ring
1.71308e+09	16.1	Turn over	Ring
1.71308e+09	16.13	Turn over	Ring
1.71308e+09	16.16	Turn over	Ring
1.71308e+09	16.19	Turn over	Ring
1.71308e+09	16.22	Turn over	Ring
1.71308e+09	16.25	Turn over	Ring
1.71308e+09	16.29	Turn over	Ring
1.71308e+09	16.33	Turn over	Ring
1.71308e+09	16.38	Turn over	Ring
1.71308e+09	16.41	Turn over	Ring
1.71308e+09	16.44	Turn over	Ring
1.71308e+09	16.47	Turn over	Ring
1.71308e+09	16.5	Turn over	Ring
1.71308e+09	16.53	Turn over	Ring
1.71308e+09	16.56	Turn over	Ring
1.71308e+09	16.59	Turn over	Ring
1.71308e+09	16.62	Turn over	Ring
1.71308e+09	16.66	Turn over	Ring
1.71308e+09	16.69	Turn over	Ring
1.71308e+09	16.73	Turn over	Ring
1.71308e+09	16.76	Turn over	Ring
1.71308e+09	16.8	Turn over	Ring
1.71308e+09	16.83	Turn over	Ring
1.71308e+09	16.86	Turn over	Ring
1.71308e+09	16.89	Turn over	Ring
1.71308e+09	16.94	Turn over	Ring
1.71308e+09	16.97	Turn over	Ring
1.71308e+09	17	Turn over	Ring
1.71308e+09	17.03	Turn over	Ring
1.71308e+09	17.06	Turn over	Ring
1.71308e+09	17.1	Turn over	Ring
1.71308e+09	17.14	Turn over	Ring
1.71308e+09	17.17	Turn over	Ring
1.71308e+09	17.2	Turn over	Ring
1.71308e+09	17.23	Turn over	Ring
1.71308e+09	17.26	Turn over	Ring
1.71308e+09	17.3	Turn over	Ring
1.71308e+09	17.33	Turn over	Ring
1.71308e+09	17.37	Turn over	Ring
1.71308e+09	17.4	Turn over	Ring
1.71308e+09	17.43	Turn over	Ring
1.71308e+09	17.46	Turn over	Ring
1.71308e+09	17.5	Turn over	Ring
1.71308e+09	17.54	Turn over	Ring
1.71308e+09	17.58	Turn over	Ring
1.71308e+09	17.61	Turn over	Ring
1.71308e+09	17.64	Turn over	Ring
1.71308e+09	17.67	Turn over	Ring
1.71308e+09	17.7	Turn over	Ring
1.71308e+09	17.73	Turn over	Ring
1.71308e+09	17.76	Turn over	Ring
1.71308e+09	17.79	Turn over	Ring
1.71308e+09	17.83	Turn over	Ring
1.71308e+09	17.86	Turn over	Ring
1.71308e+09	17.9	Turn over	Ring
1.71308e+09	17.94	Turn over	Ring
1.71308e+09	22.27	Normal	Non
1.71308e+09	22.31	Turn over	Ring
1.71308e+09	22.34	Turn over	Ring
1.71308e+09	22.37	Turn over	Ring
1.71308e+09	22.4	Turn over	Ring
1.71308e+09	22.43	Normal	Non
1.71308e+09	22.46	Normal	Non
1.71308e+09	22.49	Turn over	Ring
1.71308e+09	22.52	Turn over	Ring
1.71308e+09	22.56	Turn over	Ring
1.71308e+09	22.59	Turn over	Ring
1.71308e+09	22.63	Turn over	Ring
1.71308e+09	22.67	Turn over	Ring
1.71308e+09	22.7	Normal	Non
1.71308e+09	22.73	Turn over	Ring
1.71308e+09	22.76	Normal	Non
1.71308e+09	22.8	Turn over	Ring
1.71308e+09	22.84	Turn over	Ring
1.71308e+09	22.87	Turn over	Ring
1.71308e+09	22.9	Turn over	Ring
1.71308e+09	22.93	Turn over	Ring
1.71308e+09	22.96	Turn over	Ring
1.71308e+09	23	Turn over	Ring
1.71308e+09	23.03	Turn over	Ring
1.71308e+09	23.06	Turn over	Ring
1.71308e+09	23.11	Turn over	Ring
1.71308e+09	23.15	Turn over	Ring
1.71308e+09	23.18	Turn over	Ring
1.71308e+09	23.23	Turn over	Ring
1.71308e+09	23.26	Turn over	Ring
1.71308e+09	23.29	Turn over	Ring
1.71308e+09	23.32	Turn over	Ring
1.71308e+09	23.36	Turn over	Ring
1.71308e+09	23.39	Normal	Non
1.71308e+09	23.42	Normal	Non
1.71308e+09	23.45	Normal	Non
1.71308e+09	23.5	Normal	Non
1.71308e+09	23.53	Normal	Non
1.71308e+09	23.56	Normal	Non
1.71308e+09	23.59	Turn over	Ring
1.71308e+09	23.64	Turn over	Ring
1.71308e+09	23.67	Turn over	Ring
1.71308e+09	23.7	Turn over	Ring
1.71308e+09	23.73	Normal	Non
1.71308e+09	23.76	Normal	Non
1.71308e+09	23.79	Turn over	Ring
1.71308e+09	23.82	Turn over	Ring
1.71308e+09	23.85	Turn over	Ring
1.71308e+09	23.88	Turn over	Ring
1.71308e+09	23.91	Turn over	Ring
1.71308e+09	23.95	Turn over	Ring
1.71308e+09	23.98	Turn over	Ring
1.71308e+09	24.01	Turn over	Ring
1.71308e+09	24.04	Turn over	Ring
1.71308e+09	24.07	Turn over	Ring
1.71308e+09	24.12	Turn over	Ring
1.71308e+09	24.15	Turn over	Ring
1.71308e+09	24.18	Turn over	Ring
1.71308e+09	24.21	Turn over	Ring
1.71308e+09	24.24	Turn over	Ring
1.71308e+09	24.27	Turn over	Ring
1.71308e+09	24.3	Turn over	Ring
1.71308e+09	24.33	Turn over	Ring
1.71308e+09	24.37	Turn over	Ring
1.71308e+09	24.4	Normal	Non
1.71308e+09	24.43	Normal	Non
1.71308e+09	24.46	Normal	Non
1.71308e+09	24.49	Turn over	Ring
1.71308e+09	24.52	Normal	Non
1.71308e+09	24.56	Normal	Non
1.71308e+09	24.6	Normal	Non
1.71308e+09	24.63	Turn over	Ring
1.71308e+09	24.68	Turn over	Ring
1.71308e+09	24.71	Turn over	Ring
1.71308e+09	24.76	Turn over	Ring
1.71308e+09	24.8	Normal	Non
1.71308e+09	24.83	Normal	Non
1.71308e+09	24.86	Normal	Non
1.71308e+09	24.89	Normal	Non
1.71308e+09	24.93	Normal	Non
1.71308e+09	24.96	Turn over	Ring
1.71308e+09	24.99	Normal	Non
1.71308e+09	25.02	Normal	Non
1.71308e+09	25.05	Normal	Non
1.71308e+09	25.08	Normal	Non
1.71308e+09	25.11	Turn over	Ring
1.71308e+09	25.14	Normal	Non
1.71308e+09	25.17	Turn over	Ring
1.71308e+09	25.21	Turn over	Ring
1.71308e+09	25.24	Turn over	Ring
1.71308e+09	25.27	Turn over	Ring
1.71308e+09	25.3	Turn over	Ring
1.71308e+09	25.33	Turn over	Ring
1.71308e+09	25.36	Turn over	Ring
1.71308e+09	25.39	Turn over	Ring
1.71308e+09	25.42	Turn over	Ring
1.71308e+09	25.45	Turn over	Ring
1.71308e+09	25.48	Normal	Non
1.71308e+09	25.52	Turn over	Ring
1.71308e+09	25.56	Turn over	Ring
1.71308e+09	25.6	Turn over	Ring
1.71308e+09	25.63	Turn over	Ring
1.71308e+09	25.66	Turn over	Ring
1.71308e+09	25.69	Turn over	Ring
1.71308e+09	25.72	Normal	Non
1.71308e+09	25.77	Turn over	Ring
1.71308e+09	25.8	Turn over	Ring
1.71308e+09	25.83	Normal	Non
1.71308e+09	25.86	Turn over	Ring
1.71308e+09	25.89	Normal	Non
1.71308e+09	25.92	Normal	Non
1.71308e+09	25.96	Turn over	Ring
1.71308e+09	26	Normal	Non
1.71308e+09	26.03	Normal	Non
1.71308e+09	26.06	Normal	Non
1.71308e+09	26.09	Normal	Non
1.71308e+09	26.13	Normal	Non
1.71308e+09	26.16	Normal	Non
1.71308e+09	26.19	Normal	Non
1.71308e+09	26.22	Normal	Non
1.71308e+09	26.27	Normal	Non
1.71308e+09	26.31	Turn over	Ring
1.71308e+09	26.35	Turn over	Ring
1.71308e+09	26.39	Normal	Non
1.71308e+09	26.42	Normal	Non
1.71308e+09	26.46	Normal	Non
1.71308e+09	26.5	Normal	Non
1.71308e+09	26.53	Normal	Non
1.71308e+09	26.58	Normal	Non
1.71308e+09	26.63	Normal	Non
1.71308e+09	26.67	Normal	Non
1.71308e+09	26.72	Normal	Non
1.71308e+09	26.75	Normal	Non
1.71308e+09	26.8	Normal	Non
1.71308e+09	26.84	Normal	Non
1.71308e+09	26.88	Normal	Non
1.71308e+09	26.92	Normal	Non
1.71308e+09	26.95	Normal	Non
1.71308e+09	26.99	Normal	Non
1.71308e+09	27.04	Normal	Non
1.71308e+09	27.09	Normal	Non
1.71308e+09	27.12	Normal	Non
1.71308e+09	27.15	Normal	Non
1.71308e+09	27.2	Normal	Non
1.71308e+09	27.24	Normal	Non
1.71308e+09	27.27	Normal	Non
1.71308e+09	27.31	Normal	Non
1.71308e+09	27.35	Normal	Non
1.71308e+09	27.38	Normal	Non
1.71308e+09	27.43	Normal	Non
1.71308e+09	27.46	Normal	Non
1.71308e+09	27.51	Normal	Non
1.71308e+09	27.54	Normal	Non
1.71308e+09	27.58	Normal	Non
1.71308e+09	27.61	Normal	Non
1.71308e+09	27.65	Normal	Non
1.71308e+09	27.68	Normal	Non
1.71308e+09	27.72	Normal	Non
1.71308e+09	27.77	Normal	Non
1.71308e+09	27.8	Normal	Non
1.71308e+09	27.84	Normal	Non
1.71308e+09	27.87	Normal	Non
1.71308e+09	27.92	Normal	Non
1.71308e+09	27.96	Normal	Non
1.71308e+09	27.99	Normal	Non
1.71308e+09	28.04	Normal	Non
1.71308e+09	28.07	Normal	Non
1.71308e+09	28.1	Normal	Non
1.71308e+09	28.13	Normal	Non
1.71308e+09	28.18	Normal	Non
1.71308e+09	28.22	Normal	Non
1.71308e+09	28.25	Normal	Non
1.71308e+09	28.29	Normal	Non
1.71308e+09	28.34	Normal	Non
1.71308e+09	28.38	Normal	Non
1.71308e+09	28.41	Normal	Non
1.71308e+09	28.44	Normal	Non
1.71308e+09	28.47	Normal	Non
1.71308e+09	28.51	Normal	Non
1.71308e+09	28.55	Normal	Non
1.71308e+09	28.6	Normal	Non
1.71308e+09	28.64	Normal	Non
1.71308e+09	28.69	Normal	Non
1.71308e+09	28.74	Normal	Non
1.71308e+09	28.78	Normal	Non
1.71308e+09	28.82	Normal	Non
1.71308e+09	28.86	Normal	Non
1.71308e+09	28.89	Normal	Non
1.71308e+09	28.92	Normal	Non
1.71308e+09	28.96	Normal	Non
1.71308e+09	28.99	Normal	Non
1.71308e+09	29.02	Normal	Non
1.71308e+09	29.07	Normal	Non
1.71308e+09	29.11	Normal	Non
1.71308e+09	29.16	Normal	Non
1.71308e+09	29.19	Normal	Non
1.71308e+09	29.24	Normal	Non
1.71308e+09	29.27	Normal	Non
1.71308e+09	29.3	Normal	Non
1.71308e+09	29.33	Normal	Non
1.71308e+09	29.38	Normal	Non
1.71308e+09	29.42	Normal	Non
1.71308e+09	29.45	Normal	Non
1.71308e+09	29.49	Normal	Non
1.71308e+09	29.52	Normal	Non
1.71308e+09	29.57	Normal	Non
1.71308e+09	29.61	Normal	Non
1.71308e+09	29.65	Normal	Non
1.71308e+09	29.69	Normal	Non
1.71308e+09	29.72	Normal	Non
1.71308e+09	29.77	Normal	Non
1.71308e+09	29.8	Normal	Non
1.71308e+09	29.83	Normal	Non
1.71308e+09	29.88	Normal	Non
1.71308e+09	29.91	Normal	Non
1.71308e+09	29.94	Normal	Non
1.71308e+09	29.99	Normal	Non
1.71308e+09	30.03	Normal	Non
1.71308e+09	30.06	Normal	Non
1.71308e+09	30.1	Normal	Non
1.71308e+09	30.13	Normal	Non
1.71308e+09	30.16	Normal	Non
1.71308e+09	30.2	Normal	Non
1.71308e+09	30.24	Normal	Non
1.71308e+09	30.28	Normal	Non
1.71308e+09	30.33	Normal	Non
1.71308e+09	30.38	Normal	Non
1.71308e+09	30.41	Normal	Non
1.71308e+09	30.46	Normal	Non
1.71308e+09	30.5	Normal	Non
1.71308e+09	30.53	Normal	Non
1.71308e+09	30.58	Normal	Non
1.71308e+09	30.61	Normal	Non
1.71308e+09	30.66	Normal	Non
1.71308e+09	30.69	Normal	Non
1.71308e+09	30.73	Normal	Non
1.71308e+09	30.77	Normal	Non
1.71308e+09	30.81	Normal	Non
1.71308e+09	30.86	Normal	Non
1.71308e+09	30.91	Normal	Non
1.71308e+09	30.95	Normal	Non
1.71308e+09	30.99	Normal	Non
1.71308e+09	31.03	Normal	Non
1.71308e+09	31.08	Normal	Non
1.71308e+09	31.11	Normal	Non
1.71308e+09	31.15	Normal	Non
1.71308e+09	31.2	Normal	Non
1.71308e+09	31.25	Normal	Non
1.71308e+09	31.28	Normal	Non
1.71308e+09	31.31	Normal	Non
1.71308e+09	31.34	Normal	Non
1.71308e+09	31.39	Normal	Non
1.71308e+09	31.44	Normal	Non
1.71308e+09	31.5	Normal	Non
1.71308e+09	31.54	Normal	Non
1.71308e+09	31.57	Turn over	Ring
1.71308e+09	31.61	Turn over	Ring
1.71308e+09	31.66	Normal	Non
1.71308e+09	31.7	Normal	Non
1.71308e+09	31.75	Normal	Non
1.71308e+09	31.8	Normal	Non
1.71308e+09	31.84	Normal	Non
1.71308e+09	31.9	Normal	Non
1.71308e+09	31.94	Normal	Non
1.71308e+09	31.98	Turn over	Ring
1.71308e+09	32.01	Normal	Non
1.71308e+09	32.06	Normal	Non
1.71308e+09	32.1	Normal	Non
1.71308e+09	32.15	Normal	Non
1.71308e+09	32.18	Normal	Non
1.71308e+09	32.23	Normal	Non
1.71308e+09	32.3	Turn over	Ring
1.71308e+09	32.34	Turn over	Ring
1.71308e+09	32.37	Turn over	Ring
1.71308e+09	32.4	Turn over	Ring
1.71308e+09	32.43	Turn over	Ring
1.71308e+09	32.46	Turn over	Ring
1.71308e+09	32.5	Turn over	Ring
1.71308e+09	32.53	Normal	Non
1.71308e+09	32.56	Turn over	Ring
1.71308e+09	32.59	Turn over	Ring
1.71308e+09	32.64	Turn over	Ring
1.71308e+09	32.68	Turn over	Ring
1.71308e+09	32.73	Turn over	Ring
1.71308e+09	32.76	Turn over	Ring
1.71308e+09	32.8	Normal	Non
1.71308e+09	32.84	Turn over	Ring
1.71308e+09	32.87	Normal	Non
1.71308e+09	32.92	Normal	Non
1.71308e+09	32.96	Normal	Non
1.71308e+09	33.01	Normal	Non
1.71308e+09	33.04	Normal	Non
1.71308e+09	33.07	Normal	Non
1.71308e+09	33.12	Normal	Non
1.71308e+09	33.15	Normal	Non
1.71308e+09	33.2	Normal	Non
1.71308e+09	33.24	Normal	Non
1.71308e+09	33.27	Normal	Non
1.71308e+09	33.31	Normal	Non
1.71308e+09	33.35	Normal	Non
1.71308e+09	33.38	Normal	Non
1.71308e+09	33.43	Normal	Non
1.71308e+09	33.46	Normal	Non
1.71308e+09	33.51	Normal	Non
1.71308e+09	33.55	Normal	Non
1.71308e+09	33.59	Normal	Non
1.71308e+09	33.63	Normal	Non
1.71308e+09	33.68	Normal	Non
1.71308e+09	33.71	Normal	Non
1.71308e+09	33.76	Normal	Non
1.71308e+09	33.8	Normal	Non
1.71308e+09	33.83	Normal	Non
1.71308e+09	33.88	Normal	Non
1.71308e+09	33.92	Normal	Non
1.71308e+09	33.95	Turn over	Ring
1.71308e+09	33.98	Turn over	Ring
1.71308e+09	34.02	Turn over	Ring
1.71308e+09	34.05	Turn over	Ring
1.71308e+09	34.08	Turn over	Ring
1.71308e+09	34.12	Normal	Non
1.71308e+09	34.16	Turn over	Ring
1.71308e+09	34.19	Normal	Non
1.71308e+09	34.23	Normal	Non
1.71308e+09	34.28	Normal	Non
1.71308e+09	34.31	Turn over	Ring
1.71308e+09	34.35	Normal	Non
1.71308e+09	34.39	Normal	Non
1.71308e+09	34.44	Turn over	Ring
1.71308e+09	34.48	Turn over	Ring
1.71308e+09	34.51	Turn over	Ring
1.71308e+09	34.56	Normal	Non
1.71308e+09	34.59	Normal	Non
1.71308e+09	34.64	Normal	Non
1.71308e+09	34.69	Normal	Non
1.71308e+09	34.73	Normal	Non
1.71308e+09	34.78	Turn over	Ring
1.71308e+09	34.83	Normal	Non
1.71308e+09	34.86	Normal	Non
1.71308e+09	34.9	Turn over	Ring
1.71308e+09	34.94	Turn over	Ring
1.71308e+09	34.98	Normal	Non
1.71308e+09	35.01	Normal	Non
1.71308e+09	35.05	Turn over	Ring
1.71308e+09	35.08	Normal	Non
1.71308e+09	35.12	Normal	Non
1.71308e+09	35.17	Normal	Non
1.71308e+09	35.2	Normal	Non
1.71308e+09	35.23	Normal	Non
1.71308e+09	35.27	Normal	Non
1.71308e+09	35.31	Normal	Non
1.71308e+09	35.34	Normal	Non
1.71308e+09	35.38	Normal	Non
1.71308e+09	35.42	Normal	Non
1.71308e+09	35.47	Normal	Non
1.71308e+09	35.51	Normal	Non
1.71308e+09	35.55	Normal	Non
1.71308e+09	35.59	Normal	Non
1.71308e+09	35.64	Normal	Non
1.71308e+09	35.69	Turn over	Ring
1.71308e+09	35.72	Turn over	Ring
1.71308e+09	35.77	Turn over	Ring
1.71308e+09	35.81	Turn over	Ring
1.71308e+09	35.84	Turn over	Ring
1.71308e+09	35.89	Turn over	Ring
1.71308e+09	35.94	Turn over	Ring
1.71308e+09	35.98	Turn over	Ring
1.71308e+09	36.01	Turn over	Ring
1.71308e+09	36.04	Turn over	Ring
1.71308e+09	36.08	Turn over	Ring
1.71308e+09	36.12	Turn over	Ring
1.71308e+09	36.15	Turn over	Ring
1.71308e+09	36.18	Turn over	Ring
1.71308e+09	36.21	Turn over	Ring
1.71308e+09	36.25	Turn over	Ring
1.71308e+09	36.28	Turn over	Ring
1.71308e+09	36.31	Turn over	Ring
1.71308e+09	36.34	Turn over	Ring
1.71308e+09	36.37	Turn over	Ring
1.71308e+09	36.4	Turn over	Ring
1.71308e+09	36.43	Turn over	Ring
1.71308e+09	36.46	Turn over	Ring
1.71308e+09	36.49	Normal	Non
1.71308e+09	36.53	Normal	Non
1.71308e+09	36.56	Normal	Non
1.71308e+09	36.59	Normal	Non
1.71308e+09	36.62	Normal	Non
1.71308e+09	36.65	Turn over	Ring
1.71308e+09	36.68	Turn over	Ring
1.71308e+09	36.71	Turn over	Ring
1.71308e+09	36.74	Turn over	Ring
1.71308e+09	36.78	Turn over	Ring
1.71308e+09	36.81	Turn over	Ring
1.71308e+09	36.84	Turn over	Ring
1.71308e+09	36.87	Turn over	Ring
1.71308e+09	36.9	Turn over	Ring
1.71308e+09	36.93	Turn over	Ring
1.71308e+09	36.96	Turn over	Ring
1.71308e+09	36.99	Turn over	Ring
1.71308e+09	37.03	Turn over	Ring
1.71308e+09	37.06	Turn over	Ring
1.71308e+09	37.09	Turn over	Ring
1.71308e+09	37.12	Turn over	Ring
1.71308e+09	37.16	Turn over	Ring
1.71308e+09	37.19	Turn over	Ring
1.71308e+09	37.23	Turn over	Ring
1.71308e+09	37.26	Turn over	Ring
1.71308e+09	37.29	Turn over	Ring
1.71308e+09	37.32	Turn over	Ring
1.71308e+09	37.36	Turn over	Ring
1.71308e+09	37.4	Turn over	Ring
1.71308e+09	37.43	Turn over	Ring
1.71308e+09	37.46	Turn over	Ring
1.71308e+09	37.49	Turn over	Ring
1.71308e+09	37.52	Turn over	Ring
1.71308e+09	37.56	Turn over	Ring
1.71308e+09	37.6	Turn over	Ring
1.71308e+09	37.63	Turn over	Ring
1.71308e+09	37.67	Turn over	Ring
1.71308e+09	37.7	Turn over	Ring
1.71308e+09	37.73	Turn over	Ring
1.71308e+09	37.76	Turn over	Ring
1.71308e+09	37.79	Turn over	Ring
1.71308e+09	37.82	Turn over	Ring
1.71308e+09	37.85	Turn over	Ring
1.71308e+09	37.88	Turn over	Ring
1.71308e+09	37.93	Turn over	Ring
1.71308e+09	37.96	Turn over	Ring
1.71308e+09	38	Turn over	Ring
1.71308e+09	38.03	Turn over	Ring
1.71308e+09	38.06	Turn over	Ring
1.71308e+09	38.09	Turn over	Ring
1.71308e+09	38.12	Turn over	Ring
1.71308e+09	38.15	Turn over	Ring
1.71308e+09	38.18	Turn over	Ring
1.71308e+09	38.22	Turn over	Ring
1.71308e+09	38.25	Turn over	Ring
1.71308e+09	38.28	Turn over	Ring
1.71308e+09	38.33	Turn over	Ring
1.71308e+09	38.37	Turn over	Ring
1.71308e+09	38.4	Turn over	Ring
1.71308e+09	38.43	Turn over	Ring
1.71308e+09	38.46	Turn over	Ring
1.71308e+09	38.5	Turn over	Ring
1.71308e+09	38.53	Turn over	Ring
1.71308e+09	38.56	Turn over	Ring
1.71308e+09	38.59	Turn over	Ring
1.71308e+09	38.62	Turn over	Ring
1.71308e+09	38.65	Turn over	Ring
1.71308e+09	38.68	Turn over	Ring
1.71308e+09	38.73	Turn over	Ring
1.71308e+09	38.76	Turn over	Ring
1.71308e+09	38.81	Turn over	Ring
1.71308e+09	38.84	Turn over	Ring
1.71308e+09	38.87	Turn over	Ring
1.71308e+09	38.9	Turn over	Ring
1.71308e+09	38.93	Turn over	Ring
1.71308e+09	38.96	Turn over	Ring
1.71308e+09	38.99	Turn over	Ring
1.71308e+09	39.02	Turn over	Ring
1.71308e+09	39.05	Turn over	Ring
1.71308e+09	39.08	Turn over	Ring
1.71308e+09	39.13	Turn over	Ring
1.71308e+09	39.16	Turn over	Ring
1.71308e+09	39.2	Turn over	Ring
1.71308e+09	39.23	Turn over	Ring
1.71308e+09	39.26	Turn over	Ring
1.71308e+09	39.29	Turn over	Ring
1.71308e+09	39.32	Turn over	Ring
1.71308e+09	39.35	Turn over	Ring
1.71308e+09	39.38	Turn over	Ring
1.71308e+09	39.41	Turn over	Ring
1.71308e+09	39.45	Turn over	Ring
1.71308e+09	39.49	Turn over	Ring
1.71308e+09	39.53	Turn over	Ring
1.71308e+09	39.57	Turn over	Ring
1.71308e+09	39.6	Turn over	Ring
1.71308e+09	39.63	Turn over	Ring
1.71308e+09	39.66	Turn over	Ring
1.71308e+09	39.7	Turn over	Ring
1.71308e+09	39.73	Turn over	Ring
1.71308e+09	39.76	Turn over	Ring
1.71308e+09	39.79	Turn over	Ring
1.71308e+09	39.82	Turn over	Ring
1.71308e+09	39.85	Turn over	Ring
1.71308e+09	39.88	Turn over	Ring
1.71308e+09	39.93	Turn over	Ring
1.71308e+09	39.98	Turn over	Ring
1.71308e+09	40.01	Turn over	Ring
1.71308e+09	40.04	Turn over	Ring
1.71308e+09	40.07	Turn over	Ring
1.71308e+09	40.1	Turn over	Ring
1.71308e+09	40.13	Turn over	Ring
1.71308e+09	40.16	Turn over	Ring
1.71308e+09	40.19	Turn over	Ring
1.71308e+09	40.22	Turn over	Ring
1.71308e+09	40.25	Turn over	Ring
1.71308e+09	40.3	Turn over	Ring
1.71308e+09	40.33	Turn over	Ring
1.71308e+09	40.36	Turn over	Ring
1.71308e+09	40.39	Turn over	Ring
1.71308e+09	40.43	Turn over	Ring
1.71308e+09	40.46	Turn over	Ring
1.71308e+09	40.49	Turn over	Ring
1.71308e+09	40.53	Turn over	Ring
1.71308e+09	40.57	Turn over	Ring
1.71308e+09	40.6	Turn over	Ring
1.71308e+09	40.63	Turn over	Ring
1.71308e+09	40.66	Turn over	Ring
1.71308e+09	40.7	Turn over	Ring
1.71308e+09	40.74	Turn over	Ring
1.71308e+09	40.77	Turn over	Ring
1.71308e+09	40.8	Turn over	Ring
1.71308e+09	40.83	Turn over	Ring
1.71308e+09	40.86	Turn over	Ring
1.71308e+09	40.89	Turn over	Ring
1.71308e+09	40.92	Turn over	Ring
1.71308e+09	40.96	Turn over	Ring
1.71308e+09	40.99	Turn over	Ring
1.71308e+09	41.02	Turn over	Ring
1.71308e+09	41.05	Turn over	Ring
1.71308e+09	41.1	Turn over	Ring
1.71308e+09	41.13	Turn over	Ring
1.71308e+09	41.16	Turn over	Ring
1.71308e+09	41.19	Turn over	Ring
1.71308e+09	41.22	Turn over	Ring
1.71308e+09	41.26	Turn over	Ring
1.71308e+09	41.3	Turn over	Ring
1.71308e+09	41.33	Turn over	Ring
1.71308e+09	41.36	Turn over	Ring
1.71308e+09	41.39	Turn over	Ring
1.71308e+09	41.42	Turn over	Ring
1.71308e+09	41.45	Turn over	Ring
1.71308e+09	41.5	Turn over	Ring
1.71308e+09	41.53	Turn over	Ring
1.71308e+09	41.56	Turn over	Ring
1.71308e+09	41.59	Turn over	Ring
1.71308e+09	41.62	Turn over	Ring
1.71308e+09	45.94	Normal	Non
1.71308e+09	45.97	Normal	Non
1.71308e+09	46	Normal	Non
1.71308e+09	46.05	Normal	Non
1.71308e+09	46.08	Normal	Non
1.71308e+09	46.11	Normal	Non
1.71308e+09	46.16	Normal	Non
1.71308e+09	46.19	Normal	Non
1.71308e+09	46.24	Normal	Non
1.71308e+09	46.27	Normal	Non
1.71308e+09	46.3	Normal	Non
1.71308e+09	46.33	Normal	Non
1.71308e+09	46.36	Normal	Non
1.71308e+09	46.4	Normal	Non
1.71308e+09	46.44	Normal	Non
1.71308e+09	46.47	Normal	Non
1.71308e+09	46.5	Normal	Non
1.71308e+09	46.53	Normal	Non
1.71308e+09	46.56	Normal	Non
1.71308e+09	46.59	Normal	Non
1.71308e+09	46.63	Normal	Non
1.71308e+09	46.67	Normal	Non
1.71308e+09	46.7	Normal	Non
1.71308e+09	46.73	Normal	Non
1.71308e+09	46.77	Normal	Non
1.71308e+09	46.8	Normal	Non
1.71308e+09	46.84	Normal	Non
1.71308e+09	46.89	Normal	Non
1.71308e+09	46.92	Normal	Non
1.71308e+09	46.97	Normal	Non
1.71308e+09	47.01	Normal	Non
1.71308e+09	47.04	Normal	Non
1.71308e+09	47.08	Normal	Non
1.71308e+09	47.11	Normal	Non
1.71308e+09	47.14	Normal	Non
1.71308e+09	47.19	Normal	Non
1.71308e+09	47.22	Normal	Non
1.71308e+09	47.25	Normal	Non
1.71308e+09	47.28	Normal	Non
1.71308e+09	47.31	Normal	Non
1.71308e+09	47.36	Normal	Non
1.71308e+09	47.4	Normal	Non
1.71308e+09	47.44	Normal	Non
1.71308e+09	47.48	Normal	Non
1.71308e+09	47.53	Normal	Non
1.71308e+09	47.57	Turn over	Ring
1.71308e+09	47.61	Normal	Non
1.71308e+09	47.65	Normal	Non
1.71308e+09	47.68	Normal	Non
1.71308e+09	47.72	Normal	Non
1.71308e+09	47.76	Normal	Non
1.71308e+09	47.79	Normal	Non
1.71308e+09	47.82	Normal	Non
1.71308e+09	47.85	Normal	Non
1.71308e+09	47.9	Normal	Non
1.71308e+09	47.93	Normal	Non
1.71308e+09	47.96	Normal	Non
1.71308e+09	47.99	Normal	Non
1.71308e+09	48.04	Normal	Non
1.71308e+09	48.07	Normal	Non
1.71308e+09	48.1	Normal	Non
1.71308e+09	48.13	Normal	Non
1.71308e+09	48.17	Normal	Non
1.71308e+09	48.2	Normal	Non
1.71308e+09	48.23	Normal	Non
1.71308e+09	48.26	Normal	Non
1.71308e+09	48.29	Normal	Non
1.71308e+09	48.33	Normal	Non
1.71308e+09	48.37	Normal	Non
1.71308e+09	48.4	Normal	Non
1.71308e+09	48.44	Normal	Non
1.71308e+09	48.48	Normal	Non
1.71308e+09	48.53	Normal	Non
1.71308e+09	48.56	Normal	Non
1.71308e+09	48.61	Normal	Non
1.71308e+09	48.65	Normal	Non
1.71308e+09	48.7	Normal	Non
1.71308e+09	48.73	Normal	Non
1.71308e+09	48.78	Normal	Non
1.71308e+09	48.81	Normal	Non
1.71308e+09	48.86	Normal	Non
1.71308e+09	48.9	Normal	Non
1.71308e+09	48.93	Turn over	Ring
1.71308e+09	48.97	Normal	Non
1.71308e+09	49	Normal	Non
1.71308e+09	49.04	Normal	Non
1.71308e+09	49.08	Normal	Non
1.71308e+09	49.12	Normal	Non
1.71308e+09	49.15	Normal	Non
1.71308e+09	49.19	Normal	Non
1.71308e+09	49.23	Normal	Non
1.71308e+09	49.28	Normal	Non
1.71308e+09	49.32	Normal	Non
1.71308e+09	49.37	Normal	Non
1.71308e+09	49.4	Normal	Non
1.71308e+09	49.45	Normal	Non
1.71308e+09	49.5	Normal	Non
1.71308e+09	49.54	Normal	Non
1.71308e+09	49.57	Normal	Non
1.71308e+09	49.62	Normal	Non
1.71308e+09	49.66	Normal	Non
1.71308e+09	49.7	Normal	Non
1.71308e+09	49.73	Normal	Non
1.71308e+09	49.77	Normal	Non
1.71308e+09	49.81	Normal	Non
1.71308e+09	49.85	Normal	Non
1.71308e+09	49.9	Normal	Non
1.71308e+09	49.95	Normal	Non
1.71308e+09	49.98	Normal	Non
1.71308e+09	50.02	Normal	Non
1.71308e+09	50.06	Normal	Non
1.71308e+09	50.09	Normal	Non
1.71308e+09	50.13	Normal	Non
1.71308e+09	50.18	Normal	Non
1.71308e+09	50.21	Normal	Non
1.71308e+09	50.24	Normal	Non
1.71308e+09	50.27	Normal	Non
1.71308e+09	50.3	Normal	Non
1.71308e+09	50.34	Normal	Non
1.71308e+09	50.37	Normal	Non
1.71308e+09	50.4	Turn over	Ring
1.71308e+09	50.43	Turn over	Ring
1.71308e+09	50.46	Turn over	Ring
1.71308e+09	50.49	Turn over	Ring
1.71308e+09	50.52	Turn over	Ring
1.71308e+09	50.55	Turn over	Ring
1.71308e+09	50.58	Turn over	Ring
1.71308e+09	50.61	Turn over	Ring
1.71308e+09	50.65	Turn over	Ring
1.71308e+09	50.68	Turn over	Ring
1.71308e+09	50.71	Turn over	Ring
1.71308e+09	50.74	Turn over	Ring
1.71308e+09	50.77	Turn over	Ring
1.71308e+09	50.8	Turn over	Ring
1.71308e+09	50.83	Turn over	Ring
1.71308e+09	50.86	Turn over	Ring
1.71308e+09	50.89	Turn over	Ring
1.71308e+09	50.93	Turn over	Ring
1.71308e+09	50.96	Turn over	Ring
1.71308e+09	50.99	Turn over	Ring
1.71308e+09	51.02	Normal	Non
1.71308e+09	51.05	Turn over	Ring
1.71308e+09	51.1	Turn over	Ring
1.71308e+09	51.13	Turn over	Ring
1.71308e+09	51.17	Turn over	Ring
1.71308e+09	51.2	Turn over	Ring
1.71308e+09	51.23	Turn over	Ring
1.71308e+09	51.27	Turn over	Ring
1.71308e+09	51.3	Turn over	Ring
1.71308e+09	51.33	Turn over	Ring
1.71308e+09	51.36	Turn over	Ring
1.71308e+09	51.39	Turn over	Ring
1.71308e+09	51.42	Turn over	Ring
1.71308e+09	51.45	Turn over	Ring
1.71308e+09	51.48	Turn over	Ring
1.71308e+09	51.53	Turn over	Ring
1.71308e+09	51.56	Turn over	Ring
1.71308e+09	51.6	Turn over	Ring
1.71308e+09	51.63	Turn over	Ring
1.71308e+09	51.67	Turn over	Ring
1.71308e+09	51.7	Turn over	Ring
1.71308e+09	51.73	Turn over	Ring
1.71308e+09	51.77	Turn over	Ring
1.71308e+09	51.8	Turn over	Ring
1.71308e+09	51.83	Turn over	Ring
1.71308e+09	51.86	Turn over	Ring
1.71308e+09	51.9	Turn over	Ring
1.71308e+09	51.93	Turn over	Ring
1.71308e+09	51.97	Turn over	Ring
1.71308e+09	52	Turn over	Ring
1.71308e+09	52.03	Turn over	Ring
1.71308e+09	52.06	Turn over	Ring
1.71308e+09	52.11	Turn over	Ring
1.71308e+09	52.14	Turn over	Ring
1.71308e+09	52.17	Turn over	Ring
1.71308e+09	52.2	Turn over	Ring
1.71308e+09	52.23	Turn over	Ring
1.71308e+09	52.28	Turn over	Ring
1.71308e+09	52.31	Turn over	Ring
1.71308e+09	52.34	Turn over	Ring
1.71308e+09	52.39	Turn over	Ring
1.71308e+09	52.42	Turn over	Ring
1.71308e+09	52.45	Turn over	Ring
1.71308e+09	52.48	Turn over	Ring
1.71308e+09	52.53	Turn over	Ring
1.71308e+09	52.56	Turn over	Ring
1.71308e+09	52.59	Turn over	Ring
1.71308e+09	52.63	Turn over	Ring
1.71308e+09	52.67	Turn over	Ring
1.71308e+09	52.7	Turn over	Ring
1.71308e+09	52.73	Turn over	Ring
1.71308e+09	52.76	Turn over	Ring
1.71308e+09	52.79	Turn over	Ring
1.71308e+09	52.82	Turn over	Ring
1.71308e+09	52.87	Turn over	Ring
1.71308e+09	52.91	Turn over	Ring
1.71308e+09	52.94	Turn over	Ring
1.71308e+09	52.97	Turn over	Ring
1.71308e+09	53.01	Turn over	Ring
1.71308e+09	53.04	Turn over	Ring
1.71308e+09	53.07	Turn over	Ring
1.71308e+09	53.11	Turn over	Ring
1.71308e+09	53.14	Turn over	Ring
1.71308e+09	53.18	Turn over	Ring
1.71308e+09	53.21	Turn over	Ring
1.71308e+09	53.24	Turn over	Ring
1.71308e+09	53.27	Turn over	Ring
1.71308e+09	53.3	Turn over	Ring
1.71308e+09	53.33	Turn over	Ring
1.71308e+09	53.36	Turn over	Ring
1.71308e+09	53.39	Turn over	Ring
1.71308e+09	53.43	Turn over	Ring
1.71308e+09	53.47	Turn over	Ring
1.71308e+09	53.5	Turn over	Ring
1.71308e+09	53.53	Turn over	Ring
1.71308e+09	53.56	Turn over	Ring
1.71308e+09	53.6	Turn over	Ring
1.71308e+09	53.63	Turn over	Ring
1.71308e+09	53.66	Turn over	Ring
1.71308e+09	53.69	Turn over	Ring
1.71308e+09	53.72	Turn over	Ring
1.71308e+09	53.75	Turn over	Ring
1.71308e+09	53.79	Turn over	Ring
1.71308e+09	53.82	Turn over	Ring
1.71308e+09	53.86	Turn over	Ring
1.71308e+09	53.89	Turn over	Ring
1.71308e+09	53.92	Turn over	Ring
1.71308e+09	53.96	Turn over	Ring
1.71308e+09	53.99	Turn over	Ring
1.71308e+09	54.02	Turn over	Ring
1.71308e+09	54.05	Turn over	Ring
1.71308e+09	54.08	Turn over	Ring
1.71308e+09	54.11	Turn over	Ring
1.71308e+09	54.14	Turn over	Ring
1.71308e+09	54.17	Turn over	Ring
1.71308e+09	54.2	Turn over	Ring
1.71308e+09	54.25	Turn over	Ring
1.71308e+09	54.28	Turn over	Ring
1.71308e+09	54.31	Turn over	Ring
1.71308e+09	54.34	Turn over	Ring
1.71308e+09	54.37	Turn over	Ring
1.71308e+09	54.4	Turn over	Ring
1.71308e+09	54.44	Turn over	Ring
1.71308e+09	54.47	Turn over	Ring
1.71308e+09	54.5	Turn over	Ring
1.71308e+09	54.53	Turn over	Ring
1.71308e+09	54.56	Turn over	Ring
1.71308e+09	54.59	Turn over	Ring
1.71308e+09	54.64	Turn over	Ring
1.71308e+09	54.68	Turn over	Ring
1.71308e+09	54.73	Turn over	Ring
1.71308e+09	54.76	Turn over	Ring
1.71308e+09	54.79	Turn over	Ring
1.71308e+09	54.82	Turn over	Ring
1.71308e+09	54.85	Turn over	Ring
1.71308e+09	54.89	Turn over	Ring
1.71308e+09	54.92	Turn over	Ring
1.71308e+09	54.96	Turn over	Ring
1.71308e+09	54.99	Turn over	Ring
1.71308e+09	55.03	Turn over	Ring
1.71308e+09	55.07	Turn over	Ring
1.71308e+09	55.1	Turn over	Ring
1.71308e+09	55.13	Turn over	Ring
1.71308e+09	55.16	Turn over	Ring
1.71308e+09	55.2	Turn over	Ring
1.71308e+09	55.23	Turn over	Ring
1.71308e+09	55.26	Turn over	Ring
1.71308e+09	55.29	Turn over	Ring
1.71308e+09	55.32	Turn over	Ring
1.71308e+09	55.35	Turn over	Ring
1.71308e+09	55.38	Turn over	Ring
1.71308e+09	55.41	Turn over	Ring
1.71308e+09	55.44	Turn over	Ring
1.71308e+09	55.47	Turn over	Ring
1.71308e+09	55.5	Turn over	Ring
1.71308e+09	55.55	Turn over	Ring
1.71308e+09	55.58	Turn over	Ring
1.71308e+09	55.61	Turn over	Ring
1.71308e+09	55.64	Turn over	Ring
1.71308e+09	55.67	Turn over	Ring
1.71308e+09	55.7	Turn over	Ring
1.71308e+09	55.74	Turn over	Ring
1.71308e+09	55.77	Turn over	Ring
1.71308e+09	55.8	Turn over	Ring
1.71308e+09	55.83	Turn over	Ring
1.71308e+09	55.86	Turn over	Ring
1.71308e+09	55.9	Turn over	Ring
1.71308e+09	55.94	Turn over	Ring
1.71308e+09	55.97	Turn over	Ring
1.71308e+09	56	Turn over	Ring
1.71308e+09	56.03	Turn over	Ring
1.71308e+09	60.34	Turn over	Ring
1.71308e+09	60.37	Turn over	Ring
1.71308e+09	60.4	Turn over	Ring
1.71308e+09	60.44	Turn over	Ring
1.71308e+09	60.48	Normal	Non
1.71308e+09	60.52	Turn over	Ring
1.71308e+09	60.56	Turn over	Ring
1.71308e+09	60.6	Turn over	Ring
1.71308e+09	60.64	Turn over	Ring
1.71308e+09	60.67	Turn over	Ring
1.71308e+09	60.7	Turn over	Ring
1.71308e+09	60.73	Turn over	Ring
1.71308e+09	60.77	Normal	Non
1.71308e+09	60.81	Normal	Non
1.71308e+09	60.86	Normal	Non
1.71308e+09	60.89	Turn over	Ring
1.71308e+09	60.94	Turn over	Ring
1.71308e+09	60.97	Turn over	Ring
1.71308e+09	61	Turn over	Ring
1.71308e+09	61.03	Turn over	Ring
1.71308e+09	61.06	Turn over	Ring
1.71308e+09	61.09	Turn over	Ring
1.71308e+09	61.12	Turn over	Ring
1.71308e+09	61.17	Turn over	Ring
1.71308e+09	61.2	Turn over	Ring
1.71308e+09	61.23	Turn over	Ring
1.71308e+09	61.26	Normal	Non
1.71308e+09	61.3	Normal	Non
1.71308e+09	61.33	Normal	Non
1.71308e+09	61.37	Turn over	Ring
1.71308e+09	61.4	Turn over	Ring
1.71308e+09	61.44	Normal	Non
1.71308e+09	61.48	Turn over	Ring
1.71308e+09	61.51	Turn over	Ring
1.71308e+09	61.55	Normal	Non
1.71308e+09	61.58	Normal	Non
1.71308e+09	61.61	Normal	Non
1.71308e+09	61.64	Normal	Non
1.71308e+09	61.69	Normal	Non
1.71308e+09	61.72	Normal	Non
1.71308e+09	61.77	Turn over	Ring
1.71308e+09	61.81	Normal	Non
1.71308e+09	61.85	Turn over	Ring
1.71308e+09	61.89	Turn over	Ring
1.71308e+09	61.93	Turn over	Ring
1.71308e+09	61.98	Normal	Non
1.71308e+09	62.03	Normal	Non
1.71308e+09	62.06	Turn over	Ring
1.71308e+09	62.09	Turn over	Ring
1.71308e+09	62.14	Turn over	Ring
1.71308e+09	62.18	Normal	Non
1.71308e+09	62.23	Normal	Non
1.71308e+09	62.26	Turn over	Ring
1.71308e+09	62.29	Turn over	Ring
1.71308e+09	62.32	Turn over	Ring
1.71308e+09	62.37	Turn over	Ring
1.71308e+09	62.41	Normal	Non
1.71308e+09	62.45	Normal	Non
1.71308e+09	62.49	Normal	Non
1.71308e+09	62.53	Turn over	Ring
1.71308e+09	62.56	Turn over	Ring
1.71308e+09	62.59	Turn over	Ring
1.71308e+09	62.64	Normal	Non
1.71308e+09	62.67	Normal	Non
1.71308e+09	62.7	Normal	Non
1.71308e+09	62.73	Turn over	Ring
1.71308e+09	62.77	Normal	Non
1.71308e+09	62.81	Normal	Non
1.71308e+09	62.86	Turn over	Ring
1.71308e+09	62.9	Normal	Non
1.71308e+09	62.94	Normal	Non
1.71308e+09	62.97	Normal	Non
1.71308e+09	63	Normal	Non
1.71308e+09	63.03	Turn over	Ring
1.71308e+09	63.08	Normal	Non
1.71308e+09	63.11	Normal	Non
1.71308e+09	63.16	Normal	Non
1.71308e+09	63.2	Normal	Non
1.71308e+09	63.25	Normal	Non
1.71308e+09	63.28	Normal	Non
1.71308e+09	63.33	Normal	Non
1.71308e+09	63.36	Normal	Non
1.71308e+09	63.39	Normal	Non
1.71308e+09	63.44	Normal	Non
1.71308e+09	63.48	Normal	Non
1.71308e+09	63.51	Normal	Non
1.71308e+09	63.54	Normal	Non
1.71308e+09	63.57	Normal	Non
1.71308e+09	63.61	Normal	Non
1.71308e+09	63.65	Normal	Non
1.71308e+09	63.7	Normal	Non
1.71308e+09	63.74	Normal	Non
1.71308e+09	63.78	Normal	Non
1.71308e+09	63.82	Normal	Non
1.71308e+09	63.85	Normal	Non
1.71308e+09	63.89	Normal	Non
1.71308e+09	63.93	Normal	Non
1.71308e+09	63.97	Normal	Non
1.71308e+09	64.01	Normal	Non
1.71308e+09	64.06	Normal	Non
1.71308e+09	64.09	Normal	Non
1.71308e+09	64.14	Normal	Non
1.71308e+09	64.17	Normal	Non
1.71308e+09	64.21	Normal	Non
1.71308e+09	64.25	Normal	Non
1.71308e+09	64.3	Normal	Non
1.71308e+09	64.34	Normal	Non
1.71308e+09	64.37	Normal	Non
1.71308e+09	64.42	Normal	Non
1.71308e+09	64.45	Normal	Non
1.71308e+09	64.48	Normal	Non
1.71308e+09	64.51	Normal	Non
1.71308e+09	64.56	Normal	Non
1.71308e+09	64.59	Normal	Non
1.71308e+09	64.64	Normal	Non
1.71308e+09	64.68	Normal	Non
1.71308e+09	64.73	Normal	Non
1.71308e+09	64.76	Normal	Non
1.71308e+09	64.79	Normal	Non
1.71308e+09	64.84	Normal	Non
1.71308e+09	64.89	Normal	Non
1.71308e+09	64.93	Normal	Non
1.71308e+09	64.96	Normal	Non
1.71308e+09	65	Normal	Non
1.71308e+09	65.04	Normal	Non
1.71308e+09	65.08	Normal	Non
1.71308e+09	65.12	Normal	Non
1.71308e+09	65.17	Normal	Non
1.71308e+09	65.2	Normal	Non
1.71308e+09	65.25	Normal	Non
1.71308e+09	65.28	Normal	Non
1.71308e+09	65.32	Normal	Non
1.71308e+09	65.37	Normal	Non
1.71308e+09	65.4	Normal	Non
1.71308e+09	65.45	Normal	Non
1.71308e+09	65.49	Normal	Non
1.71308e+09	65.54	Normal	Non
1.71308e+09	65.59	Normal	Non
1.71308e+09	65.63	Normal	Non
1.71308e+09	65.67	Normal	Non
1.71308e+09	65.71	Normal	Non
1.71308e+09	65.74	Normal	Non
1.71308e+09	65.79	Normal	Non
1.71308e+09	65.82	Normal	Non
1.71308e+09	65.87	Normal	Non
1.71308e+09	65.92	Normal	Non
1.71308e+09	65.96	Normal	Non
1.71308e+09	65.99	Normal	Non
1.71308e+09	66.04	Normal	Non
1.71308e+09	66.07	Normal	Non
1.71308e+09	66.12	Normal	Non
1.71308e+09	66.17	Normal	Non
1.71308e+09	66.2	Normal	Non
1.71308e+09	66.24	Normal	Non
1.71308e+09	66.3	Normal	Non
1.71308e+09	66.34	Normal	Non
1.71308e+09	66.38	Normal	Non
1.71308e+09	66.43	Normal	Non
1.71308e+09	66.46	Normal	Non
1.71308e+09	66.49	Normal	Non
1.71308e+09	66.54	Normal	Non
1.71308e+09	66.57	Normal	Non
1.71308e+09	66.62	Normal	Non
1.71308e+09	66.66	Normal	Non
1.71308e+09	66.69	Normal	Non
1.71308e+09	66.73	Normal	Non
1.71308e+09	66.77	Normal	Non
1.71308e+09	66.82	Normal	Non
1.71308e+09	66.86	Normal	Non
1.71308e+09	66.89	Normal	Non
1.71308e+09	66.93	Normal	Non
1.71308e+09	66.97	Normal	Non
1.71308e+09	67.01	Normal	Non
1.71308e+09	67.04	Normal	Non
1.71308e+09	67.07	Normal	Non
1.71308e+09	67.11	Normal	Non
1.71308e+09	67.15	Normal	Non
1.71308e+09	67.18	Normal	Non
1.71308e+09	67.21	Normal	Non
1.71308e+09	67.25	Normal	Non
1.71308e+09	67.29	Normal	Non
1.71308e+09	67.33	Normal	Non
1.71308e+09	67.36	Normal	Non
1.71308e+09	67.39	Normal	Non
1.71308e+09	67.43	Normal	Non
1.71308e+09	67.46	Normal	Non
1.71308e+09	67.5	Normal	Non
1.71308e+09	67.54	Normal	Non
1.71308e+09	67.57	Normal	Non
1.71308e+09	67.61	Normal	Non
1.71308e+09	67.64	Normal	Non
1.71308e+09	67.68	Normal	Non
1.71308e+09	67.72	Normal	Non
1.71308e+09	67.75	Normal	Non
1.71308e+09	67.79	Normal	Non
1.71308e+09	67.83	Normal	Non
1.71308e+09	67.86	Normal	Non
1.71308e+09	67.89	Normal	Non
1.71308e+09	67.93	Normal	Non
1.71308e+09	67.97	Normal	Non
1.71308e+09	68.01	Normal	Non
1.71308e+09	68.05	Normal	Non
1.71308e+09	68.1	Normal	Non
1.71308e+09	68.13	Normal	Non
1.71308e+09	68.16	Normal	Non
1.71308e+09	68.21	Normal	Non
1.71308e+09	68.26	Normal	Non
1.71308e+09	68.3	Normal	Non
1.71308e+09	68.33	Normal	Non
1.71308e+09	68.38	Normal	Non
1.71308e+09	68.42	Normal	Non
1.71308e+09	68.45	Normal	Non
1.71308e+09	68.49	Normal	Non
1.71308e+09	68.52	Normal	Non
1.71308e+09	68.57	Normal	Non
1.71308e+09	68.61	Normal	Non
1.71308e+09	68.66	Normal	Non
1.71308e+09	68.71	Normal	Non
1.71308e+09	68.75	Normal	Non
1.71308e+09	68.78	Normal	Non
1.71308e+09	68.81	Normal	Non
1.71308e+09	68.86	Normal	Non
1.71308e+09	68.91	Normal	Non
1.71308e+09	68.94	Normal	Non
1.71308e+09	68.97	Turn over	Ring
1.71308e+09	69	Normal	Non
1.71308e+09	69.05	Turn over	Ring
1.71308e+09	69.08	Turn over	Ring
1.71308e+09	69.13	Normal	Non
1.71308e+09	69.16	Normal	Non
1.71308e+09	69.19	Normal	Non
1.71308e+09	69.24	Normal	Non
1.71308e+09	69.28	Normal	Non
1.71308e+09	69.31	Normal	Non
1.71308e+09	69.36	Normal	Non
1.71308e+09	69.39	Normal	Non
1.71308e+09	69.44	Normal	Non
1.71308e+09	69.48	Normal	Non
1.71308e+09	69.53	Normal	Non
1.71308e+09	69.56	Normal	Non
1.71308e+09	69.61	Normal	Non
1.71308e+09	69.64	Normal	Non
1.71308e+09	69.69	Normal	Non
1.71308e+09	69.73	Normal	Non
1.71308e+09	69.78	Normal	Non
1.71308e+09	69.83	Normal	Non
1.71308e+09	69.87	Normal	Non
1.71308e+09	69.92	Normal	Non
1.71308e+09	69.96	Normal	Non
1.71308e+09	70	Normal	Non
1.71308e+09	70.03	Normal	Non
1.71308e+09	70.08	Normal	Non
1.71308e+09	70.11	Normal	Non
1.71308e+09	70.14	Normal	Non
1.71308e+09	70.19	Normal	Non
1.71308e+09	70.23	Normal	Non
1.71308e+09	70.28	Normal	Non
1.71308e+09	70.31	Normal	Non
1.71308e+09	70.36	Normal	Non
1.71308e+09	70.39	Normal	Non
1.71308e+09	70.44	Normal	Non
1.71308e+09	70.47	Normal	Non
1.71308e+09	70.5	Normal	Non
1.71308e+09	70.55	Normal	Non
1.71308e+09	70.59	Normal	Non
1.71308e+09	70.64	Normal	Non
1.71308e+09	70.67	Normal	Non
1.71308e+09	70.72	Normal	Non
1.71308e+09	70.76	Normal	Non
1.71308e+09	70.81	Normal	Non
1.71308e+09	70.85	Normal	Non
1.71308e+09	70.9	Normal	Non
1.71308e+09	70.95	Normal	Non
1.71308e+09	71	Normal	Non
1.71308e+09	71.04	Normal	Non
1.71308e+09	71.07	Normal	Non
1.71308e+09	71.12	Normal	Non
1.71308e+09	71.17	Normal	Non
1.71308e+09	71.22	Normal	Non
1.71308e+09	71.26	Normal	Non
1.71308e+09	71.29	Turn over	Ring
1.71308e+09	71.34	Normal	Non
1.71308e+09	71.39	Normal	Non
1.71308e+09	71.42	Normal	Non
1.71308e+09	71.47	Normal	Non
1.71308e+09	71.51	Normal	Non
1.71308e+09	71.56	Turn over	Ring
1.71308e+09	71.6	Turn over	Ring
1.71308e+09	71.65	Turn over	Ring
1.71308e+09	71.68	Turn over	Ring
1.71308e+09	71.73	Turn over	Ring
1.71308e+09	71.77	Normal	Non
1.71308e+09	71.8	Normal	Non
1.71308e+09	71.84	Turn over	Ring
1.71308e+09	71.87	Turn over	Ring
1.71308e+09	71.9	Turn over	Ring
1.71308e+09	71.93	Turn over	Ring
1.71308e+09	71.96	Turn over	Ring
1.71308e+09	72.01	Turn over	Ring
1.71308e+09	72.05	Turn over	Ring
1.71308e+09	72.08	Turn over	Ring
1.71308e+09	72.12	Turn over	Ring
1.71308e+09	72.14	Turn over	Ring
1.71308e+09	72.18	Turn over	Ring
1.71308e+09	72.21	Turn over	Ring
1.71308e+09	72.24	Turn over	Ring
1.71308e+09	72.27	Turn over	Ring
1.71308e+09	72.3	Turn over	Ring
1.71308e+09	72.33	Turn over	Ring
1.71308e+09	72.37	Turn over	Ring
1.71308e+09	72.41	Turn over	Ring
1.71308e+09	72.46	Turn over	Ring
1.71308e+09	72.49	Turn over	Ring
1.71308e+09	72.52	Turn over	Ring
1.71308e+09	72.55	Turn over	Ring
1.71308e+09	72.59	Turn over	Ring
1.71308e+09	72.62	Turn over	Ring
1.71308e+09	72.65	Turn over	Ring
1.71308e+09	72.68	Turn over	Ring
1.71308e+09	72.71	Turn over	Ring
1.71308e+09	72.74	Turn over	Ring
1.71308e+09	72.77	Turn over	Ring
1.71308e+09	72.81	Turn over	Ring
1.71308e+09	72.84	Turn over	Ring
1.71308e+09	72.87	Turn over	Ring
1.71308e+09	72.9	Turn over	Ring
1.71308e+09	72.93	Turn over	Ring
1.71308e+09	72.96	Turn over	Ring
1.71308e+09	72.99	Turn over	Ring
1.71308e+09	73.02	Turn over	Ring
1.71308e+09	73.05	Turn over	Ring
1.71308e+09	73.09	Turn over	Ring
1.71308e+09	73.13	Turn over	Ring
1.71308e+09	73.16	Turn over	Ring
1.71308e+09	73.2	Turn over	Ring
1.71308e+09	73.24	Turn over	Ring
1.71308e+09	73.27	Turn over	Ring
1.71308e+09	73.3	Turn over	Ring
1.71308e+09	73.33	Turn over	Ring
1.71308e+09	73.36	Turn over	Ring
1.71308e+09	73.39	Turn over	Ring
1.71308e+09	73.43	Turn over	Ring
1.71308e+09	73.46	Turn over	Ring
1.71308e+09	73.49	Turn over	Ring
1.71308e+09	73.53	Turn over	Ring
1.71308e+09	73.56	Turn over	Ring
1.71308e+09	73.6	Turn over	Ring
1.71308e+09	73.63	Turn over	Ring
1.71308e+09	73.66	Turn over	Ring
1.71308e+09	73.69	Turn over	Ring
1.71308e+09	73.72	Turn over	Ring
1.71308e+09	73.77	Turn over	Ring
1.71308e+09	73.8	Turn over	Ring
1.71308e+09	73.83	Turn over	Ring
1.71308e+09	73.86	Turn over	Ring
1.71308e+09	73.89	Turn over	Ring
1.71308e+09	73.93	Turn over	Ring
1.71308e+09	73.97	Turn over	Ring
1.71308e+09	74	Turn over	Ring
1.71308e+09	74.03	Turn over	Ring
1.71308e+09	74.06	Turn over	Ring
1.71308e+09	74.09	Turn over	Ring
1.71308e+09	74.12	Turn over	Ring
1.71308e+09	74.16	Turn over	Ring
1.71308e+09	74.19	Turn over	Ring
1.71308e+09	74.22	Turn over	Ring
1.71308e+09	74.25	Turn over	Ring
1.71308e+09	74.3	Turn over	Ring
1.71308e+09	74.33	Turn over	Ring
1.71308e+09	74.37	Turn over	Ring
1.71308e+09	74.41	Turn over	Ring
1.71308e+09	74.44	Turn over	Ring
1.71308e+09	74.47	Turn over	Ring
1.71308e+09	74.5	Turn over	Ring
1.71308e+09	74.53	Turn over	Ring
1.71308e+09	74.56	Turn over	Ring
1.71308e+09	74.59	Turn over	Ring
1.71308e+09	74.63	Turn over	Ring
1.71308e+09	74.66	Turn over	Ring
1.71308e+09	74.7	Turn over	Ring
1.71308e+09	74.73	Turn over	Ring
1.71308e+09	74.76	Turn over	Ring
1.71308e+09	74.79	Turn over	Ring
1.71308e+09	74.83	Turn over	Ring
1.71308e+09	74.86	Turn over	Ring
1.71308e+09	74.89	Turn over	Ring
1.71308e+09	74.94	Turn over	Ring
1.71308e+09	74.97	Turn over	Ring
1.71308e+09	75	Turn over	Ring
1.71308e+09	75.03	Turn over	Ring
1.71308e+09	75.06	Turn over	Ring
1.71308e+09	75.1	Turn over	Ring
1.71308e+09	75.14	Turn over	Ring
1.71308e+09	75.17	Turn over	Ring
1.71308e+09	75.2	Turn over	Ring
1.71308e+09	75.23	Turn over	Ring
1.71308e+09	75.26	Turn over	Ring
1.71308e+09	75.3	Turn over	Ring
1.71308e+09	75.32	Turn over	Ring
1.71308e+09	75.36	Turn over	Ring
1.71308e+09	75.39	Turn over	Ring
1.71308e+09	75.42	Turn over	Ring
1.71308e+09	75.45	Turn over	Ring
1.71308e+09	75.5	Turn over	Ring
1.71308e+09	75.54	Turn over	Ring
1.71308e+09	75.58	Turn over	Ring
1.71308e+09	75.61	Turn over	Ring
1.71308e+09	75.64	Turn over	Ring
1.71308e+09	75.67	Turn over	Ring
1.71308e+09	75.7	Turn over	Ring
1.71308e+09	75.73	Turn over	Ring
1.71308e+09	75.76	Turn over	Ring
1.71308e+09	75.79	Turn over	Ring
1.71308e+09	75.82	Turn over	Ring
1.71308e+09	75.85	Turn over	Ring
1.71308e+09	75.9	Turn over	Ring
1.71308e+09	75.93	Turn over	Ring
1.71308e+09	75.96	Turn over	Ring
1.71308e+09	75.99	Turn over	Ring
1.71308e+09	76.03	Turn over	Ring
1.71308e+09	76.06	Turn over	Ring
1.71308e+09	76.1	Turn over	Ring
1.71308e+09	76.13	Turn over	Ring
1.71308e+09	76.17	Turn over	Ring
1.71308e+09	76.2	Turn over	Ring
1.71308e+09	76.23	Turn over	Ring
1.71308e+09	76.26	Turn over	Ring
1.71308e+09	76.3	Turn over	Ring
1.71308e+09	76.34	Turn over	Ring
1.71308e+09	76.37	Turn over	Ring
1.71308e+09	76.41	Turn over	Ring
1.71308e+09	76.44	Turn over	Ring
1.71308e+09	76.48	Turn over	Ring
1.71308e+09	76.51	Turn over	Ring
1.71308e+09	76.54	Turn over	Ring
1.71308e+09	76.57	Turn over	Ring
1.71308e+09	76.6	Turn over	Ring
1.71308e+09	76.63	Turn over	Ring
1.71308e+09	76.66	Turn over	Ring
1.71308e+09	76.7	Turn over	Ring
1.71308e+09	76.74	Turn over	Ring
1.71308e+09	76.77	Turn over	Ring
1.71308e+09	76.8	Turn over	Ring
1.71308e+09	81.12	Normal	Non
1.71308e+09	81.16	Normal	Non
1.71308e+09	81.21	Normal	Non
1.71308e+09	81.24	Normal	Non
1.71308e+09	81.27	Normal	Non
1.71308e+09	81.3	Normal	Non
1.71308e+09	81.33	Normal	Non
1.71308e+09	81.36	Normal	Non
1.71308e+09	81.39	Turn over	Ring
1.71308e+09	81.43	Turn over	Ring
1.71308e+09	81.46	Normal	Non
1.71308e+09	81.49	Turn over	Ring
1.71308e+09	81.52	Normal	Non
1.71308e+09	81.56	Normal	Non
1.71308e+09	81.6	Normal	Non
1.71308e+09	81.63	Normal	Non
1.71308e+09	81.66	Normal	Non
1.71308e+09	81.69	Normal	Non
1.71308e+09	81.72	Normal	Non
1.71308e+09	81.77	Turn over	Ring
1.71308e+09	81.8	Turn over	Ring
1.71308e+09	81.83	Turn over	Ring
1.71308e+09	81.86	Turn over	Ring
1.71308e+09	81.89	Turn over	Ring
1.71308e+09	81.94	Normal	Non
1.71308e+09	81.98	Turn over	Ring
1.71308e+09	82.02	Turn over	Ring
1.71308e+09	82.06	Turn over	Ring
1.71308e+09	82.1	Turn over	Ring
1.71308e+09	82.13	Turn over	Ring
1.71308e+09	82.16	Turn over	Ring
1.71308e+09	82.19	Turn over	Ring
1.71308e+09	82.23	Turn over	Ring
1.71308e+09	82.27	Turn over	Ring
1.71308e+09	82.29	Turn over	Ring
1.71308e+09	82.33	Turn over	Ring
1.71308e+09	82.37	Turn over	Ring
1.71308e+09	82.42	Turn over	Ring
1.71308e+09	82.45	Turn over	Ring
1.71308e+09	82.5	Turn over	Ring
1.71308e+09	82.53	Turn over	Ring
1.71308e+09	82.58	Turn over	Ring
1.71308e+09	82.62	Turn over	Ring
1.71308e+09	82.67	Normal	Non
1.71308e+09	82.7	Turn over	Ring
1.71308e+09	82.74	Turn over	Ring
1.71308e+09	82.79	Turn over	Ring
1.71308e+09	82.82	Normal	Non
1.71308e+09	82.87	Normal	Non
1.71308e+09	82.92	Normal	Non
1.71308e+09	82.95	Normal	Non
1.71308e+09	82.98	Normal	Non
1.71308e+09	83.03	Normal	Non
1.71308e+09	83.06	Normal	Non
1.71308e+09	83.1	Normal	Non
1.71308e+09	83.15	Normal	Non
1.71308e+09	83.2	Normal	Non
1.71308e+09	83.24	Normal	Non
1.71308e+09	83.28	Normal	Non
1.71308e+09	83.32	Turn over	Ring
1.71308e+09	83.37	Normal	Non
1.71308e+09	83.4	Normal	Non
1.71308e+09	83.43	Normal	Non
1.71308e+09	83.48	Normal	Non
1.71308e+09	83.52	Normal	Non
1.71308e+09	83.57	Normal	Non
1.71308e+09	83.6	Normal	Non
1.71308e+09	83.65	Normal	Non
1.71308e+09	83.69	Normal	Non
1.71308e+09	83.72	Normal	Non
1.71308e+09	83.76	Normal	Non
1.71308e+09	83.79	Normal	Non
1.71308e+09	83.82	Normal	Non
1.71308e+09	83.85	Normal	Non
1.71308e+09	83.89	Normal	Non
1.71308e+09	83.93	Turn over	Ring
1.71308e+09	83.98	Normal	Non
1.71308e+09	84.02	Normal	Non
1.71308e+09	84.05	Normal	Non
1.71308e+09	84.09	Normal	Non
1.71308e+09	84.13	Normal	Non
1.71308e+09	84.16	Normal	Non
1.71308e+09	84.21	Normal	Non
1.71308e+09	84.25	Normal	Non
1.71308e+09	84.29	Normal	Non
1.71308e+09	84.32	Normal	Non
1.71308e+09	84.35	Normal	Non
1.71308e+09	84.38	Normal	Non
1.71308e+09	84.43	Normal	Non
1.71308e+09	84.46	Normal	Non
1.71308e+09	84.49	Normal	Non
1.71308e+09	84.52	Normal	Non
1.71308e+09	84.55	Turn over	Ring
1.71308e+09	84.59	Normal	Non
1.71308e+09	84.63	Normal	Non
1.71308e+09	84.66	Normal	Non
1.71308e+09	84.7	Normal	Non
1.71308e+09	84.74	Normal	Non
1.71308e+09	84.77	Normal	Non
1.71308e+09	84.81	Turn over	Ring
1.71308e+09	84.85	Normal	Non
1.71308e+09	84.89	Normal	Non
1.71308e+09	84.93	Normal	Non
1.71308e+09	84.96	Normal	Non
1.71308e+09	84.99	Normal	Non
1.71308e+09	85.04	Normal	Non
1.71308e+09	85.07	Turn over	Ring
1.71308e+09	85.1	Normal	Non
1.71308e+09	85.13	Normal	Non
1.71308e+09	85.18	Normal	Non
1.71308e+09	85.23	Normal	Non
1.71308e+09	85.27	Turn over	Ring
1.71308e+09	85.3	Normal	Non
1.71308e+09	85.33	Normal	Non
1.71308e+09	85.36	Normal	Non
1.71308e+09	85.41	Normal	Non
1.71308e+09	85.45	Normal	Non
1.71308e+09	85.5	Normal	Non
1.71308e+09	85.55	Normal	Non
1.71308e+09	85.59	Normal	Non
1.71308e+09	85.63	Normal	Non
1.71308e+09	85.67	Normal	Non
1.71308e+09	85.7	Normal	Non
1.71308e+09	85.75	Normal	Non
1.71308e+09	85.78	Normal	Non
1.71308e+09	85.81	Normal	Non
1.71308e+09	85.84	Normal	Non
1.71308e+09	85.87	Normal	Non
1.71308e+09	85.91	Normal	Non
1.71308e+09	85.95	Normal	Non
1.71308e+09	86	Normal	Non
1.71308e+09	86.05	Normal	Non
1.71308e+09	86.09	Normal	Non
1.71308e+09	86.14	Normal	Non
1.71308e+09	86.19	Normal	Non
1.71308e+09	86.23	Normal	Non
1.71308e+09	86.28	Normal	Non
1.71308e+09	86.32	Normal	Non
1.71308e+09	86.36	Normal	Non
1.71308e+09	86.4	Normal	Non
1.71308e+09	86.43	Normal	Non
1.71308e+09	86.46	Normal	Non
1.71308e+09	86.5	Normal	Non
1.71308e+09	86.54	Normal	Non
1.71308e+09	86.59	Normal	Non
1.71308e+09	86.64	Normal	Non
1.71308e+09	86.69	Normal	Non
1.71308e+09	86.73	Normal	Non
1.71308e+09	86.76	Normal	Non
1.71308e+09	86.81	Normal	Non
1.71308e+09	86.84	Turn over	Ring
1.71308e+09	86.88	Turn over	Ring
1.71308e+09	86.92	Turn over	Ring
1.71308e+09	86.97	Turn over	Ring
1.71308e+09	87.01	Normal	Non
1.71308e+09	87.06	Normal	Non
1.71308e+09	87.11	Normal	Non
1.71308e+09	87.15	Normal	Non
1.71308e+09	87.2	Normal	Non
1.71308e+09	87.23	Normal	Non
1.71308e+09	87.28	Turn over	Ring
1.71308e+09	87.31	Turn over	Ring
1.71308e+09	87.35	Turn over	Ring
1.71308e+09	87.38	Turn over	Ring
1.71308e+09	87.42	Turn over	Ring
1.71308e+09	87.46	Turn over	Ring
1.71308e+09	87.51	Normal	Non
1.71308e+09	87.55	Turn over	Ring
1.71308e+09	87.59	Turn over	Ring
1.71308e+09	87.63	Turn over	Ring
1.71308e+09	87.68	Turn over	Ring
1.71308e+09	87.71	Turn over	Ring
1.71308e+09	87.74	Turn over	Ring
1.71308e+09	87.78	Turn over	Ring
1.71308e+09	87.83	Turn over	Ring
1.71308e+09	87.87	Turn over	Ring
1.71308e+09	87.92	Turn over	Ring
1.71308e+09	87.96	Turn over	Ring
1.71308e+09	88.01	Turn over	Ring
1.71308e+09	88.06	Normal	Non
1.71308e+09	88.11	Turn over	Ring
1.71308e+09	88.14	Turn over	Ring
1.71308e+09	88.19	Turn over	Ring
1.71308e+09	88.23	Turn over	Ring
1.71308e+09	88.26	Turn over	Ring
1.71308e+09	88.3	Turn over	Ring
1.71308e+09	88.34	Turn over	Ring
1.71308e+09	88.39	Turn over	Ring
1.71308e+09	88.42	Turn over	Ring
1.71308e+09	88.46	Turn over	Ring
1.71308e+09	88.49	Turn over	Ring
1.71308e+09	88.53	Turn over	Ring
1.71308e+09	88.56	Turn over	Ring
1.71308e+09	88.61	Turn over	Ring
1.71308e+09	88.65	Turn over	Ring
1.71308e+09	88.68	Turn over	Ring
1.71308e+09	88.72	Turn over	Ring
1.71308e+09	88.76	Turn over	Ring
1.71308e+09	88.81	Turn over	Ring
1.71308e+09	88.86	Turn over	Ring
1.71308e+09	88.9	Turn over	Ring
1.71308e+09	88.93	Turn over	Ring
1.71308e+09	88.98	Turn over	Ring
1.71308e+09	89.01	Turn over	Ring
1.71308e+09	89.04	Turn over	Ring
1.71308e+09	89.08	Turn over	Ring
1.71308e+09	89.11	Turn over	Ring
1.71308e+09	89.15	Turn over	Ring
1.71308e+09	89.18	Turn over	Ring
1.71308e+09	89.23	Turn over	Ring
1.71308e+09	89.26	Turn over	Ring
1.71308e+09	89.29	Turn over	Ring
1.71308e+09	89.34	Turn over	Ring
1.71308e+09	89.39	Turn over	Ring
1.71308e+09	89.42	Turn over	Ring
1.71308e+09	89.46	Turn over	Ring
1.71308e+09	89.5	Turn over	Ring
1.71308e+09	89.53	Turn over	Ring
1.71308e+09	89.58	Turn over	Ring
1.71308e+09	89.62	Turn over	Ring
1.71308e+09	89.67	Turn over	Ring
1.71308e+09	89.71	Turn over	Ring
1.71308e+09	89.76	Turn over	Ring
1.71308e+09	89.81	Turn over	Ring
1.71308e+09	89.84	Turn over	Ring
1.71308e+09	89.87	Turn over	Ring
1.71308e+09	89.91	Turn over	Ring
1.71308e+09	89.94	Turn over	Ring
1.71308e+09	89.98	Turn over	Ring
1.71308e+09	90.01	Turn over	Ring
1.71308e+09	90.05	Turn over	Ring
[truncated: 8,001 more rows]
