# Supplementary material for: Design of a hazard prediction system with intelligent multimodal fusion based on artificial intelligence & internet of things technology: taking a crib as an example
Source: PeerJ journal article supplement (doi:10.7717/peerj-cs.2404), 2024-10-29
Supplement: Data.zip [file turning-over2.xlsx]

## Sheet: Sheet
Timestamp	RunTime(s)	BabyStatus(t)	Buzzer		B1(t)	B2(t)	ΔB(t)	t1(s)	t2(s)	Δt(s)	KB(t/s)
1.71308e+09	0	0	Non		0	1	1	0	0.04	0.04	25
1.71308e+09	0.04	1	Ring		1	1	0	0.04	0.08	0.04	0
1.71308e+09	0.08	1	Ring		1	0	-1	0.08	0.12	0.04	-25
1.71308e+09	0.12	0	Non		0	1	1	0.12	0.16	0.04	25
1.71308e+09	0.16	1	Ring		1	1	0	0.16	0.19	0.03	0
1.71308e+09	0.19	1	Ring		1	0	-1	0.19	0.22	0.03	-33.3333
1.71308e+09	0.22	0	Non		0	0	0	0.22	0.25	0.03	0
1.71308e+09	0.25	0	Non		0	0	0	0.25	0.28	0.03	0
1.71308e+09	0.28	0	Non		0	0	0	0.28	0.33	0.05	0
1.71308e+09	0.33	0	Non		0	0	0	0.33	0.36	0.03	0
1.71308e+09	0.36	0	Non		0	0	0	0.36	0.39	0.03	0
1.71308e+09	0.39	0	Non		0	1	1	0.39	0.42	0.03	33.3333
1.71308e+09	0.42	1	Ring		1	0	-1	0.42	0.47	0.05	-20
1.71308e+09	0.47	0	Non		0	0	0	0.47	0.5	0.03	0
1.71308e+09	0.5	0	Non		0	0	0	0.5	0.53	0.03	0
1.71308e+09	0.53	0	Non		0	0	0	0.53	0.57	0.04	0
1.71308e+09	0.57	0	Non		0	0	0	0.57	0.6	0.03	0
1.71308e+09	0.6	0	Non		0	0	0	0.6	0.63	0.03	0
1.71308e+09	0.63	0	Non		0	0	0	0.63	0.66	0.03	0
1.71308e+09	0.66	0	Non		0	0	0	0.66	0.69	0.03	0
1.71308e+09	0.69	0	Non		0	0	0	0.69	0.73	0.04	0
1.71308e+09	0.73	0	Non		0	0	0	0.73	0.76	0.03	0
1.71308e+09	0.76	0	Non		0	0	0	0.76	0.8	0.04	0
1.71308e+09	0.8	0	Non		0	0	0	0.8	0.83	0.03	0
1.71308e+09	0.83	0	Non		0	0	0	0.83	0.86	0.03	0
1.71308e+09	0.86	0	Non		0	0	0	0.86	0.89	0.03	0
1.71308e+09	0.89	0	Non		0	0	0	0.89	0.92	0.03	0
1.71308e+09	0.92	0	Non		0	0	0	0.92	0.95	0.03	0
1.71308e+09	0.95	0	Non		0	0	0	0.95	0.98	0.03	0
1.71308e+09	0.98	0	Non		0	0	0	0.98	1.01	0.03	0
1.71308e+09	1.01	0	Non		0	0	0	1.01	1.05	0.04	0
1.71308e+09	1.05	0	Non		0	0	0	1.05	1.08	0.03	0
1.71308e+09	1.08	0	Non		0	0	0	1.08	1.11	0.03	0
1.71308e+09	1.11	0	Non		0	0	0	1.11	1.14	0.03	0
1.71308e+09	1.14	0	Non		0	0	0	1.14	1.19	0.05	0
1.71308e+09	1.19	0	Non		0	0	0	1.19	1.22	0.03	0
1.71308e+09	1.22	0	Non		0	0	0	1.22	1.26	0.04	0
1.71308e+09	1.26	0	Non		0	0	0	1.26	1.29	0.03	0
1.71308e+09	1.29	0	Non		0	0	0	1.29	1.33	0.04	0
1.71308e+09	1.33	0	Non		0	0	0	1.33	1.37	0.04	0
1.71308e+09	1.37	0	Non		0	0	0	1.37	1.4	0.03	0
1.71308e+09	1.4	0	Non		0	0	0	1.4	1.44	0.04	0
1.71308e+09	1.44	0	Non		0	0	0	1.44	1.47	0.03	0
1.71308e+09	1.47	0	Non		0	0	0	1.47	1.51	0.04	0
1.71308e+09	1.51	0	Non		0	0	0	1.51	1.56	0.05	0
1.71308e+09	1.56	0	Non		0	0	0	1.56	1.59	0.03	0
1.71308e+09	1.59	0	Non		0	0	0	1.59	1.62	0.03	0
1.71308e+09	1.62	0	Non		0	0	0	1.62	1.66	0.04	0
1.71308e+09	1.66	0	Non		0	0	0	1.66	1.68	0.02	0
1.71308e+09	1.68	0	Non		0	0	0	1.68	1.72	0.04	0
1.71308e+09	1.72	0	Non		0	0	0	1.72	1.75	0.03	0
1.71308e+09	1.75	0	Non		0	0	0	1.75	1.79	0.04	0
1.71308e+09	1.79	0	Non		0	0	0	1.79	1.83	0.04	0
1.71308e+09	1.83	0	Non		0	0	0	1.83	1.87	0.04	0
1.71308e+09	1.87	0	Non		0	0	0	1.87	1.91	0.04	0
1.71308e+09	1.91	0	Non		0	0	0	1.91	1.95	0.04	0
1.71308e+09	1.95	0	Non		0	0	0	1.95	2	0.05	0
1.71308e+09	2	0	Non		0	0	0	2	2.03	0.03	0
1.71308e+09	2.03	0	Non		0	0	0	2.03	2.08	0.05	0
1.71308e+09	2.08	0	Non		0	0	0	2.08	2.11	0.03	0
1.71308e+09	2.11	0	Non		0	0	0	2.11	2.15	0.04	0
1.71308e+09	2.15	0	Non		0	0	0	2.15	2.2	0.05	0
1.71308e+09	2.2	0	Non		0	0	0	2.2	2.24	0.04	0
1.71308e+09	2.24	0	Non		0	0	0	2.24	2.29	0.05	0
1.71308e+09	2.29	0	Non		0	0	0	2.29	2.32	0.03	0
1.71308e+09	2.32	0	Non		0	0	0	2.32	2.35	0.03	0
1.71308e+09	2.35	0	Non		0	0	0	2.35	2.39	0.04	0
1.71308e+09	2.39	0	Non		0	0	0	2.39	2.43	0.04	0
1.71308e+09	2.43	0	Non		0	0	0	2.43	2.46	0.03	0
1.71308e+09	2.46	0	Non		0	0	0	2.46	2.49	0.03	0
1.71308e+09	2.49	0	Non		0	0	0	2.49	2.53	0.04	0
1.71308e+09	2.53	0	Non		0	0	0	2.53	2.57	0.04	0
1.71308e+09	2.57	0	Non		0	0	0	2.57	2.61	0.04	0
1.71308e+09	2.61	0	Non		0	0	0	2.61	2.65	0.04	0
1.71308e+09	2.65	0	Non		0	0	0	2.65	2.68	0.03	0
1.71308e+09	2.68	0	Non		0	0	0	2.68	2.73	0.05	0
1.71308e+09	2.73	0	Non		0	0	0	2.73	2.77	0.04	0
1.71308e+09	2.77	0	Non		0	0	0	2.77	2.81	0.04	0
1.71308e+09	2.81	0	Non		0	0	0	2.81	2.84	0.03	0
1.71308e+09	2.84	0	Non		0	0	0	2.84	2.87	0.03	0
1.71308e+09	2.87	0	Non		0	0	0	2.87	2.9	0.03	0
1.71308e+09	2.9	0	Non		0	0	0	2.9	2.93	0.03	0
1.71308e+09	2.93	0	Non		0	0	0	2.93	2.96	0.03	0
1.71308e+09	2.96	0	Non		0	0	0	2.96	2.99	0.03	0
1.71308e+09	2.99	0	Non		0	0	0	2.99	3.02	0.03	0
1.71308e+09	3.02	0	Non		0	0	0	3.02	3.06	0.04	0
1.71308e+09	3.06	0	Non		0	0	0	3.06	3.1	0.04	0
1.71308e+09	3.1	0	Non		0	0	0	3.1	3.14	0.04	0
1.71308e+09	3.14	0	Non		0	0	0	3.14	3.17	0.03	0
1.71308e+09	3.17	0	Non		0	0	0	3.17	3.2	0.03	0
1.71308e+09	3.2	0	Non		0	0	0	3.2	3.25	0.05	0
1.71308e+09	3.25	0	Non		0	0	0	3.25	3.28	0.03	0
1.71308e+09	3.28	0	Non		0	0	0	3.28	3.32	0.04	0
1.71308e+09	3.32	0	Non		0	0	0	3.32	3.35	0.03	0
1.71308e+09	3.35	0	Non		0	0	0	3.35	3.39	0.04	0
1.71308e+09	3.39	0	Non		0	0	0	3.39	3.42	0.03	0
1.71308e+09	3.42	0	Non		0	0	0	3.42	3.47	0.05	0
1.71308e+09	3.47	0	Non		0	0	0	3.47	3.51	0.04	0
1.71308e+09	3.51	0	Non		0	0	0	3.51	3.56	0.05	0
1.71308e+09	3.56	0	Non		0	0	0	3.56	3.61	0.05	0
1.71308e+09	3.61	0	Non		0	0	0	3.61	3.64	0.03	0
1.71308e+09	3.64	0	Non		0	0	0	3.64	3.69	0.05	0
1.71308e+09	3.69	0	Non		0	0	0	3.69	3.73	0.04	0
1.71308e+09	3.73	0	Non		0	0	0	3.73	3.78	0.05	0
1.71308e+09	3.78	0	Non		0	0	0	3.78	3.82	0.04	0
1.71308e+09	3.82	0	Non		0	0	0	3.82	3.85	0.03	0
1.71308e+09	3.85	0	Non		0	0	0	3.85	3.89	0.04	0
1.71308e+09	3.89	0	Non		0	0	0	3.89	3.93	0.04	0
1.71308e+09	3.93	0	Non		0	0	0	3.93	3.97	0.04	0
1.71308e+09	3.97	0	Non		0	0	0	3.97	4.01	0.04	0
1.71308e+09	4.01	0	Non		0	0	0	4.01	4.04	0.03	0
1.71308e+09	4.04	0	Non		0	0	0	4.04	4.08	0.04	0
1.71308e+09	4.08	0	Non		0	0	0	4.08	4.12	0.04	0
1.71308e+09	4.12	0	Non		0	0	0	4.12	4.15	0.03	0
1.71308e+09	4.15	0	Non		0	0	0	4.15	4.2	0.05	0
1.71308e+09	4.2	0	Non		0	0	0	4.2	4.23	0.03	0
1.71308e+09	4.23	0	Non		0	0	0	4.23	4.28	0.05	0
1.71308e+09	4.28	0	Non		0	0	0	4.28	4.32	0.04	0
1.71308e+09	4.32	0	Non		0	0	0	4.32	4.37	0.05	0
1.71308e+09	4.37	0	Non		0	0	0	4.37	4.4	0.03	0
1.71308e+09	4.4	0	Non		0	0	0	4.4	4.43	0.03	0
1.71308e+09	4.43	0	Non		0	0	0	4.43	4.46	0.03	0
1.71308e+09	4.46	0	Non		0	0	0	4.46	4.5	0.04	0
1.71308e+09	4.5	0	Non		0	0	0	4.5	4.54	0.04	0
1.71308e+09	4.54	0	Non		0	0	0	4.54	4.57	0.03	0
1.71308e+09	4.57	0	Non		0	0	0	4.57	4.62	0.05	0
1.71308e+09	4.62	0	Non		0	0	0	4.62	4.65	0.03	0
1.71308e+09	4.65	0	Non		0	0	0	4.65	4.68	0.03	0
1.71308e+09	4.68	0	Non		0	0	0	4.68	4.71	0.03	0
1.71308e+09	4.71	0	Non		0	0	0	4.71	4.74	0.03	0
1.71308e+09	4.74	0	Non		0	0	0	4.74	4.77	0.03	0
1.71308e+09	4.77	0	Non		0	0	0	4.77	4.8	0.03	0
1.71308e+09	4.8	0	Non		0	0	0	4.8	4.83	0.03	0
1.71308e+09	4.83	0	Non		0	0	0	4.83	4.88	0.05	0
1.71308e+09	4.88	0	Non		0	0	0	4.88	4.91	0.03	0
1.71308e+09	4.91	0	Non		0	0	0	4.91	4.94	0.03	0
1.71308e+09	4.94	0	Non		0	0	0	4.94	4.97	0.03	0
1.71308e+09	4.97	0	Non		0	0	0	4.97	5	0.03	0
1.71308e+09	5	0	Non		0	0	0	5	5.03	0.03	0
1.71308e+09	5.03	0	Non		0	0	0	5.03	5.07	0.04	0
1.71308e+09	5.07	0	Non		0	0	0	5.07	5.1	0.03	0
1.71308e+09	5.1	0	Non		0	0	0	5.1	5.14	0.04	0
1.71308e+09	5.14	0	Non		0	0	0	5.14	5.18	0.04	0
1.71308e+09	5.18	0	Non		0	0	0	5.18	5.21	0.03	0
1.71308e+09	5.21	0	Non		0	0	0	5.21	5.25	0.04	0
1.71308e+09	5.25	0	Non		0	0	0	5.25	5.28	0.03	0
1.71308e+09	5.28	0	Non		0	0	0	5.28	5.31	0.03	0
1.71308e+09	5.31	0	Non		0	0	0	5.31	5.34	0.03	0
1.71308e+09	5.34	0	Non		0	0	0	5.34	5.38	0.04	0
1.71308e+09	5.38	0	Non		0	0	0	5.38	5.41	0.03	0
1.71308e+09	5.41	0	Non		0	0	0	5.41	5.45	0.04	0
1.71308e+09	5.45	0	Non		0	0	0	5.45	5.49	0.04	0
1.71308e+09	5.49	0	Non		0	0	0	5.49	5.52	0.03	0
1.71308e+09	5.52	0	Non		0	0	0	5.52	5.57	0.05	0
1.71308e+09	5.57	0	Non		0	0	0	5.57	5.6	0.03	0
1.71308e+09	5.6	0	Non		0	0	0	5.6	5.63	0.03	0
1.71308e+09	5.63	0	Non		0	0	0	5.63	5.66	0.03	0
1.71308e+09	5.66	0	Non		0	0	0	5.66	5.69	0.03	0
1.71308e+09	5.69	0	Non		0	0	0	5.69	5.72	0.03	0
1.71308e+09	5.72	0	Non		0	0	0	5.72	5.75	0.03	0
1.71308e+09	5.75	0	Non		0	0	0	5.75	5.79	0.04	0
1.71308e+09	5.79	0	Non		0	0	0	5.79	5.83	0.04	0
1.71308e+09	5.83	0	Non		0	0	0	5.83	5.86	0.03	0
1.71308e+09	5.86	0	Non		0	0	0	5.86	5.9	0.04	0
1.71308e+09	5.9	0	Non		0	0	0	5.9	5.93	0.03	0
1.71308e+09	5.93	0	Non		0	0	0	5.93	5.96	0.03	0
1.71308e+09	5.96	0	Non		0	0	0	5.96	5.99	0.03	0
1.71308e+09	5.99	0	Non		0	0	0	5.99	6.02	0.03	0
1.71308e+09	6.02	0	Non		0	0	0	6.02	6.05	0.03	0
1.71308e+09	6.05	0	Non		0	0	0	6.05	6.08	0.03	0
1.71308e+09	6.08	0	Non		0	0	0	6.08	6.13	0.05	0
1.71308e+09	6.13	0	Non		0	0	0	6.13	6.16	0.03	0
1.71308e+09	6.16	0	Non		0	0	0	6.16	6.19	0.03	0
1.71308e+09	6.19	0	Non		0	0	0	6.19	6.24	0.05	0
1.71308e+09	6.24	0	Non		0	0	0	6.24	6.27	0.03	0
1.71308e+09	6.27	0	Non		0	0	0	6.27	6.3	0.03	0
1.71308e+09	6.3	0	Non		0	0	0	6.3	6.33	0.03	0
1.71308e+09	6.33	0	Non		0	0	0	6.33	6.36	0.03	0
1.71308e+09	6.36	0	Non		0	0	0	6.36	6.39	0.03	0
1.71308e+09	6.39	0	Non		0	0	0	6.39	6.42	0.03	0
1.71308e+09	6.42	0	Non		0	0	0	6.42	6.46	0.04	0
1.71308e+09	6.46	0	Non		0	0	0	6.46	6.49	0.03	0
1.71308e+09	6.49	0	Non		0	0	0	6.49	6.53	0.04	0
1.71308e+09	6.53	0	Non		0	0	0	6.53	6.56	0.03	0
1.71308e+09	6.56	0	Non		0	0	0	6.56	6.59	0.03	0
1.71308e+09	6.59	0	Non		0	0	0	6.59	6.63	0.04	0
1.71308e+09	6.63	0	Non		0	0	0	6.63	6.66	0.03	0
1.71308e+09	6.66	0	Non		0	0	0	6.66	6.69	0.03	0
1.71308e+09	6.69	0	Non		0	0	0	6.69	6.72	0.03	0
1.71308e+09	6.72	0	Non		0	0	0	6.72	6.75	0.03	0
1.71308e+09	6.75	0	Non		0	0	0	6.75	6.78	0.03	0
1.71308e+09	6.78	0	Non		0	0	0	6.78	6.83	0.05	0
1.71308e+09	6.83	0	Non		0	0	0	6.83	6.86	0.03	0
1.71308e+09	6.86	0	Non		0	0	0	6.86	6.89	0.03	0
1.71308e+09	6.89	0	Non		0	0	0	6.89	6.92	0.03	0
1.71308e+09	6.92	0	Non		0	0	0	6.92	6.95	0.03	0
1.71308e+09	6.95	0	Non		0	0	0	6.95	6.98	0.03	0
1.71308e+09	6.98	0	Non		0	0	0	6.98	7.02	0.04	0
1.71308e+09	7.02	0	Non		0	0	0	7.02	7.05	0.03	0
1.71308e+09	7.05	0	Non		0	0	0	7.05	7.08	0.03	0
1.71308e+09	7.08	0	Non		0	0	0	7.08	7.11	0.03	0
1.71308e+09	7.11	0	Non		0	0	0	7.11	7.14	0.03	0
1.71308e+09	7.14	0	Non		0	0	0	7.14	7.17	0.03	0
1.71308e+09	7.17	0	Non		0	0	0	7.17	7.21	0.04	0
1.71308e+09	7.21	0	Non		0	0	0	7.21	7.24	0.03	0
1.71308e+09	7.24	0	Non		0	0	0	7.24	7.27	0.03	0
1.71308e+09	7.27	0	Non		0	0	0	7.27	7.3	0.03	0
1.71308e+09	7.3	0	Non		0	0	0	7.3	7.33	0.03	0
1.71308e+09	7.33	0	Non		0	0	0	7.33	7.36	0.03	0
1.71308e+09	7.36	0	Non		0	0	0	7.36	7.39	0.03	0
1.71308e+09	7.39	0	Non		0	0	0	7.39	7.43	0.04	0
1.71308e+09	7.43	0	Non		0	0	0	7.43	7.47	0.04	0
1.71308e+09	7.47	0	Non		0	0	0	7.47	7.5	0.03	0
1.71308e+09	7.5	0	Non		0	0	0	7.5	7.54	0.04	0
1.71308e+09	7.54	0	Non		0	0	0	7.54	7.57	0.03	0
1.71308e+09	7.57	0	Non		0	0	0	7.57	7.6	0.03	0
1.71308e+09	7.6	0	Non		0	0	0	7.6	7.65	0.05	0
1.71308e+09	7.65	0	Non		0	0	0	7.65	7.69	0.04	0
1.71308e+09	7.69	0	Non		0	0	0	7.69	7.72	0.03	0
1.71308e+09	7.72	0	Non		0	0	0	7.72	7.75	0.03	0
1.71308e+09	7.75	0	Non		0	0	0	7.75	7.78	0.03	0
1.71308e+09	7.78	0	Non		0	0	0	7.78	7.83	0.05	0
1.71308e+09	7.83	0	Non		0	0	0	7.83	7.86	0.03	0
1.71308e+09	7.86	0	Non		0	0	0	7.86	7.91	0.05	0
1.71308e+09	7.91	0	Non		0	0	0	7.91	7.96	0.05	0
1.71308e+09	7.96	0	Non		0	0	0	7.96	8	0.04	0
1.71308e+09	8	0	Non		0	0	0	8	8.03	0.03	0
1.71308e+09	8.03	0	Non		0	0	0	8.03	8.07	0.04	0
1.71308e+09	8.07	0	Non		0	0	0	8.07	8.11	0.04	0
1.71308e+09	8.11	0	Non		0	0	0	8.11	8.14	0.03	0
1.71308e+09	8.14	0	Non		0	0	0	8.14	8.19	0.05	0
1.71308e+09	8.19	0	Non		0	0	0	8.19	8.22	0.03	0
1.71308e+09	8.22	0	Non		0	0	0	8.22	8.26	0.04	0
1.71308e+09	8.26	0	Non		0	0	0	8.26	8.3	0.04	0
1.71308e+09	8.3	0	Non		0	0	0	8.3	8.35	0.05	0
1.71308e+09	8.35	0	Non		0	0	0	8.35	8.39	0.04	0
1.71308e+09	8.39	0	Non		0	0	0	8.39	8.44	0.05	0
1.71308e+09	8.44	0	Non		0	0	0	8.44	8.48	0.04	0
1.71308e+09	8.48	0	Non		0	0	0	8.48	8.52	0.04	0
1.71308e+09	8.52	0	Non		0	0	0	8.52	8.56	0.04	0
1.71308e+09	8.56	0	Non		0	0	0	8.56	8.6	0.04	0
1.71308e+09	8.6	0	Non		0	0	0	8.6	8.64	0.04	0
1.71308e+09	8.64	0	Non		0	0	0	8.64	8.7	0.06	0
1.71308e+09	8.7	0	Non		0	0	0	8.7	8.73	0.03	0
1.71308e+09	8.73	0	Non		0	0	0	8.73	8.77	0.04	0
1.71308e+09	8.77	0	Non		0	0	0	8.77	8.8	0.03	0
1.71308e+09	8.8	0	Non		0	0	0	8.8	8.83	0.03	0
1.71308e+09	8.83	0	Non		0	0	0	8.83	8.87	0.04	0
1.71308e+09	8.87	0	Non		0	0	0	8.87	8.91	0.04	0
1.71308e+09	8.91	0	Non		0	0	0	8.91	8.95	0.04	0
1.71308e+09	8.95	0	Non		0	0	0	8.95	9	0.05	0
1.71308e+09	9	0	Non		0	0	0	9	9.05	0.05	0
1.71308e+09	9.05	0	Non		0	0	0	9.05	9.1	0.05	0
1.71308e+09	9.1	0	Non		0	0	0	9.1	9.14	0.04	0
1.71308e+09	9.14	0	Non		0	0	0	9.14	9.19	0.05	0
1.71308e+09	9.19	0	Non		0	0	0	9.19	9.23	0.04	0
1.71308e+09	9.23	0	Non		0	0	0	9.23	9.27	0.04	0
1.71308e+09	9.27	0	Non		0	0	0	9.27	9.31	0.04	0
1.71308e+09	9.31	0	Non		0	0	0	9.31	9.36	0.05	0
1.71308e+09	9.36	0	Non		0	0	0	9.36	9.41	0.05	0
1.71308e+09	9.41	0	Non		0	0	0	9.41	9.44	0.03	0
1.71308e+09	9.44	0	Non		0	0	0	9.44	9.48	0.04	0
1.71308e+09	9.48	0	Non		0	0	0	9.48	9.52	0.04	0
1.71308e+09	9.52	0	Non		0	0	0	9.52	9.55	0.03	0
1.71308e+09	9.55	0	Non		0	0	0	9.55	9.58	0.03	0
1.71308e+09	9.58	0	Non		0	0	0	9.58	9.63	0.05	0
1.71308e+09	9.63	0	Non		0	0	0	9.63	9.67	0.04	0
1.71308e+09	9.67	0	Non		0	0	0	9.67	9.71	0.04	0
1.71308e+09	9.71	0	Non		0	0	0	9.71	9.75	0.04	0
1.71308e+09	9.75	0	Non		0	1	1	9.75	9.79	0.04	25
1.71308e+09	9.79	1	Ring		1	0	-1	9.79	9.83	0.04	-25
1.71308e+09	9.83	0	Non		0	0	0	9.83	9.88	0.05	0
1.71308e+09	9.88	0	Non		0	0	0	9.88	9.92	0.04	0
1.71308e+09	9.92	0	Non		0	0	0	9.92	9.97	0.05	0
1.71308e+09	9.97	0	Non		0	0	0	9.97	10.02	0.05	0
1.71308e+09	10.02	0	Non		0	0	0	10.02	10.06	0.04	0
1.71308e+09	10.06	0	Non		0	0	0	10.06	10.11	0.05	0
1.71308e+09	10.11	0	Non		0	0	0	10.11	10.14	0.03	0
1.71308e+09	10.14	0	Non		0	0	0	10.14	10.19	0.05	0
1.71308e+09	10.19	0	Non		0	0	0	10.19	10.23	0.04	0
1.71308e+09	10.23	0	Non		0	0	0	10.23	10.28	0.05	0
1.71308e+09	10.28	0	Non		0	0	0	10.28	10.33	0.05	0
1.71308e+09	10.33	0	Non		0	0	0	10.33	10.37	0.04	0
1.71308e+09	10.37	0	Non		0	0	0	10.37	10.4	0.03	0
1.71308e+09	10.4	0	Non		0	0	0	10.4	10.43	0.03	0
1.71308e+09	10.43	0	Non		0	0	0	10.43	10.47	0.04	0
1.71308e+09	10.47	0	Non		0	0	0	10.47	10.51	0.04	0
1.71308e+09	10.51	0	Non		0	0	0	10.51	10.54	0.03	0
1.71308e+09	10.54	0	Non		0	0	0	10.54	10.59	0.05	0
1.71308e+09	10.59	0	Non		0	0	0	10.59	10.64	0.05	0
1.71308e+09	10.64	0	Non		0	0	0	10.64	10.68	0.04	0
1.71308e+09	10.68	0	Non		0	0	0	10.68	10.72	0.04	0
1.71308e+09	10.72	0	Non		0	0	0	10.72	10.76	0.04	0
1.71308e+09	10.76	0	Non		0	0	0	10.76	10.81	0.05	0
1.71308e+09	10.81	0	Non		0	0	0	10.81	10.85	0.04	0
1.71308e+09	10.85	0	Non		0	0	0	10.85	10.88	0.03	0
1.71308e+09	10.88	0	Non		0	0	0	10.88	10.92	0.04	0
1.71308e+09	10.92	0	Non		0	0	0	10.92	10.95	0.03	0
1.71308e+09	10.95	0	Non		0	0	0	10.95	10.99	0.04	0
1.71308e+09	10.99	0	Non		0	0	0	10.99	11.02	0.03	0
1.71308e+09	11.02	0	Non		0	0	0	11.02	11.06	0.04	0
1.71308e+09	11.06	0	Non		0	0	0	11.06	11.1	0.04	0
1.71308e+09	11.1	0	Non		0	0	0	11.1	11.14	0.04	0
1.71308e+09	11.14	0	Non		0	0	0	11.14	11.18	0.04	0
1.71308e+09	11.18	0	Non		0	1	1	11.18	11.22	0.04	25
1.71308e+09	11.22	1	Ring		1	0	-1	11.22	11.27	0.05	-20
1.71308e+09	11.27	0	Non		0	1	1	11.27	11.31	0.04	25
1.71308e+09	11.31	1	Ring		1	1	0	11.31	11.36	0.05	0
1.71308e+09	11.36	1	Ring		1	0	-1	11.36	11.4	0.04	-25
1.71308e+09	11.4	0	Non		0	0	0	11.4	11.45	0.05	0
1.71308e+09	11.45	0	Non		0	0	0	11.45	11.48	0.03	0
1.71308e+09	11.48	0	Non		0	0	0	11.48	11.53	0.05	0
1.71308e+09	11.53	0	Non		0	0	0	11.53	11.57	0.04	0
1.71308e+09	11.57	0	Non		0	0	0	11.57	11.62	0.05	0
1.71308e+09	11.62	0	Non		0	0	0	11.62	11.66	0.04	0
1.71308e+09	11.66	0	Non		0	0	0	11.66	11.7	0.04	0
1.71308e+09	11.7	0	Non		0	0	0	11.7	11.74	0.04	0
1.71308e+09	11.74	0	Non		0	0	0	11.74	11.78	0.04	0
1.71308e+09	11.78	0	Non		0	0	0	11.78	11.82	0.04	0
1.71308e+09	11.82	0	Non		0	0	0	11.82	11.86	0.04	0
1.71308e+09	11.86	0	Non		0	0	0	11.86	11.9	0.04	0
1.71308e+09	11.9	0	Non		0	0	0	11.9	11.95	0.05	0
1.71308e+09	11.95	0	Non		0	0	0	11.95	12	0.05	0
1.71308e+09	12	0	Non		0	0	0	12	12.04	0.04	0
1.71308e+09	12.04	0	Non		0	0	0	12.04	12.07	0.03	0
1.71308e+09	12.07	0	Non		0	0	0	12.07	12.12	0.05	0
1.71308e+09	12.12	0	Non		0	0	0	12.12	12.16	0.04	0
1.71308e+09	12.16	0	Non		0	0	0	12.16	12.21	0.05	0
1.71308e+09	12.21	0	Non		0	0	0	12.21	12.24	0.03	0
1.71308e+09	12.24	0	Non		0	0	0	12.24	12.29	0.05	0
1.71308e+09	12.29	0	Non		0	0	0	12.29	12.32	0.03	0
1.71308e+09	12.32	0	Non		0	0	0	12.32	12.37	0.05	0
1.71308e+09	12.37	0	Non		0	0	0	12.37	12.41	0.04	0
1.71308e+09	12.41	0	Non		0	0	0	12.41	12.44	0.03	0
1.71308e+09	12.44	0	Non		0	0	0	12.44	12.47	0.03	0
1.71308e+09	12.47	0	Non		0	0	0	12.47	12.52	0.05	0
1.71308e+09	12.52	0	Non		0	0	0	12.52	12.57	0.05	0
1.71308e+09	12.57	0	Non		0	0	0	12.57	12.61	0.04	0
1.71308e+09	12.61	0	Non		0	0	0	12.61	12.64	0.03	0
1.71308e+09	12.64	0	Non		0	0	0	12.64	12.67	0.03	0
1.71308e+09	12.67	0	Non		0	0	0	12.67	12.72	0.05	0
1.71308e+09	12.72	0	Non		0	0	0	12.72	12.75	0.03	0
1.71308e+09	12.75	0	Non		0	0	0	12.75	12.8	0.05	0
1.71308e+09	12.8	0	Non		0	1	1	12.8	12.83	0.03	33.3333
1.71308e+09	12.83	1	Ring		1	0	-1	12.83	12.88	0.05	-20
1.71308e+09	12.88	0	Non		0	0	0	12.88	12.91	0.03	0
1.71308e+09	12.91	0	Non		0	1	1	12.91	12.94	0.03	33.3333
1.71308e+09	12.94	1	Ring		1	1	0	12.94	12.97	0.03	0
1.71308e+09	12.97	1	Ring		1	1	0	12.97	13	0.03	0
1.71308e+09	13	1	Ring		1	1	0	13	13.05	0.05	0
1.71308e+09	13.05	1	Ring		1	1	0	13.05	13.09	0.04	0
1.71308e+09	13.09	1	Ring		1	1	0	13.09	13.13	0.04	0
1.71308e+09	13.13	1	Ring		1	1	0	13.13	13.17	0.04	0
1.71308e+09	13.17	1	Ring		1	1	0	13.17	13.2	0.03	0
1.71308e+09	13.2	1	Ring		1	1	0	13.2	13.23	0.03	0
1.71308e+09	13.23	1	Ring		1	1	0	13.23	13.26	0.03	0
1.71308e+09	13.26	1	Ring		1	1	0	13.26	13.29	0.03	0
1.71308e+09	13.29	1	Ring		1	1	0	13.29	13.32	0.03	0
1.71308e+09	13.32	1	Ring		1	1	0	13.32	13.36	0.04	0
1.71308e+09	13.36	1	Ring		1	1	0	13.36	13.39	0.03	0
1.71308e+09	13.39	1	Ring		1	1	0	13.39	13.42	0.03	0
1.71308e+09	13.42	1	Ring		1	1	0	13.42	13.45	0.03	0
1.71308e+09	13.45	1	Ring		1	1	0	13.45	13.48	0.03	0
1.71308e+09	13.48	1	Ring		1	1	0	13.48	13.51	0.03	0
1.71308e+09	13.51	1	Ring		1	1	0	13.51	13.56	0.05	0
1.71308e+09	13.56	1	Ring		1	1	0	13.56	13.59	0.03	0
1.71308e+09	13.59	1	Ring		1	1	0	13.59	13.62	0.03	0
1.71308e+09	13.62	1	Ring		1	1	0	13.62	13.66	0.04	0
1.71308e+09	13.66	1	Ring		1	1	0	13.66	13.69	0.03	0
1.71308e+09	13.69	1	Ring		1	1	0	13.69	13.72	0.03	0
1.71308e+09	13.72	1	Ring		1	1	0	13.72	13.77	0.05	0
1.71308e+09	13.77	1	Ring		1	1	0	13.77	13.8	0.03	0
1.71308e+09	13.8	1	Ring		1	1	0	13.8	13.83	0.03	0
1.71308e+09	13.83	1	Ring		1	1	0	13.83	13.86	0.03	0
1.71308e+09	13.86	1	Ring		1	1	0	13.86	13.89	0.03	0
1.71308e+09	13.89	1	Ring		1	1	0	13.89	13.92	0.03	0
1.71308e+09	13.92	1	Ring		1	1	0	13.92	13.97	0.05	0
1.71308e+09	13.97	1	Ring		1	1	0	13.97	14	0.03	0
1.71308e+09	14	1	Ring		1	1	0	14	14.03	0.03	0
1.71308e+09	14.03	1	Ring		1	1	0	14.03	14.06	0.03	0
1.71308e+09	14.06	1	Ring		1	1	0	14.06	14.09	0.03	0
1.71308e+09	14.09	1	Ring		1	1	0	14.09	14.12	0.03	0
1.71308e+09	14.12	1	Ring		1	1	0	14.12	14.16	0.04	0
1.71308e+09	14.16	1	Ring		1	1	0	14.16	14.19	0.03	0
1.71308e+09	14.19	1	Ring		1	1	0	14.19	14.22	0.03	0
1.71308e+09	14.22	1	Ring		1	1	0	14.22	14.25	0.03	0
1.71308e+09	14.25	1	Ring		1	1	0	14.25	14.28	0.03	0
1.71308e+09	14.28	1	Ring		1	1	0	14.28	14.33	0.05	0
1.71308e+09	14.33	1	Ring		1	1	0	14.33	14.36	0.03	0
1.71308e+09	14.36	1	Ring		1	1	0	14.36	14.4	0.04	0
1.71308e+09	14.4	1	Ring		1	1	0	14.4	14.43	0.03	0
1.71308e+09	14.43	1	Ring		1	1	0	14.43	14.46	0.03	0
1.71308e+09	14.46	1	Ring		1	1	0	14.46	14.5	0.04	0
1.71308e+09	14.5	1	Ring		1	1	0	14.5	14.53	0.03	0
1.71308e+09	14.53	1	Ring		1	1	0	14.53	14.57	0.04	0
1.71308e+09	14.57	1	Ring		1	1	0	14.57	14.61	0.04	0
1.71308e+09	14.61	1	Ring		1	1	0	14.61	14.64	0.03	0
1.71308e+09	14.64	1	Ring		1	1	0	14.64	14.67	0.03	0
1.71308e+09	14.67	1	Ring		1	1	0	14.67	14.7	0.03	0
1.71308e+09	14.7	1	Ring		1	1	0	14.7	14.73	0.03	0
1.71308e+09	14.73	1	Ring		1	1	0	14.73	14.77	0.04	0
1.71308e+09	14.77	1	Ring		1	1	0	14.77	14.8	0.03	0
1.71308e+09	14.8	1	Ring		1	1	0	14.8	14.83	0.03	0
1.71308e+09	14.83	1	Ring		1	1	0	14.83	14.86	0.03	0
1.71308e+09	14.86	1	Ring		1	1	0	14.86	14.89	0.03	0
1.71308e+09	14.89	1	Ring		1	1	0	14.89	14.92	0.03	0
1.71308e+09	14.92	1	Ring		1	1	0	14.92	14.97	0.05	0
1.71308e+09	14.97	1	Ring		1	1	0	14.97	15	0.03	0
1.71308e+09	15	1	Ring		1	1	0	15	15.03	0.03	0
1.71308e+09	15.03	1	Ring		1	1	0	15.03	15.06	0.03	0
1.71308e+09	15.06	1	Ring		1	1	0	15.06	15.09	0.03	0
1.71308e+09	15.09	1	Ring		1	1	0	15.09	15.13	0.04	0
1.71308e+09	15.13	1	Ring		1	1	0	15.13	15.17	0.04	0
1.71308e+09	15.17	1	Ring		1	1	0	15.17	15.2	0.03	0
1.71308e+09	15.2	1	Ring		1	1	0	15.2	15.23	0.03	0
1.71308e+09	15.23	1	Ring		1	1	0	15.23	15.26	0.03	0
1.71308e+09	15.26	1	Ring		1	1	0	15.26	15.29	0.03	0
1.71308e+09	15.29	1	Ring		1	1	0	15.29	15.34	0.05	0
1.71308e+09	15.34	1	Ring		1	1	0	15.34	15.37	0.03	0
1.71308e+09	15.37	1	Ring		1	1	0	15.37	15.4	0.03	0
1.71308e+09	15.4	1	Ring		1	1	0	15.4	15.43	0.03	0
1.71308e+09	15.43	1	Ring		1	1	0	15.43	15.46	0.03	0
1.71308e+09	15.46	1	Ring		1	1	0	15.46	15.49	0.03	0
1.71308e+09	15.49	1	Ring		1	1	0	15.49	15.53	0.04	0
1.71308e+09	15.53	1	Ring		1	1	0	15.53	15.57	0.04	0
1.71308e+09	15.57	1	Ring		1	1	0	15.57	15.6	0.03	0
1.71308e+09	15.6	1	Ring		1	1	0	15.6	15.63	0.03	0
1.71308e+09	15.63	1	Ring		1	1	0	15.63	15.66	0.03	0
1.71308e+09	15.66	1	Ring		1	1	0	15.66	15.69	0.03	0
1.71308e+09	15.69	1	Ring		1	1	0	15.69	15.73	0.04	0
1.71308e+09	15.73	1	Ring		1	1	0	15.73	15.76	0.03	0
1.71308e+09	15.76	1	Ring		1	1	0	15.76	15.79	0.03	0
1.71308e+09	15.79	1	Ring		1	1	0	15.79	15.82	0.03	0
1.71308e+09	15.82	1	Ring		1	1	0	15.82	15.85	0.03	0
1.71308e+09	15.85	1	Ring		1	1	0	15.85	15.89	0.04	0
1.71308e+09	15.89	1	Ring		1	1	0	15.89	15.93	0.04	0
1.71308e+09	15.93	1	Ring		1	1	0	15.93	15.97	0.04	0
1.71308e+09	15.97	1	Ring		1	1	0	15.97	16.01	0.04	0
1.71308e+09	16.01	1	Ring		1	1	0	16.01	16.04	0.03	0
1.71308e+09	16.04	1	Ring		1	1	0	16.04	16.07	0.03	0
1.71308e+09	16.07	1	Ring		1	1	0	16.07	16.1	0.03	0
1.71308e+09	16.1	1	Ring		1	1	0	16.1	16.13	0.03	0
1.71308e+09	16.13	1	Ring		1	1	0	16.13	16.16	0.03	0
1.71308e+09	16.16	1	Ring		1	1	0	16.16	16.19	0.03	0
1.71308e+09	16.19	1	Ring		1	1	0	16.19	16.22	0.03	0
1.71308e+09	16.22	1	Ring		1	1	0	16.22	16.25	0.03	0
1.71308e+09	16.25	1	Ring		1	1	0	16.25	16.29	0.04	0
1.71308e+09	16.29	1	Ring		1	1	0	16.29	16.33	0.04	0
1.71308e+09	16.33	1	Ring		1	1	0	16.33	16.38	0.05	0
1.71308e+09	16.38	1	Ring		1	1	0	16.38	16.41	0.03	0
1.71308e+09	16.41	1	Ring		1	1	0	16.41	16.44	0.03	0
1.71308e+09	16.44	1	Ring		1	1	0	16.44	16.47	0.03	0
1.71308e+09	16.47	1	Ring		1	1	0	16.47	16.5	0.03	0
1.71308e+09	16.5	1	Ring		1	1	0	16.5	16.53	0.03	0
1.71308e+09	16.53	1	Ring		1	1	0	16.53	16.56	0.03	0
1.71308e+09	16.56	1	Ring		1	1	0	16.56	16.59	0.03	0
1.71308e+09	16.59	1	Ring		1	1	0	16.59	16.62	0.03	0
1.71308e+09	16.62	1	Ring		1	1	0	16.62	16.66	0.04	0
1.71308e+09	16.66	1	Ring		1	1	0	16.66	16.69	0.03	0
1.71308e+09	16.69	1	Ring		1	1	0	16.69	16.73	0.04	0
1.71308e+09	16.73	1	Ring		1	1	0	16.73	16.76	0.03	0
1.71308e+09	16.76	1	Ring		1	1	0	16.76	16.8	0.04	0
1.71308e+09	16.8	1	Ring		1	1	0	16.8	16.83	0.03	0
1.71308e+09	16.83	1	Ring		1	1	0	16.83	16.86	0.03	0
1.71308e+09	16.86	1	Ring		1	1	0	16.86	16.89	0.03	0
1.71308e+09	16.89	1	Ring		1	1	0	16.89	16.94	0.05	0
1.71308e+09	16.94	1	Ring		1	1	0	16.94	16.97	0.03	0
1.71308e+09	16.97	1	Ring		1	1	0	16.97	17	0.03	0
1.71308e+09	17	1	Ring		1	1	0	17	17.03	0.03	0
1.71308e+09	17.03	1	Ring		1	1	0	17.03	17.06	0.03	0
1.71308e+09	17.06	1	Ring		1	1	0	17.06	17.1	0.04	0
1.71308e+09	17.1	1	Ring		1	1	0	17.1	17.14	0.04	0
1.71308e+09	17.14	1	Ring		1	1	0	17.14	17.17	0.03	0
1.71308e+09	17.17	1	Ring		1	1	0	17.17	17.2	0.03	0
1.71308e+09	17.2	1	Ring		1	1	0	17.2	17.23	0.03	0
1.71308e+09	17.23	1	Ring		1	1	0	17.23	17.26	0.03	0
1.71308e+09	17.26	1	Ring		1	1	0	17.26	17.3	0.04	0
1.71308e+09	17.3	1	Ring		1	1	0	17.3	17.33	0.03	0
1.71308e+09	17.33	1	Ring		1	1	0	17.33	17.37	0.04	0
1.71308e+09	17.37	1	Ring		1	1	0	17.37	17.4	0.03	0
1.71308e+09	17.4	1	Ring		1	1	0	17.4	17.43	0.03	0
1.71308e+09	17.43	1	Ring		1	1	0	17.43	17.46	0.03	0
1.71308e+09	17.46	1	Ring		1	1	0	17.46	17.5	0.04	0
1.71308e+09	17.5	1	Ring		1	1	0	17.5	17.54	0.04	0
1.71308e+09	17.54	1	Ring		1	1	0	17.54	17.58	0.04	0
1.71308e+09	17.58	1	Ring		1	1	0	17.58	17.61	0.03	0
1.71308e+09	17.61	1	Ring		1	1	0	17.61	17.64	0.03	0
1.71308e+09	17.64	1	Ring		1	1	0	17.64	17.67	0.03	0
1.71308e+09	17.67	1	Ring		1	1	0	17.67	17.7	0.03	0
1.71308e+09	17.7	1	Ring		1	1	0	17.7	17.73	0.03	0
1.71308e+09	17.73	1	Ring		1	1	0	17.73	17.76	0.03	0
1.71308e+09	17.76	1	Ring		1	1	0	17.76	17.79	0.03	0
1.71308e+09	17.79	1	Ring		1	1	0	17.79	17.83	0.04	0
1.71308e+09	17.83	1	Ring		1	1	0	17.83	17.86	0.03	0
1.71308e+09	17.86	1	Ring		1	1	0	17.86	17.9	0.04	0
1.71308e+09	17.9	1	Ring		1	1	0	17.9	17.94	0.04	0
1.71308e+09	17.94	1	Ring		1	0	-1	17.94	22.27	4.33	-0.230947
1.71308e+09	22.27	0	Non		0	1	1	22.27	22.31	0.04	25
1.71308e+09	22.31	1	Ring		1	1	0	22.31	22.34	0.03	0
1.71308e+09	22.34	1	Ring		1	1	0	22.34	22.37	0.03	0
1.71308e+09	22.37	1	Ring		1	1	0	22.37	22.4	0.03	0
1.71308e+09	22.4	1	Ring		1	0	-1	22.4	22.43	0.03	-33.3333
1.71308e+09	22.43	0	Non		0	0	0	22.43	22.46	0.03	0
1.71308e+09	22.46	0	Non		0	1	1	22.46	22.49	0.03	33.3333
1.71308e+09	22.49	1	Ring		1	1	0	22.49	22.52	0.03	0
1.71308e+09	22.52	1	Ring		1	1	0	22.52	22.56	0.04	0
1.71308e+09	22.56	1	Ring		1	1	0	22.56	22.59	0.03	0
1.71308e+09	22.59	1	Ring		1	1	0	22.59	22.63	0.04	0
1.71308e+09	22.63	1	Ring		1	1	0	22.63	22.67	0.04	0
1.71308e+09	22.67	1	Ring		1	0	-1	22.67	22.7	0.03	-33.3333
1.71308e+09	22.7	0	Non		0	1	1	22.7	22.73	0.03	33.3333
1.71308e+09	22.73	1	Ring		1	0	-1	22.73	22.76	0.03	-33.3333
1.71308e+09	22.76	0	Non		0	1	1	22.76	22.8	0.04	25
1.71308e+09	22.8	1	Ring		1	1	0	22.8	22.84	0.04	0
1.71308e+09	22.84	1	Ring		1	1	0	22.84	22.87	0.03	0
1.71308e+09	22.87	1	Ring		1	1	0	22.87	22.9	0.03	0
1.71308e+09	22.9	1	Ring		1	1	0	22.9	22.93	0.03	0
1.71308e+09	22.93	1	Ring		1	1	0	22.93	22.96	0.03	0
1.71308e+09	22.96	1	Ring		1	1	0	22.96	23	0.04	0
1.71308e+09	23	1	Ring		1	1	0	23	23.03	0.03	0
1.71308e+09	23.03	1	Ring		1	1	0	23.03	23.06	0.03	0
1.71308e+09	23.06	1	Ring		1	1	0	23.06	23.11	0.05	0
1.71308e+09	23.11	1	Ring		1	1	0	23.11	23.15	0.04	0
1.71308e+09	23.15	1	Ring		1	1	0	23.15	23.18	0.03	0
1.71308e+09	23.18	1	Ring		1	1	0	23.18	23.23	0.05	0
1.71308e+09	23.23	1	Ring		1	1	0	23.23	23.26	0.03	0
1.71308e+09	23.26	1	Ring		1	1	0	23.26	23.29	0.03	0
1.71308e+09	23.29	1	Ring		1	1	0	23.29	23.32	0.03	0
1.71308e+09	23.32	1	Ring		1	1	0	23.32	23.36	0.04	0
1.71308e+09	23.36	1	Ring		1	0	-1	23.36	23.39	0.03	-33.3333
1.71308e+09	23.39	0	Non		0	0	0	23.39	23.42	0.03	0
1.71308e+09	23.42	0	Non		0	0	0	23.42	23.45	0.03	0
1.71308e+09	23.45	0	Non		0	0	0	23.45	23.5	0.05	0
1.71308e+09	23.5	0	Non		0	0	0	23.5	23.53	0.03	0
1.71308e+09	23.53	0	Non		0	0	0	23.53	23.56	0.03	0
1.71308e+09	23.56	0	Non		0	1	1	23.56	23.59	0.03	33.3333
1.71308e+09	23.59	1	Ring		1	1	0	23.59	23.64	0.05	0
1.71308e+09	23.64	1	Ring		1	1	0	23.64	23.67	0.03	0
1.71308e+09	23.67	1	Ring		1	1	0	23.67	23.7	0.03	0
1.71308e+09	23.7	1	Ring		1	0	-1	23.7	23.73	0.03	-33.3333
1.71308e+09	23.73	0	Non		0	0	0	23.73	23.76	0.03	0
1.71308e+09	23.76	0	Non		0	1	1	23.76	23.79	0.03	33.3333
1.71308e+09	23.79	1	Ring		1	1	0	23.79	23.82	0.03	0
1.71308e+09	23.82	1	Ring		1	1	0	23.82	23.85	0.03	0
1.71308e+09	23.85	1	Ring		1	1	0	23.85	23.88	0.03	0
1.71308e+09	23.88	1	Ring		1	1	0	23.88	23.91	0.03	0
1.71308e+09	23.91	1	Ring		1	1	0	23.91	23.95	0.04	0
1.71308e+09	23.95	1	Ring		1	1	0	23.95	23.98	0.03	0
1.71308e+09	23.98	1	Ring		1	1	0	23.98	24.01	0.03	0
1.71308e+09	24.01	1	Ring		1	1	0	24.01	24.04	0.03	0
1.71308e+09	24.04	1	Ring		1	1	0	24.04	24.07	0.03	0
1.71308e+09	24.07	1	Ring		1	1	0	24.07	24.12	0.05	0
1.71308e+09	24.12	1	Ring		1	1	0	24.12	24.15	0.03	0
1.71308e+09	24.15	1	Ring		1	1	0	24.15	24.18	0.03	0
1.71308e+09	24.18	1	Ring		1	1	0	24.18	24.21	0.03	0
1.71308e+09	24.21	1	Ring		1	1	0	24.21	24.24	0.03	0
1.71308e+09	24.24	1	Ring		1	1	0	24.24	24.27	0.03	0
1.71308e+09	24.27	1	Ring		1	1	0	24.27	24.3	0.03	0
1.71308e+09	24.3	1	Ring		1	1	0	24.3	24.33	0.03	0
1.71308e+09	24.33	1	Ring		1	1	0	24.33	24.37	0.04	0
1.71308e+09	24.37	1	Ring		1	0	-1	24.37	24.4	0.03	-33.3333
1.71308e+09	24.4	0	Non		0	0	0	24.4	24.43	0.03	0
1.71308e+09	24.43	0	Non		0	0	0	24.43	24.46	0.03	0
1.71308e+09	24.46	0	Non		0	1	1	24.46	24.49	0.03	33.3333
1.71308e+09	24.49	1	Ring		1	0	-1	24.49	24.52	0.03	-33.3333
1.71308e+09	24.52	0	Non		0	0	0	24.52	24.56	0.04	0
1.71308e+09	24.56	0	Non		0	0	0	24.56	24.6	0.04	0
1.71308e+09	24.6	0	Non		0	1	1	24.6	24.63	0.03	33.3333
1.71308e+09	24.63	1	Ring		1	1	0	24.63	24.68	0.05	0
1.71308e+09	24.68	1	Ring		1	1	0	24.68	24.71	0.03	0
1.71308e+09	24.71	1	Ring		1	1	0	24.71	24.76	0.05	0
1.71308e+09	24.76	1	Ring		1	0	-1	24.76	24.8	0.04	-25
1.71308e+09	24.8	0	Non		0	0	0	24.8	24.83	0.03	0
1.71308e+09	24.83	0	Non		0	0	0	24.83	24.86	0.03	0
1.71308e+09	24.86	0	Non		0	0	0	24.86	24.89	0.03	0
1.71308e+09	24.89	0	Non		0	0	0	24.89	24.93	0.04	0
1.71308e+09	24.93	0	Non		0	1	1	24.93	24.96	0.03	33.3333
1.71308e+09	24.96	1	Ring		1	0	-1	24.96	24.99	0.03	-33.3333
1.71308e+09	24.99	0	Non		0	0	0	24.99	25.02	0.03	0
1.71308e+09	25.02	0	Non		0	0	0	25.02	25.05	0.03	0
1.71308e+09	25.05	0	Non		0	0	0	25.05	25.08	0.03	0
1.71308e+09	25.08	0	Non		0	1	1	25.08	25.11	0.03	33.3333
1.71308e+09	25.11	1	Ring		1	0	-1	25.11	25.14	0.03	-33.3333
1.71308e+09	25.14	0	Non		0	1	1	25.14	25.17	0.03	33.3333
1.71308e+09	25.17	1	Ring		1	1	0	25.17	25.21	0.04	0
1.71308e+09	25.21	1	Ring		1	1	0	25.21	25.24	0.03	0
1.71308e+09	25.24	1	Ring		1	1	0	25.24	25.27	0.03	0
1.71308e+09	25.27	1	Ring		1	1	0	25.27	25.3	0.03	0
1.71308e+09	25.3	1	Ring		1	1	0	25.3	25.33	0.03	0
1.71308e+09	25.33	1	Ring		1	1	0	25.33	25.36	0.03	0
1.71308e+09	25.36	1	Ring		1	1	0	25.36	25.39	0.03	0
1.71308e+09	25.39	1	Ring		1	1	0	25.39	25.42	0.03	0
1.71308e+09	25.42	1	Ring		1	1	0	25.42	25.45	0.03	0
1.71308e+09	25.45	1	Ring		1	0	-1	25.45	25.48	0.03	-33.3333
1.71308e+09	25.48	0	Non		0	1	1	25.48	25.52	0.04	25
1.71308e+09	25.52	1	Ring		1	1	0	25.52	25.56	0.04	0
1.71308e+09	25.56	1	Ring		1	1	0	25.56	25.6	0.04	0
1.71308e+09	25.6	1	Ring		1	1	0	25.6	25.63	0.03	0
1.71308e+09	25.63	1	Ring		1	1	0	25.63	25.66	0.03	0
1.71308e+09	25.66	1	Ring		1	1	0	25.66	25.69	0.03	0
1.71308e+09	25.69	1	Ring		1	0	-1	25.69	25.72	0.03	-33.3333
1.71308e+09	25.72	0	Non		0	1	1	25.72	25.77	0.05	20
1.71308e+09	25.77	1	Ring		1	1	0	25.77	25.8	0.03	0
1.71308e+09	25.8	1	Ring		1	0	-1	25.8	25.83	0.03	-33.3333
1.71308e+09	25.83	0	Non		0	1	1	25.83	25.86	0.03	33.3333
1.71308e+09	25.86	1	Ring		1	0	-1	25.86	25.89	0.03	-33.3333
1.71308e+09	25.89	0	Non		0	0	0	25.89	25.92	0.03	0
1.71308e+09	25.92	0	Non		0	1	1	25.92	25.96	0.04	25
1.71308e+09	25.96	1	Ring		1	0	-1	25.96	26	0.04	-25
1.71308e+09	26	0	Non		0	0	0	26	26.03	0.03	0
1.71308e+09	26.03	0	Non		0	0	0	26.03	26.06	0.03	0
1.71308e+09	26.06	0	Non		0	0	0	26.06	26.09	0.03	0
1.71308e+09	26.09	0	Non		0	0	0	26.09	26.13	0.04	0
1.71308e+09	26.13	0	Non		0	0	0	26.13	26.16	0.03	0
1.71308e+09	26.16	0	Non		0	0	0	26.16	26.19	0.03	0
1.71308e+09	26.19	0	Non		0	0	0	26.19	26.22	0.03	0
1.71308e+09	26.22	0	Non		0	0	0	26.22	26.27	0.05	0
1.71308e+09	26.27	0	Non		0	1	1	26.27	26.31	0.04	25
1.71308e+09	26.31	1	Ring		1	1	0	26.31	26.35	0.04	0
1.71308e+09	26.35	1	Ring		1	0	-1	26.35	26.39	0.04	-25
1.71308e+09	26.39	0	Non		0	0	0	26.39	26.42	0.03	0
1.71308e+09	26.42	0	Non		0	0	0	26.42	26.46	0.04	0
1.71308e+09	26.46	0	Non		0	0	0	26.46	26.5	0.04	0
1.71308e+09	26.5	0	Non		0	0	0	26.5	26.53	0.03	0
1.71308e+09	26.53	0	Non		0	0	0	26.53	26.58	0.05	0
1.71308e+09	26.58	0	Non		0	0	0	26.58	26.63	0.05	0
1.71308e+09	26.63	0	Non		0	0	0	26.63	26.67	0.04	0
1.71308e+09	26.67	0	Non		0	0	0	26.67	26.72	0.05	0
1.71308e+09	26.72	0	Non		0	0	0	26.72	26.75	0.03	0
1.71308e+09	26.75	0	Non		0	0	0	26.75	26.8	0.05	0
1.71308e+09	26.8	0	Non		0	0	0	26.8	26.84	0.04	0
1.71308e+09	26.84	0	Non		0	0	0	26.84	26.88	0.04	0
1.71308e+09	26.88	0	Non		0	0	0	26.88	26.92	0.04	0
1.71308e+09	26.92	0	Non		0	0	0	26.92	26.95	0.03	0
1.71308e+09	26.95	0	Non		0	0	0	26.95	26.99	0.04	0
1.71308e+09	26.99	0	Non		0	0	0	26.99	27.04	0.05	0
1.71308e+09	27.04	0	Non		0	0	0	27.04	27.09	0.05	0
1.71308e+09	27.09	0	Non		0	0	0	27.09	27.12	0.03	0
1.71308e+09	27.12	0	Non		0	0	0	27.12	27.15	0.03	0
1.71308e+09	27.15	0	Non		0	0	0	27.15	27.2	0.05	0
1.71308e+09	27.2	0	Non		0	0	0	27.2	27.24	0.04	0
1.71308e+09	27.24	0	Non		0	0	0	27.24	27.27	0.03	0
1.71308e+09	27.27	0	Non		0	0	0	27.27	27.31	0.04	0
1.71308e+09	27.31	0	Non		0	0	0	27.31	27.35	0.04	0
1.71308e+09	27.35	0	Non		0	0	0	27.35	27.38	0.03	0
1.71308e+09	27.38	0	Non		0	0	0	27.38	27.43	0.05	0
1.71308e+09	27.43	0	Non		0	0	0	27.43	27.46	0.03	0
1.71308e+09	27.46	0	Non		0	0	0	27.46	27.51	0.05	0
1.71308e+09	27.51	0	Non		0	0	0	27.51	27.54	0.03	0
1.71308e+09	27.54	0	Non		0	0	0	27.54	27.58	0.04	0
1.71308e+09	27.58	0	Non		0	0	0	27.58	27.61	0.03	0
1.71308e+09	27.61	0	Non		0	0	0	27.61	27.65	0.04	0
1.71308e+09	27.65	0	Non		0	0	0	27.65	27.68	0.03	0
1.71308e+09	27.68	0	Non		0	0	0	27.68	27.72	0.04	0
1.71308e+09	27.72	0	Non		0	0	0	27.72	27.77	0.05	0
1.71308e+09	27.77	0	Non		0	0	0	27.77	27.8	0.03	0
1.71308e+09	27.8	0	Non		0	0	0	27.8	27.84	0.04	0
1.71308e+09	27.84	0	Non		0	0	0	27.84	27.87	0.03	0
1.71308e+09	27.87	0	Non		0	0	0	27.87	27.92	0.05	0
1.71308e+09	27.92	0	Non		0	0	0	27.92	27.96	0.04	0
1.71308e+09	27.96	0	Non		0	0	0	27.96	27.99	0.03	0
1.71308e+09	27.99	0	Non		0	0	0	27.99	28.04	0.05	0
1.71308e+09	28.04	0	Non		0	0	0	28.04	28.07	0.03	0
1.71308e+09	28.07	0	Non		0	0	0	28.07	28.1	0.03	0
1.71308e+09	28.1	0	Non		0	0	0	28.1	28.13	0.03	0
1.71308e+09	28.13	0	Non		0	0	0	28.13	28.18	0.05	0
1.71308e+09	28.18	0	Non		0	0	0	28.18	28.22	0.04	0
1.71308e+09	28.22	0	Non		0	0	0	28.22	28.25	0.03	0
1.71308e+09	28.25	0	Non		0	0	0	28.25	28.29	0.04	0
1.71308e+09	28.29	0	Non		0	0	0	28.29	28.34	0.05	0
1.71308e+09	28.34	0	Non		0	0	0	28.34	28.38	0.04	0
1.71308e+09	28.38	0	Non		0	0	0	28.38	28.41	0.03	0
1.71308e+09	28.41	0	Non		0	0	0	28.41	28.44	0.03	0
1.71308e+09	28.44	0	Non		0	0	0	28.44	28.47	0.03	0
1.71308e+09	28.47	0	Non		0	0	0	28.47	28.51	0.04	0
1.71308e+09	28.51	0	Non		0	0	0	28.51	28.55	0.04	0
1.71308e+09	28.55	0	Non		0	0	0	28.55	28.6	0.05	0
1.71308e+09	28.6	0	Non		0	0	0	28.6	28.64	0.04	0
1.71308e+09	28.64	0	Non		0	0	0	28.64	28.69	0.05	0
1.71308e+09	28.69	0	Non		0	0	0	28.69	28.74	0.05	0
1.71308e+09	28.74	0	Non		0	0	0	28.74	28.78	0.04	0
1.71308e+09	28.78	0	Non		0	0	0	28.78	28.82	0.04	0
1.71308e+09	28.82	0	Non		0	0	0	28.82	28.86	0.04	0
1.71308e+09	28.86	0	Non		0	0	0	28.86	28.89	0.03	0
1.71308e+09	28.89	0	Non		0	0	0	28.89	28.92	0.03	0
1.71308e+09	28.92	0	Non		0	0	0	28.92	28.96	0.04	0
1.71308e+09	28.96	0	Non		0	0	0	28.96	28.99	0.03	0
1.71308e+09	28.99	0	Non		0	0	0	28.99	29.02	0.03	0
1.71308e+09	29.02	0	Non		0	0	0	29.02	29.07	0.05	0
1.71308e+09	29.07	0	Non		0	0	0	29.07	29.11	0.04	0
1.71308e+09	29.11	0	Non		0	0	0	29.11	29.16	0.05	0
1.71308e+09	29.16	0	Non		0	0	0	29.16	29.19	0.03	0
1.71308e+09	29.19	0	Non		0	0	0	29.19	29.24	0.05	0
1.71308e+09	29.24	0	Non		0	0	0	29.24	29.27	0.03	0
1.71308e+09	29.27	0	Non		0	0	0	29.27	29.3	0.03	0
1.71308e+09	29.3	0	Non		0	0	0	29.3	29.33	0.03	0
1.71308e+09	29.33	0	Non		0	0	0	29.33	29.38	0.05	0
1.71308e+09	29.38	0	Non		0	0	0	29.38	29.42	0.04	0
1.71308e+09	29.42	0	Non		0	0	0	29.42	29.45	0.03	0
1.71308e+09	29.45	0	Non		0	0	0	29.45	29.49	0.04	0
1.71308e+09	29.49	0	Non		0	0	0	29.49	29.52	0.03	0
1.71308e+09	29.52	0	Non		0	0	0	29.52	29.57	0.05	0
1.71308e+09	29.57	0	Non		0	0	0	29.57	29.61	0.04	0
1.71308e+09	29.61	0	Non		0	0	0	29.61	29.65	0.04	0
1.71308e+09	29.65	0	Non		0	0	0	29.65	29.69	0.04	0
1.71308e+09	29.69	0	Non		0	0	0	29.69	29.72	0.03	0
1.71308e+09	29.72	0	Non		0	0	0	29.72	29.77	0.05	0
1.71308e+09	29.77	0	Non		0	0	0	29.77	29.8	0.03	0
1.71308e+09	29.8	0	Non		0	0	0	29.8	29.83	0.03	0
1.71308e+09	29.83	0	Non		0	0	0	29.83	29.88	0.05	0
1.71308e+09	29.88	0	Non		0	0	0	29.88	29.91	0.03	0
1.71308e+09	29.91	0	Non		0	0	0	29.91	29.94	0.03	0
1.71308e+09	29.94	0	Non		0	0	0	29.94	29.99	0.05	0
1.71308e+09	29.99	0	Non		0	0	0	29.99	30.03	0.04	0
1.71308e+09	30.03	0	Non		0	0	0	30.03	30.06	0.03	0
1.71308e+09	30.06	0	Non		0	0	0	30.06	30.1	0.04	0
1.71308e+09	30.1	0	Non		0	0	0	30.1	30.13	0.03	0
1.71308e+09	30.13	0	Non		0	0	0	30.13	30.16	0.03	0
1.71308e+09	30.16	0	Non		0	0	0	30.16	30.2	0.04	0
1.71308e+09	30.2	0	Non		0	0	0	30.2	30.24	0.04	0
1.71308e+09	30.24	0	Non		0	0	0	30.24	30.28	0.04	0
1.71308e+09	30.28	0	Non		0	0	0	30.28	30.33	0.05	0
1.71308e+09	30.33	0	Non		0	0	0	30.33	30.38	0.05	0
1.71308e+09	30.38	0	Non		0	0	0	30.38	30.41	0.03	0
1.71308e+09	30.41	0	Non		0	0	0	30.41	30.46	0.05	0
1.71308e+09	30.46	0	Non		0	0	0	30.46	30.5	0.04	0
1.71308e+09	30.5	0	Non		0	0	0	30.5	30.53	0.03	0
1.71308e+09	30.53	0	Non		0	0	0	30.53	30.58	0.05	0
1.71308e+09	30.58	0	Non		0	0	0	30.58	30.61	0.03	0
1.71308e+09	30.61	0	Non		0	0	0	30.61	30.66	0.05	0
1.71308e+09	30.66	0	Non		0	0	0	30.66	30.69	0.03	0
1.71308e+09	30.69	0	Non		0	0	0	30.69	30.73	0.04	0
1.71308e+09	30.73	0	Non		0	0	0	30.73	30.77	0.04	0
1.71308e+09	30.77	0	Non		0	0	0	30.77	30.81	0.04	0
1.71308e+09	30.81	0	Non		0	0	0	30.81	30.86	0.05	0
1.71308e+09	30.86	0	Non		0	0	0	30.86	30.91	0.05	0
1.71308e+09	30.91	0	Non		0	0	0	30.91	30.95	0.04	0
1.71308e+09	30.95	0	Non		0	0	0	30.95	30.99	0.04	0
1.71308e+09	30.99	0	Non		0	0	0	30.99	31.03	0.04	0
1.71308e+09	31.03	0	Non		0	0	0	31.03	31.08	0.05	0
1.71308e+09	31.08	0	Non		0	0	0	31.08	31.11	0.03	0
1.71308e+09	31.11	0	Non		0	0	0	31.11	31.15	0.04	0
1.71308e+09	31.15	0	Non		0	0	0	31.15	31.2	0.05	0
1.71308e+09	31.2	0	Non		0	0	0	31.2	31.25	0.05	0
1.71308e+09	31.25	0	Non		0	0	0	31.25	31.28	0.03	0
1.71308e+09	31.28	0	Non		0	0	0	31.28	31.31	0.03	0
1.71308e+09	31.31	0	Non		0	0	0	31.31	31.34	0.03	0
1.71308e+09	31.34	0	Non		0	0	0	31.34	31.39	0.05	0
1.71308e+09	31.39	0	Non		0	0	0	31.39	31.44	0.05	0
1.71308e+09	31.44	0	Non		0	0	0	31.44	31.5	0.06	0
1.71308e+09	31.5	0	Non		0	0	0	31.5	31.54	0.04	0
1.71308e+09	31.54	0	Non		0	1	1	31.54	31.57	0.03	33.3333
1.71308e+09	31.57	1	Ring		1	1	0	31.57	31.61	0.04	0
1.71308e+09	31.61	1	Ring		1	0	-1	31.61	31.66	0.05	-20
1.71308e+09	31.66	0	Non		0	0	0	31.66	31.7	0.04	0
1.71308e+09	31.7	0	Non		0	0	0	31.7	31.75	0.05	0
1.71308e+09	31.75	0	Non		0	0	0	31.75	31.8	0.05	0
1.71308e+09	31.8	0	Non		0	0	0	31.8	31.84	0.04	0
1.71308e+09	31.84	0	Non		0	0	0	31.84	31.9	0.06	0
1.71308e+09	31.9	0	Non		0	0	0	31.9	31.94	0.04	0
1.71308e+09	31.94	0	Non		0	1	1	31.94	31.98	0.04	25
1.71308e+09	31.98	1	Ring		1	0	-1	31.98	32.01	0.03	-33.3333
1.71308e+09	32.01	0	Non		0	0	0	32.01	32.06	0.05	0
1.71308e+09	32.06	0	Non		0	0	0	32.06	32.1	0.04	0
1.71308e+09	32.1	0	Non		0	0	0	32.1	32.15	0.05	0
1.71308e+09	32.15	0	Non		0	0	0	32.15	32.18	0.03	0
1.71308e+09	32.18	0	Non		0	0	0	32.18	32.23	0.05	0
1.71308e+09	32.23	0	Non		0	1	1	32.23	32.3	0.07	14.2857
1.71308e+09	32.3	1	Ring		1	1	0	32.3	32.34	0.04	0
1.71308e+09	32.34	1	Ring		1	1	0	32.34	32.37	0.03	0
1.71308e+09	32.37	1	Ring		1	1	0	32.37	32.4	0.03	0
1.71308e+09	32.4	1	Ring		1	1	0	32.4	32.43	0.03	0
1.71308e+09	32.43	1	Ring		1	1	0	32.43	32.46	0.03	0
1.71308e+09	32.46	1	Ring		1	1	0	32.46	32.5	0.04	0
1.71308e+09	32.5	1	Ring		1	0	-1	32.5	32.53	0.03	-33.3333
1.71308e+09	32.53	0	Non		0	1	1	32.53	32.56	0.03	33.3333
1.71308e+09	32.56	1	Ring		1	1	0	32.56	32.59	0.03	0
1.71308e+09	32.59	1	Ring		1	1	0	32.59	32.64	0.05	0
1.71308e+09	32.64	1	Ring		1	1	0	32.64	32.68	0.04	0
1.71308e+09	32.68	1	Ring		1	1	0	32.68	32.73	0.05	0
1.71308e+09	32.73	1	Ring		1	1	0	32.73	32.76	0.03	0
1.71308e+09	32.76	1	Ring		1	0	-1	32.76	32.8	0.04	-25
1.71308e+09	32.8	0	Non		0	1	1	32.8	32.84	0.04	25
1.71308e+09	32.84	1	Ring		1	0	-1	32.84	32.87	0.03	-33.3333
1.71308e+09	32.87	0	Non		0	0	0	32.87	32.92	0.05	0
1.71308e+09	32.92	0	Non		0	0	0	32.92	32.96	0.04	0
1.71308e+09	32.96	0	Non		0	0	0	32.96	33.01	0.05	0
1.71308e+09	33.01	0	Non		0	0	0	33.01	33.04	0.03	0
1.71308e+09	33.04	0	Non		0	0	0	33.04	33.07	0.03	0
1.71308e+09	33.07	0	Non		0	0	0	33.07	33.12	0.05	0
1.71308e+09	33.12	0	Non		0	0	0	33.12	33.15	0.03	0
1.71308e+09	33.15	0	Non		0	0	0	33.15	33.2	0.05	0
1.71308e+09	33.2	0	Non		0	0	0	33.2	33.24	0.04	0
1.71308e+09	33.24	0	Non		0	0	0	33.24	33.27	0.03	0
1.71308e+09	33.27	0	Non		0	0	0	33.27	33.31	0.04	0
1.71308e+09	33.31	0	Non		0	0	0	33.31	33.35	0.04	0
1.71308e+09	33.35	0	Non		0	0	0	33.35	33.38	0.03	0
1.71308e+09	33.38	0	Non		0	0	0	33.38	33.43	0.05	0
1.71308e+09	33.43	0	Non		0	0	0	33.43	33.46	0.03	0
1.71308e+09	33.46	0	Non		0	0	0	33.46	33.51	0.05	0
1.71308e+09	33.51	0	Non		0	0	0	33.51	33.55	0.04	0
1.71308e+09	33.55	0	Non		0	0	0	33.55	33.59	0.04	0
1.71308e+09	33.59	0	Non		0	0	0	33.59	33.63	0.04	0
1.71308e+09	33.63	0	Non		0	0	0	33.63	33.68	0.05	0
1.71308e+09	33.68	0	Non		0	0	0	33.68	33.71	0.03	0
1.71308e+09	33.71	0	Non		0	0	0	33.71	33.76	0.05	0
1.71308e+09	33.76	0	Non		0	0	0	33.76	33.8	0.04	0
1.71308e+09	33.8	0	Non		0	0	0	33.8	33.83	0.03	0
1.71308e+09	33.83	0	Non		0	0	0	33.83	33.88	0.05	0
1.71308e+09	33.88	0	Non		0	0	0	33.88	33.92	0.04	0
1.71308e+09	33.92	0	Non		0	1	1	33.92	33.95	0.03	33.3333
1.71308e+09	33.95	1	Ring		1	1	0	33.95	33.98	0.03	0
1.71308e+09	33.98	1	Ring		1	1	0	33.98	34.02	0.04	0
1.71308e+09	34.02	1	Ring		1	1	0	34.02	34.05	0.03	0
1.71308e+09	34.05	1	Ring		1	1	0	34.05	34.08	0.03	0
1.71308e+09	34.08	1	Ring		1	0	-1	34.08	34.12	0.04	-25
1.71308e+09	34.12	0	Non		0	1	1	34.12	34.16	0.04	25
1.71308e+09	34.16	1	Ring		1	0	-1	34.16	34.19	0.03	-33.3333
1.71308e+09	34.19	0	Non		0	0	0	34.19	34.23	0.04	0
1.71308e+09	34.23	0	Non		0	0	0	34.23	34.28	0.05	0
1.71308e+09	34.28	0	Non		0	1	1	34.28	34.31	0.03	33.3333
1.71308e+09	34.31	1	Ring		1	0	-1	34.31	34.35	0.04	-25
1.71308e+09	34.35	0	Non		0	0	0	34.35	34.39	0.04	0
1.71308e+09	34.39	0	Non		0	1	1	34.39	34.44	0.05	20
1.71308e+09	34.44	1	Ring		1	1	0	34.44	34.48	0.04	0
1.71308e+09	34.48	1	Ring		1	1	0	34.48	34.51	0.03	0
1.71308e+09	34.51	1	Ring		1	0	-1	34.51	34.56	0.05	-20
1.71308e+09	34.56	0	Non		0	0	0	34.56	34.59	0.03	0
1.71308e+09	34.59	0	Non		0	0	0	34.59	34.64	0.05	0
1.71308e+09	34.64	0	Non		0	0	0	34.64	34.69	0.05	0
1.71308e+09	34.69	0	Non		0	0	0	34.69	34.73	0.04	0
1.71308e+09	34.73	0	Non		0	1	1	34.73	34.78	0.05	20
1.71308e+09	34.78	1	Ring		1	0	-1	34.78	34.83	0.05	-20
1.71308e+09	34.83	0	Non		0	0	0	34.83	34.86	0.03	0
1.71308e+09	34.86	0	Non		0	1	1	34.86	34.9	0.04	25
1.71308e+09	34.9	1	Ring		1	1	0	34.9	34.94	0.04	0
1.71308e+09	34.94	1	Ring		1	0	-1	34.94	34.98	0.04	-25
1.71308e+09	34.98	0	Non		0	0	0	34.98	35.01	0.03	0
1.71308e+09	35.01	0	Non		0	1	1	35.01	35.05	0.04	25
1.71308e+09	35.05	1	Ring		1	0	-1	35.05	35.08	0.03	-33.3333
1.71308e+09	35.08	0	Non		0	0	0	35.08	35.12	0.04	0
1.71308e+09	35.12	0	Non		0	0	0	35.12	35.17	0.05	0
1.71308e+09	35.17	0	Non		0	0	0	35.17	35.2	0.03	0
1.71308e+09	35.2	0	Non		0	0	0	35.2	35.23	0.03	0
1.71308e+09	35.23	0	Non		0	0	0	35.23	35.27	0.04	0
1.71308e+09	35.27	0	Non		0	0	0	35.27	35.31	0.04	0
1.71308e+09	35.31	0	Non		0	0	0	35.31	35.34	0.03	0
1.71308e+09	35.34	0	Non		0	0	0	35.34	35.38	0.04	0
1.71308e+09	35.38	0	Non		0	0	0	35.38	35.42	0.04	0
1.71308e+09	35.42	0	Non		0	0	0	35.42	35.47	0.05	0
1.71308e+09	35.47	0	Non		0	0	0	35.47	35.51	0.04	0
1.71308e+09	35.51	0	Non		0	0	0	35.51	35.55	0.04	0
1.71308e+09	35.55	0	Non		0	0	0	35.55	35.59	0.04	0
1.71308e+09	35.59	0	Non		0	0	0	35.59	35.64	0.05	0
1.71308e+09	35.64	0	Non		0	1	1	35.64	35.69	0.05	20
1.71308e+09	35.69	1	Ring		1	1	0	35.69	35.72	0.03	0
1.71308e+09	35.72	1	Ring		1	1	0	35.72	35.77	0.05	0
1.71308e+09	35.77	1	Ring		1	1	0	35.77	35.81	0.04	0
1.71308e+09	35.81	1	Ring		1	1	0	35.81	35.84	0.03	0
1.71308e+09	35.84	1	Ring		1	1	0	35.84	35.89	0.05	0
1.71308e+09	35.89	1	Ring		1	1	0	35.89	35.94	0.05	0
1.71308e+09	35.94	1	Ring		1	1	0	35.94	35.98	0.04	0
1.71308e+09	35.98	1	Ring		1	1	0	35.98	36.01	0.03	0
1.71308e+09	36.01	1	Ring		1	1	0	36.01	36.04	0.03	0
1.71308e+09	36.04	1	Ring		1	1	0	36.04	36.08	0.04	0
1.71308e+09	36.08	1	Ring		1	1	0	36.08	36.12	0.04	0
1.71308e+09	36.12	1	Ring		1	1	0	36.12	36.15	0.03	0
1.71308e+09	36.15	1	Ring		1	1	0	36.15	36.18	0.03	0
1.71308e+09	36.18	1	Ring		1	1	0	36.18	36.21	0.03	0
1.71308e+09	36.21	1	Ring		1	1	0	36.21	36.25	0.04	0
1.71308e+09	36.25	1	Ring		1	1	0	36.25	36.28	0.03	0
1.71308e+09	36.28	1	Ring		1	1	0	36.28	36.31	0.03	0
1.71308e+09	36.31	1	Ring		1	1	0	36.31	36.34	0.03	0
1.71308e+09	36.34	1	Ring		1	1	0	36.34	36.37	0.03	0
1.71308e+09	36.37	1	Ring		1	1	0	36.37	36.4	0.03	0
1.71308e+09	36.4	1	Ring		1	1	0	36.4	36.43	0.03	0
1.71308e+09	36.43	1	Ring		1	1	0	36.43	36.46	0.03	0
1.71308e+09	36.46	1	Ring		1	0	-1	36.46	36.49	0.03	-33.3333
1.71308e+09	36.49	0	Non		0	0	0	36.49	36.53	0.04	0
1.71308e+09	36.53	0	Non		0	0	0	36.53	36.56	0.03	0
1.71308e+09	36.56	0	Non		0	0	0	36.56	36.59	0.03	0
1.71308e+09	36.59	0	Non		0	0	0	36.59	36.62	0.03	0
1.71308e+09	36.62	0	Non		0	1	1	36.62	36.65	0.03	33.3333
1.71308e+09	36.65	1	Ring		1	1	0	36.65	36.68	0.03	0
1.71308e+09	36.68	1	Ring		1	1	0	36.68	36.71	0.03	0
1.71308e+09	36.71	1	Ring		1	1	0	36.71	36.74	0.03	0
1.71308e+09	36.74	1	Ring		1	1	0	36.74	36.78	0.04	0
1.71308e+09	36.78	1	Ring		1	1	0	36.78	36.81	0.03	0
1.71308e+09	36.81	1	Ring		1	1	0	36.81	36.84	0.03	0
1.71308e+09	36.84	1	Ring		1	1	0	36.84	36.87	0.03	0
1.71308e+09	36.87	1	Ring		1	1	0	36.87	36.9	0.03	0
1.71308e+09	36.9	1	Ring		1	1	0	36.9	36.93	0.03	0
1.71308e+09	36.93	1	Ring		1	1	0	36.93	36.96	0.03	0
1.71308e+09	36.96	1	Ring		1	1	0	36.96	36.99	0.03	0
1.71308e+09	36.99	1	Ring		1	1	0	36.99	37.03	0.04	0
1.71308e+09	37.03	1	Ring		1	1	0	37.03	37.06	0.03	0
1.71308e+09	37.06	1	Ring		1	1	0	37.06	37.09	0.03	0
1.71308e+09	37.09	1	Ring		1	1	0	37.09	37.12	0.03	0
1.71308e+09	37.12	1	Ring		1	1	0	37.12	37.16	0.04	0
1.71308e+09	37.16	1	Ring		1	1	0	37.16	37.19	0.03	0
1.71308e+09	37.19	1	Ring		1	1	0	37.19	37.23	0.04	0
1.71308e+09	37.23	1	Ring		1	1	0	37.23	37.26	0.03	0
1.71308e+09	37.26	1	Ring		1	1	0	37.26	37.29	0.03	0
1.71308e+09	37.29	1	Ring		1	1	0	37.29	37.32	0.03	0
1.71308e+09	37.32	1	Ring		1	1	0	37.32	37.36	0.04	0
1.71308e+09	37.36	1	Ring		1	1	0	37.36	37.4	0.04	0
1.71308e+09	37.4	1	Ring		1	1	0	37.4	37.43	0.03	0
1.71308e+09	37.43	1	Ring		1	1	0	37.43	37.46	0.03	0
1.71308e+09	37.46	1	Ring		1	1	0	37.46	37.49	0.03	0
1.71308e+09	37.49	1	Ring		1	1	0	37.49	37.52	0.03	0
1.71308e+09	37.52	1	Ring		1	1	0	37.52	37.56	0.04	0
1.71308e+09	37.56	1	Ring		1	1	0	37.56	37.6	0.04	0
1.71308e+09	37.6	1	Ring		1	1	0	37.6	37.63	0.03	0
1.71308e+09	37.63	1	Ring		1	1	0	37.63	37.67	0.04	0
1.71308e+09	37.67	1	Ring		1	1	0	37.67	37.7	0.03	0
1.71308e+09	37.7	1	Ring		1	1	0	37.7	37.73	0.03	0
1.71308e+09	37.73	1	Ring		1	1	0	37.73	37.76	0.03	0
1.71308e+09	37.76	1	Ring		1	1	0	37.76	37.79	0.03	0
1.71308e+09	37.79	1	Ring		1	1	0	37.79	37.82	0.03	0
1.71308e+09	37.82	1	Ring		1	1	0	37.82	37.85	0.03	0
1.71308e+09	37.85	1	Ring		1	1	0	37.85	37.88	0.03	0
1.71308e+09	37.88	1	Ring		1	1	0	37.88	37.93	0.05	0
1.71308e+09	37.93	1	Ring		1	1	0	37.93	37.96	0.03	0
1.71308e+09	37.96	1	Ring		1	1	0	37.96	38	0.04	0
1.71308e+09	38	1	Ring		1	1	0	38	38.03	0.03	0
1.71308e+09	38.03	1	Ring		1	1	0	38.03	38.06	0.03	0
1.71308e+09	38.06	1	Ring		1	1	0	38.06	38.09	0.03	0
1.71308e+09	38.09	1	Ring		1	1	0	38.09	38.12	0.03	0
1.71308e+09	38.12	1	Ring		1	1	0	38.12	38.15	0.03	0
1.71308e+09	38.15	1	Ring		1	1	0	38.15	38.18	0.03	0
1.71308e+09	38.18	1	Ring		1	1	0	38.18	38.22	0.04	0
1.71308e+09	38.22	1	Ring		1	1	0	38.22	38.25	0.03	0
1.71308e+09	38.25	1	Ring		1	1	0	38.25	38.28	0.03	0
1.71308e+09	38.28	1	Ring		1	1	0	38.28	38.33	0.05	0
1.71308e+09	38.33	1	Ring		1	1	0	38.33	38.37	0.04	0
1.71308e+09	38.37	1	Ring		1	1	0	38.37	38.4	0.03	0
1.71308e+09	38.4	1	Ring		1	1	0	38.4	38.43	0.03	0
1.71308e+09	38.43	1	Ring		1	1	0	38.43	38.46	0.03	0
1.71308e+09	38.46	1	Ring		1	1	0	38.46	38.5	0.04	0
1.71308e+09	38.5	1	Ring		1	1	0	38.5	38.53	0.03	0
1.71308e+09	38.53	1	Ring		1	1	0	38.53	38.56	0.03	0
1.71308e+09	38.56	1	Ring		1	1	0	38.56	38.59	0.03	0
1.71308e+09	38.59	1	Ring		1	1	0	38.59	38.62	0.03	0
1.71308e+09	38.62	1	Ring		1	1	0	38.62	38.65	0.03	0
1.71308e+09	38.65	1	Ring		1	1	0	38.65	38.68	0.03	0
1.71308e+09	38.68	1	Ring		1	1	0	38.68	38.73	0.05	0
1.71308e+09	38.73	1	Ring		1	1	0	38.73	38.76	0.03	0
1.71308e+09	38.76	1	Ring		1	1	0	38.76	38.81	0.05	0
1.71308e+09	38.81	1	Ring		1	1	0	38.81	38.84	0.03	0
1.71308e+09	38.84	1	Ring		1	1	0	38.84	38.87	0.03	0
1.71308e+09	38.87	1	Ring		1	1	0	38.87	38.9	0.03	0
1.71308e+09	38.9	1	Ring		1	1	0	38.9	38.93	0.03	0
1.71308e+09	38.93	1	Ring		1	1	0	38.93	38.96	0.03	0
1.71308e+09	38.96	1	Ring		1	1	0	38.96	38.99	0.03	0
1.71308e+09	38.99	1	Ring		1	1	0	38.99	39.02	0.03	0
1.71308e+09	39.02	1	Ring		1	1	0	39.02	39.05	0.03	0
1.71308e+09	39.05	1	Ring		1	1	0	39.05	39.08	0.03	0
1.71308e+09	39.08	1	Ring		1	1	0	39.08	39.13	0.05	0
1.71308e+09	39.13	1	Ring		1	1	0	39.13	39.16	0.03	0
1.71308e+09	39.16	1	Ring		1	1	0	39.16	39.2	0.04	0
1.71308e+09	39.2	1	Ring		1	1	0	39.2	39.23	0.03	0
1.71308e+09	39.23	1	Ring		1	1	0	39.23	39.26	0.03	0
1.71308e+09	39.26	1	Ring		1	1	0	39.26	39.29	0.03	0
1.71308e+09	39.29	1	Ring		1	1	0	39.29	39.32	0.03	0
1.71308e+09	39.32	1	Ring		1	1	0	39.32	39.35	0.03	0
1.71308e+09	39.35	1	Ring		1	1	0	39.35	39.38	0.03	0
1.71308e+09	39.38	1	Ring		1	1	0	39.38	39.41	0.03	0
1.71308e+09	39.41	1	Ring		1	1	0	39.41	39.45	0.04	0
1.71308e+09	39.45	1	Ring		1	1	0	39.45	39.49	0.04	0
1.71308e+09	39.49	1	Ring		1	1	0	39.49	39.53	0.04	0
1.71308e+09	39.53	1	Ring		1	1	0	39.53	39.57	0.04	0
1.71308e+09	39.57	1	Ring		1	1	0	39.57	39.6	0.03	0
1.71308e+09	39.6	1	Ring		1	1	0	39.6	39.63	0.03	0
1.71308e+09	39.63	1	Ring		1	1	0	39.63	39.66	0.03	0
1.71308e+09	39.66	1	Ring		1	1	0	39.66	39.7	0.04	0
1.71308e+09	39.7	1	Ring		1	1	0	39.7	39.73	0.03	0
1.71308e+09	39.73	1	Ring		1	1	0	39.73	39.76	0.03	0
1.71308e+09	39.76	1	Ring		1	1	0	39.76	39.79	0.03	0
1.71308e+09	39.79	1	Ring		1	1	0	39.79	39.82	0.03	0
1.71308e+09	39.82	1	Ring		1	1	0	39.82	39.85	0.03	0
1.71308e+09	39.85	1	Ring		1	1	0	39.85	39.88	0.03	0
1.71308e+09	39.88	1	Ring		1	1	0	39.88	39.93	0.05	0
1.71308e+09	39.93	1	Ring		1	1	0	39.93	39.98	0.05	0
1.71308e+09	39.98	1	Ring		1	1	0	39.98	40.01	0.03	0
1.71308e+09	40.01	1	Ring		1	1	0	40.01	40.04	0.03	0
1.71308e+09	40.04	1	Ring		1	1	0	40.04	40.07	0.03	0
1.71308e+09	40.07	1	Ring		1	1	0	40.07	40.1	0.03	0
1.71308e+09	40.1	1	Ring		1	1	0	40.1	40.13	0.03	0
1.71308e+09	40.13	1	Ring		1	1	0	40.13	40.16	0.03	0
1.71308e+09	40.16	1	Ring		1	1	0	40.16	40.19	0.03	0
1.71308e+09	40.19	1	Ring		1	1	0	40.19	40.22	0.03	0
1.71308e+09	40.22	1	Ring		1	1	0	40.22	40.25	0.03	0
1.71308e+09	40.25	1	Ring		1	1	0	40.25	40.3	0.05	0
1.71308e+09	40.3	1	Ring		1	1	0	40.3	40.33	0.03	0
1.71308e+09	40.33	1	Ring		1	1	0	40.33	40.36	0.03	0
1.71308e+09	40.36	1	Ring		1	1	0	40.36	40.39	0.03	0
1.71308e+09	40.39	1	Ring		1	1	0	40.39	40.43	0.04	0
1.71308e+09	40.43	1	Ring		1	1	0	40.43	40.46	0.03	0
1.71308e+09	40.46	1	Ring		1	1	0	40.46	40.49	0.03	0
1.71308e+09	40.49	1	Ring		1	1	0	40.49	40.53	0.04	0
1.71308e+09	40.53	1	Ring		1	1	0	40.53	40.57	0.04	0
1.71308e+09	40.57	1	Ring		1	1	0	40.57	40.6	0.03	0
1.71308e+09	40.6	1	Ring		1	1	0	40.6	40.63	0.03	0
1.71308e+09	40.63	1	Ring		1	1	0	40.63	40.66	0.03	0
1.71308e+09	40.66	1	Ring		1	1	0	40.66	40.7	0.04	0
1.71308e+09	40.7	1	Ring		1	1	0	40.7	40.74	0.04	0
1.71308e+09	40.74	1	Ring		1	1	0	40.74	40.77	0.03	0
1.71308e+09	40.77	1	Ring		1	1	0	40.77	40.8	0.03	0
1.71308e+09	40.8	1	Ring		1	1	0	40.8	40.83	0.03	0
1.71308e+09	40.83	1	Ring		1	1	0	40.83	40.86	0.03	0
1.71308e+09	40.86	1	Ring		1	1	0	40.86	40.89	0.03	0
1.71308e+09	40.89	1	Ring		1	1	0	40.89	40.92	0.03	0
1.71308e+09	40.92	1	Ring		1	1	0	40.92	40.96	0.04	0
1.71308e+09	40.96	1	Ring		1	1	0	40.96	40.99	0.03	0
1.71308e+09	40.99	1	Ring		1	1	0	40.99	41.02	0.03	0
1.71308e+09	41.02	1	Ring		1	1	0	41.02	41.05	0.03	0
1.71308e+09	41.05	1	Ring		1	1	0	41.05	41.1	0.05	0
1.71308e+09	41.1	1	Ring		1	1	0	41.1	41.13	0.03	0
1.71308e+09	41.13	1	Ring		1	1	0	41.13	41.16	0.03	0
1.71308e+09	41.16	1	Ring		1	1	0	41.16	41.19	0.03	0
1.71308e+09	41.19	1	Ring		1	1	0	41.19	41.22	0.03	0
1.71308e+09	41.22	1	Ring		1	1	0	41.22	41.26	0.04	0
1.71308e+09	41.26	1	Ring		1	1	0	41.26	41.3	0.04	0
1.71308e+09	41.3	1	Ring		1	1	0	41.3	41.33	0.03	0
1.71308e+09	41.33	1	Ring		1	1	0	41.33	41.36	0.03	0
1.71308e+09	41.36	1	Ring		1	1	0	41.36	41.39	0.03	0
1.71308e+09	41.39	1	Ring		1	1	0	41.39	41.42	0.03	0
1.71308e+09	41.42	1	Ring		1	1	0	41.42	41.45	0.03	0
1.71308e+09	41.45	1	Ring		1	1	0	41.45	41.5	0.05	0
1.71308e+09	41.5	1	Ring		1	1	0	41.5	41.53	0.03	0
1.71308e+09	41.53	1	Ring		1	1	0	41.53	41.56	0.03	0
1.71308e+09	41.56	1	Ring		1	1	0	41.56	41.59	0.03	0
1.71308e+09	41.59	1	Ring		1	1	0	41.59	41.62	0.03	0
1.71308e+09	41.62	1	Ring		1	0	-1	41.62	45.94	4.32	-0.231481
1.71308e+09	45.94	0	Non		0	0	0	45.94	45.97	0.03	0
1.71308e+09	45.97	0	Non		0	0	0	45.97	46	0.03	0
1.71308e+09	46	0	Non		0	0	0	46	46.05	0.05	0
1.71308e+09	46.05	0	Non		0	0	0	46.05	46.08	0.03	0
1.71308e+09	46.08	0	Non		0	0	0	46.08	46.11	0.03	0
1.71308e+09	46.11	0	Non		0	0	0	46.11	46.16	0.05	0
1.71308e+09	46.16	0	Non		0	0	0	46.16	46.19	0.03	0
1.71308e+09	46.19	0	Non		0	0	0	46.19	46.24	0.05	0
1.71308e+09	46.24	0	Non		0	0	0	46.24	46.27	0.03	0
1.71308e+09	46.27	0	Non		0	0	0	46.27	46.3	0.03	0
1.71308e+09	46.3	0	Non		0	0	0	46.3	46.33	0.03	0
1.71308e+09	46.33	0	Non		0	0	0	46.33	46.36	0.03	0
1.71308e+09	46.36	0	Non		0	0	0	46.36	46.4	0.04	0
1.71308e+09	46.4	0	Non		0	0	0	46.4	46.44	0.04	0
1.71308e+09	46.44	0	Non		0	0	0	46.44	46.47	0.03	0
1.71308e+09	46.47	0	Non		0	0	0	46.47	46.5	0.03	0
1.71308e+09	46.5	0	Non		0	0	0	46.5	46.53	0.03	0
1.71308e+09	46.53	0	Non		0	0	0	46.53	46.56	0.03	0
1.71308e+09	46.56	0	Non		0	0	0	46.56	46.59	0.03	0
1.71308e+09	46.59	0	Non		0	0	0	46.59	46.63	0.04	0
1.71308e+09	46.63	0	Non		0	0	0	46.63	46.67	0.04	0
1.71308e+09	46.67	0	Non		0	0	0	46.67	46.7	0.03	0
1.71308e+09	46.7	0	Non		0	0	0	46.7	46.73	0.03	0
1.71308e+09	46.73	0	Non		0	0	0	46.73	46.77	0.04	0
1.71308e+09	46.77	0	Non		0	0	0	46.77	46.8	0.03	0
1.71308e+09	46.8	0	Non		0	0	0	46.8	46.84	0.04	0
1.71308e+09	46.84	0	Non		0	0	0	46.84	46.89	0.05	0
1.71308e+09	46.89	0	Non		0	0	0	46.89	46.92	0.03	0
1.71308e+09	46.92	0	Non		0	0	0	46.92	46.97	0.05	0
1.71308e+09	46.97	0	Non		0	0	0	46.97	47.01	0.04	0
1.71308e+09	47.01	0	Non		0	0	0	47.01	47.04	0.03	0
1.71308e+09	47.04	0	Non		0	0	0	47.04	47.08	0.04	0
1.71308e+09	47.08	0	Non		0	0	0	47.08	47.11	0.03	0
1.71308e+09	47.11	0	Non		0	0	0	47.11	47.14	0.03	0
1.71308e+09	47.14	0	Non		0	0	0	47.14	47.19	0.05	0
1.71308e+09	47.19	0	Non		0	0	0	47.19	47.22	0.03	0
1.71308e+09	47.22	0	Non		0	0	0	47.22	47.25	0.03	0
1.71308e+09	47.25	0	Non		0	0	0	47.25	47.28	0.03	0
1.71308e+09	47.28	0	Non		0	0	0	47.28	47.31	0.03	0
1.71308e+09	47.31	0	Non		0	0	0	47.31	47.36	0.05	0
1.71308e+09	47.36	0	Non		0	0	0	47.36	47.4	0.04	0
1.71308e+09	47.4	0	Non		0	0	0	47.4	47.44	0.04	0
1.71308e+09	47.44	0	Non		0	0	0	47.44	47.48	0.04	0
1.71308e+09	47.48	0	Non		0	0	0	47.48	47.53	0.05	0
1.71308e+09	47.53	0	Non		0	1	1	47.53	47.57	0.04	25
1.71308e+09	47.57	1	Ring		1	0	-1	47.57	47.61	0.04	-25
1.71308e+09	47.61	0	Non		0	0	0	47.61	47.65	0.04	0
1.71308e+09	47.65	0	Non		0	0	0	47.65	47.68	0.03	0
1.71308e+09	47.68	0	Non		0	0	0	47.68	47.72	0.04	0
1.71308e+09	47.72	0	Non		0	0	0	47.72	47.76	0.04	0
1.71308e+09	47.76	0	Non		0	0	0	47.76	47.79	0.03	0
1.71308e+09	47.79	0	Non		0	0	0	47.79	47.82	0.03	0
1.71308e+09	47.82	0	Non		0	0	0	47.82	47.85	0.03	0
1.71308e+09	47.85	0	Non		0	0	0	47.85	47.9	0.05	0
1.71308e+09	47.9	0	Non		0	0	0	47.9	47.93	0.03	0
1.71308e+09	47.93	0	Non		0	0	0	47.93	47.96	0.03	0
1.71308e+09	47.96	0	Non		0	0	0	47.96	47.99	0.03	0
1.71308e+09	47.99	0	Non		0	0	0	47.99	48.04	0.05	0
1.71308e+09	48.04	0	Non		0	0	0	48.04	48.07	0.03	0
1.71308e+09	48.07	0	Non		0	0	0	48.07	48.1	0.03	0
1.71308e+09	48.1	0	Non		0	0	0	48.1	48.13	0.03	0
1.71308e+09	48.13	0	Non		0	0	0	48.13	48.17	0.04	0
1.71308e+09	48.17	0	Non		0	0	0	48.17	48.2	0.03	0
1.71308e+09	48.2	0	Non		0	0	0	48.2	48.23	0.03	0
1.71308e+09	48.23	0	Non		0	0	0	48.23	48.26	0.03	0
1.71308e+09	48.26	0	Non		0	0	0	48.26	48.29	0.03	0
1.71308e+09	48.29	0	Non		0	0	0	48.29	48.33	0.04	0
1.71308e+09	48.33	0	Non		0	0	0	48.33	48.37	0.04	0
1.71308e+09	48.37	0	Non		0	0	0	48.37	48.4	0.03	0
1.71308e+09	48.4	0	Non		0	0	0	48.4	48.44	0.04	0
1.71308e+09	48.44	0	Non		0	0	0	48.44	48.48	0.04	0
1.71308e+09	48.48	0	Non		0	0	0	48.48	48.53	0.05	0
1.71308e+09	48.53	0	Non		0	0	0	48.53	48.56	0.03	0
1.71308e+09	48.56	0	Non		0	0	0	48.56	48.61	0.05	0
1.71308e+09	48.61	0	Non		0	0	0	48.61	48.65	0.04	0
1.71308e+09	48.65	0	Non		0	0	0	48.65	48.7	0.05	0
1.71308e+09	48.7	0	Non		0	0	0	48.7	48.73	0.03	0
1.71308e+09	48.73	0	Non		0	0	0	48.73	48.78	0.05	0
1.71308e+09	48.78	0	Non		0	0	0	48.78	48.81	0.03	0
1.71308e+09	48.81	0	Non		0	0	0	48.81	48.86	0.05	0
1.71308e+09	48.86	0	Non		0	0	0	48.86	48.9	0.04	0
1.71308e+09	48.9	0	Non		0	1	1	48.9	48.93	0.03	33.3333
1.71308e+09	48.93	1	Ring		1	0	-1	48.93	48.97	0.04	-25
1.71308e+09	48.97	0	Non		0	0	0	48.97	49	0.03	0
1.71308e+09	49	0	Non		0	0	0	49	49.04	0.04	0
1.71308e+09	49.04	0	Non		0	0	0	49.04	49.08	0.04	0
1.71308e+09	49.08	0	Non		0	0	0	49.08	49.12	0.04	0
1.71308e+09	49.12	0	Non		0	0	0	49.12	49.15	0.03	0
1.71308e+09	49.15	0	Non		0	0	0	49.15	49.19	0.04	0
1.71308e+09	49.19	0	Non		0	0	0	49.19	49.23	0.04	0
1.71308e+09	49.23	0	Non		0	0	0	49.23	49.28	0.05	0
1.71308e+09	49.28	0	Non		0	0	0	49.28	49.32	0.04	0
1.71308e+09	49.32	0	Non		0	0	0	49.32	49.37	0.05	0
1.71308e+09	49.37	0	Non		0	0	0	49.37	49.4	0.03	0
1.71308e+09	49.4	0	Non		0	0	0	49.4	49.45	0.05	0
1.71308e+09	49.45	0	Non		0	0	0	49.45	49.5	0.05	0
1.71308e+09	49.5	0	Non		0	0	0	49.5	49.54	0.04	0
1.71308e+09	49.54	0	Non		0	0	0	49.54	49.57	0.03	0
1.71308e+09	49.57	0	Non		0	0	0	49.57	49.62	0.05	0
1.71308e+09	49.62	0	Non		0	0	0	49.62	49.66	0.04	0
1.71308e+09	49.66	0	Non		0	0	0	49.66	49.7	0.04	0
1.71308e+09	49.7	0	Non		0	0	0	49.7	49.73	0.03	0
1.71308e+09	49.73	0	Non		0	0	0	49.73	49.77	0.04	0
1.71308e+09	49.77	0	Non		0	0	0	49.77	49.81	0.04	0
1.71308e+09	49.81	0	Non		0	0	0	49.81	49.85	0.04	0
1.71308e+09	49.85	0	Non		0	0	0	49.85	49.9	0.05	0
1.71308e+09	49.9	0	Non		0	0	0	49.9	49.95	0.05	0
1.71308e+09	49.95	0	Non		0	0	0	49.95	49.98	0.03	0
1.71308e+09	49.98	0	Non		0	0	0	49.98	50.02	0.04	0
1.71308e+09	50.02	0	Non		0	0	0	50.02	50.06	0.04	0
1.71308e+09	50.06	0	Non		0	0	0	50.06	50.09	0.03	0
1.71308e+09	50.09	0	Non		0	0	0	50.09	50.13	0.04	0
1.71308e+09	50.13	0	Non		0	0	0	50.13	50.18	0.05	0
1.71308e+09	50.18	0	Non		0	0	0	50.18	50.21	0.03	0
1.71308e+09	50.21	0	Non		0	0	0	50.21	50.24	0.03	0
1.71308e+09	50.24	0	Non		0	0	0	50.24	50.27	0.03	0
1.71308e+09	50.27	0	Non		0	0	0	50.27	50.3	0.03	0
1.71308e+09	50.3	0	Non		0	0	0	50.3	50.34	0.04	0
1.71308e+09	50.34	0	Non		0	0	0	50.34	50.37	0.03	0
1.71308e+09	50.37	0	Non		0	1	1	50.37	50.4	0.03	33.3333
1.71308e+09	50.4	1	Ring		1	1	0	50.4	50.43	0.03	0
1.71308e+09	50.43	1	Ring		1	1	0	50.43	50.46	0.03	0
1.71308e+09	50.46	1	Ring		1	1	0	50.46	50.49	0.03	0
1.71308e+09	50.49	1	Ring		1	1	0	50.49	50.52	0.03	0
1.71308e+09	50.52	1	Ring		1	1	0	50.52	50.55	0.03	0
1.71308e+09	50.55	1	Ring		1	1	0	50.55	50.58	0.03	0
1.71308e+09	50.58	1	Ring		1	1	0	50.58	50.61	0.03	0
1.71308e+09	50.61	1	Ring		1	1	0	50.61	50.65	0.04	0
1.71308e+09	50.65	1	Ring		1	1	0	50.65	50.68	0.03	0
1.71308e+09	50.68	1	Ring		1	1	0	50.68	50.71	0.03	0
1.71308e+09	50.71	1	Ring		1	1	0	50.71	50.74	0.03	0
1.71308e+09	50.74	1	Ring		1	1	0	50.74	50.77	0.03	0
1.71308e+09	50.77	1	Ring		1	1	0	50.77	50.8	0.03	0
1.71308e+09	50.8	1	Ring		1	1	0	50.8	50.83	0.03	0
1.71308e+09	50.83	1	Ring		1	1	0	50.83	50.86	0.03	0
1.71308e+09	50.86	1	Ring		1	1	0	50.86	50.89	0.03	0
1.71308e+09	50.89	1	Ring		1	1	0	50.89	50.93	0.04	0
1.71308e+09	50.93	1	Ring		1	1	0	50.93	50.96	0.03	0
1.71308e+09	50.96	1	Ring		1	1	0	50.96	50.99	0.03	0
1.71308e+09	50.99	1	Ring		1	0	-1	50.99	51.02	0.03	-33.3333
1.71308e+09	51.02	0	Non		0	1	1	51.02	51.05	0.03	33.3333
1.71308e+09	51.05	1	Ring		1	1	0	51.05	51.1	0.05	0
1.71308e+09	51.1	1	Ring		1	1	0	51.1	51.13	0.03	0
1.71308e+09	51.13	1	Ring		1	1	0	51.13	51.17	0.04	0
1.71308e+09	51.17	1	Ring		1	1	0	51.17	51.2	0.03	0
1.71308e+09	51.2	1	Ring		1	1	0	51.2	51.23	0.03	0
1.71308e+09	51.23	1	Ring		1	1	0	51.23	51.27	0.04	0
1.71308e+09	51.27	1	Ring		1	1	0	51.27	51.3	0.03	0
1.71308e+09	51.3	1	Ring		1	1	0	51.3	51.33	0.03	0
1.71308e+09	51.33	1	Ring		1	1	0	51.33	51.36	0.03	0
1.71308e+09	51.36	1	Ring		1	1	0	51.36	51.39	0.03	0
1.71308e+09	51.39	1	Ring		1	1	0	51.39	51.42	0.03	0
1.71308e+09	51.42	1	Ring		1	1	0	51.42	51.45	0.03	0
1.71308e+09	51.45	1	Ring		1	1	0	51.45	51.48	0.03	0
1.71308e+09	51.48	1	Ring		1	1	0	51.48	51.53	0.05	0
1.71308e+09	51.53	1	Ring		1	1	0	51.53	51.56	0.03	0
1.71308e+09	51.56	1	Ring		1	1	0	51.56	51.6	0.04	0
1.71308e+09	51.6	1	Ring		1	1	0	51.6	51.63	0.03	0
1.71308e+09	51.63	1	Ring		1	1	0	51.63	51.67	0.04	0
1.71308e+09	51.67	1	Ring		1	1	0	51.67	51.7	0.03	0
1.71308e+09	51.7	1	Ring		1	1	0	51.7	51.73	0.03	0
1.71308e+09	51.73	1	Ring		1	1	0	51.73	51.77	0.04	0
1.71308e+09	51.77	1	Ring		1	1	0	51.77	51.8	0.03	0
1.71308e+09	51.8	1	Ring		1	1	0	51.8	51.83	0.03	0
1.71308e+09	51.83	1	Ring		1	1	0	51.83	51.86	0.03	0
1.71308e+09	51.86	1	Ring		1	1	0	51.86	51.9	0.04	0
1.71308e+09	51.9	1	Ring		1	1	0	51.9	51.93	0.03	0
1.71308e+09	51.93	1	Ring		1	1	0	51.93	51.97	0.04	0
1.71308e+09	51.97	1	Ring		1	1	0	51.97	52	0.03	0
1.71308e+09	52	1	Ring		1	1	0	52	52.03	0.03	0
1.71308e+09	52.03	1	Ring		1	1	0	52.03	52.06	0.03	0
1.71308e+09	52.06	1	Ring		1	1	0	52.06	52.11	0.05	0
1.71308e+09	52.11	1	Ring		1	1	0	52.11	52.14	0.03	0
1.71308e+09	52.14	1	Ring		1	1	0	52.14	52.17	0.03	0
1.71308e+09	52.17	1	Ring		1	1	0	52.17	52.2	0.03	0
1.71308e+09	52.2	1	Ring		1	1	0	52.2	52.23	0.03	0
1.71308e+09	52.23	1	Ring		1	1	0	52.23	52.28	0.05	0
1.71308e+09	52.28	1	Ring		1	1	0	52.28	52.31	0.03	0
1.71308e+09	52.31	1	Ring		1	1	0	52.31	52.34	0.03	0
1.71308e+09	52.34	1	Ring		1	1	0	52.34	52.39	0.05	0
1.71308e+09	52.39	1	Ring		1	1	0	52.39	52.42	0.03	0
1.71308e+09	52.42	1	Ring		1	1	0	52.42	52.45	0.03	0
1.71308e+09	52.45	1	Ring		1	1	0	52.45	52.48	0.03	0
1.71308e+09	52.48	1	Ring		1	1	0	52.48	52.53	0.05	0
1.71308e+09	52.53	1	Ring		1	1	0	52.53	52.56	0.03	0
1.71308e+09	52.56	1	Ring		1	1	0	52.56	52.59	0.03	0
1.71308e+09	52.59	1	Ring		1	1	0	52.59	52.63	0.04	0
1.71308e+09	52.63	1	Ring		1	1	0	52.63	52.67	0.04	0
1.71308e+09	52.67	1	Ring		1	1	0	52.67	52.7	0.03	0
1.71308e+09	52.7	1	Ring		1	1	0	52.7	52.73	0.03	0
1.71308e+09	52.73	1	Ring		1	1	0	52.73	52.76	0.03	0
1.71308e+09	52.76	1	Ring		1	1	0	52.76	52.79	0.03	0
1.71308e+09	52.79	1	Ring		1	1	0	52.79	52.82	0.03	0
1.71308e+09	52.82	1	Ring		1	1	0	52.82	52.87	0.05	0
1.71308e+09	52.87	1	Ring		1	1	0	52.87	52.91	0.04	0
1.71308e+09	52.91	1	Ring		1	1	0	52.91	52.94	0.03	0
1.71308e+09	52.94	1	Ring		1	1	0	52.94	52.97	0.03	0
1.71308e+09	52.97	1	Ring		1	1	0	52.97	53.01	0.04	0
1.71308e+09	53.01	1	Ring		1	1	0	53.01	53.04	0.03	0
1.71308e+09	53.04	1	Ring		1	1	0	53.04	53.07	0.03	0
1.71308e+09	53.07	1	Ring		1	1	0	53.07	53.11	0.04	0
1.71308e+09	53.11	1	Ring		1	1	0	53.11	53.14	0.03	0
1.71308e+09	53.14	1	Ring		1	1	0	53.14	53.18	0.04	0
1.71308e+09	53.18	1	Ring		1	1	0	53.18	53.21	0.03	0
1.71308e+09	53.21	1	Ring		1	1	0	53.21	53.24	0.03	0
1.71308e+09	53.24	1	Ring		1	1	0	53.24	53.27	0.03	0
1.71308e+09	53.27	1	Ring		1	1	0	53.27	53.3	0.03	0
1.71308e+09	53.3	1	Ring		1	1	0	53.3	53.33	0.03	0
1.71308e+09	53.33	1	Ring		1	1	0	53.33	53.36	0.03	0
1.71308e+09	53.36	1	Ring		1	1	0	53.36	53.39	0.03	0
1.71308e+09	53.39	1	Ring		1	1	0	53.39	53.43	0.04	0
1.71308e+09	53.43	1	Ring		1	1	0	53.43	53.47	0.04	0
1.71308e+09	53.47	1	Ring		1	1	0	53.47	53.5	0.03	0
1.71308e+09	53.5	1	Ring		1	1	0	53.5	53.53	0.03	0
1.71308e+09	53.53	1	Ring		1	1	0	53.53	53.56	0.03	0
1.71308e+09	53.56	1	Ring		1	1	0	53.56	53.6	0.04	0
1.71308e+09	53.6	1	Ring		1	1	0	53.6	53.63	0.03	0
1.71308e+09	53.63	1	Ring		1	1	0	53.63	53.66	0.03	0
1.71308e+09	53.66	1	Ring		1	1	0	53.66	53.69	0.03	0
1.71308e+09	53.69	1	Ring		1	1	0	53.69	53.72	0.03	0
1.71308e+09	53.72	1	Ring		1	1	0	53.72	53.75	0.03	0
1.71308e+09	53.75	1	Ring		1	1	0	53.75	53.79	0.04	0
1.71308e+09	53.79	1	Ring		1	1	0	53.79	53.82	0.03	0
1.71308e+09	53.82	1	Ring		1	1	0	53.82	53.86	0.04	0
1.71308e+09	53.86	1	Ring		1	1	0	53.86	53.89	0.03	0
1.71308e+09	53.89	1	Ring		1	1	0	53.89	53.92	0.03	0
1.71308e+09	53.92	1	Ring		1	1	0	53.92	53.96	0.04	0
1.71308e+09	53.96	1	Ring		1	1	0	53.96	53.99	0.03	0
1.71308e+09	53.99	1	Ring		1	1	0	53.99	54.02	0.03	0
1.71308e+09	54.02	1	Ring		1	1	0	54.02	54.05	0.03	0
1.71308e+09	54.05	1	Ring		1	1	0	54.05	54.08	0.03	0
1.71308e+09	54.08	1	Ring		1	1	0	54.08	54.11	0.03	0
1.71308e+09	54.11	1	Ring		1	1	0	54.11	54.14	0.03	0
1.71308e+09	54.14	1	Ring		1	1	0	54.14	54.17	0.03	0
1.71308e+09	54.17	1	Ring		1	1	0	54.17	54.2	0.03	0
1.71308e+09	54.2	1	Ring		1	1	0	54.2	54.25	0.05	0
1.71308e+09	54.25	1	Ring		1	1	0	54.25	54.28	0.03	0
1.71308e+09	54.28	1	Ring		1	1	0	54.28	54.31	0.03	0
1.71308e+09	54.31	1	Ring		1	1	0	54.31	54.34	0.03	0
1.71308e+09	54.34	1	Ring		1	1	0	54.34	54.37	0.03	0
1.71308e+09	54.37	1	Ring		1	1	0	54.37	54.4	0.03	0
1.71308e+09	54.4	1	Ring		1	1	0	54.4	54.44	0.04	0
1.71308e+09	54.44	1	Ring		1	1	0	54.44	54.47	0.03	0
1.71308e+09	54.47	1	Ring		1	1	0	54.47	54.5	0.03	0
1.71308e+09	54.5	1	Ring		1	1	0	54.5	54.53	0.03	0
1.71308e+09	54.53	1	Ring		1	1	0	54.53	54.56	0.03	0
1.71308e+09	54.56	1	Ring		1	1	0	54.56	54.59	0.03	0
1.71308e+09	54.59	1	Ring		1	1	0	54.59	54.64	0.05	0
1.71308e+09	54.64	1	Ring		1	1	0	54.64	54.68	0.04	0
1.71308e+09	54.68	1	Ring		1	1	0	54.68	54.73	0.05	0
1.71308e+09	54.73	1	Ring		1	1	0	54.73	54.76	0.03	0
1.71308e+09	54.76	1	Ring		1	1	0	54.76	54.79	0.03	0
1.71308e+09	54.79	1	Ring		1	1	0	54.79	54.82	0.03	0
1.71308e+09	54.82	1	Ring		1	1	0	54.82	54.85	0.03	0
1.71308e+09	54.85	1	Ring		1	1	0	54.85	54.89	0.04	0
1.71308e+09	54.89	1	Ring		1	1	0	54.89	54.92	0.03	0
1.71308e+09	54.92	1	Ring		1	1	0	54.92	54.96	0.04	0
1.71308e+09	54.96	1	Ring		1	1	0	54.96	54.99	0.03	0
1.71308e+09	54.99	1	Ring		1	1	0	54.99	55.03	0.04	0
1.71308e+09	55.03	1	Ring		1	1	0	55.03	55.07	0.04	0
1.71308e+09	55.07	1	Ring		1	1	0	55.07	55.1	0.03	0
1.71308e+09	55.1	1	Ring		1	1	0	55.1	55.13	0.03	0
1.71308e+09	55.13	1	Ring		1	1	0	55.13	55.16	0.03	0
1.71308e+09	55.16	1	Ring		1	1	0	55.16	55.2	0.04	0
1.71308e+09	55.2	1	Ring		1	1	0	55.2	55.23	0.03	0
1.71308e+09	55.23	1	Ring		1	1	0	55.23	55.26	0.03	0
1.71308e+09	55.26	1	Ring		1	1	0	55.26	55.29	0.03	0
1.71308e+09	55.29	1	Ring		1	1	0	55.29	55.32	0.03	0
1.71308e+09	55.32	1	Ring		1	1	0	55.32	55.35	0.03	0
1.71308e+09	55.35	1	Ring		1	1	0	55.35	55.38	0.03	0
1.71308e+09	55.38	1	Ring		1	1	0	55.38	55.41	0.03	0
1.71308e+09	55.41	1	Ring		1	1	0	55.41	55.44	0.03	0
1.71308e+09	55.44	1	Ring		1	1	0	55.44	55.47	0.03	0
1.71308e+09	55.47	1	Ring		1	1	0	55.47	55.5	0.03	0
1.71308e+09	55.5	1	Ring		1	1	0	55.5	55.55	0.05	0
1.71308e+09	55.55	1	Ring		1	1	0	55.55	55.58	0.03	0
1.71308e+09	55.58	1	Ring		1	1	0	55.58	55.61	0.03	0
1.71308e+09	55.61	1	Ring		1	1	0	55.61	55.64	0.03	0
1.71308e+09	55.64	1	Ring		1	1	0	55.64	55.67	0.03	0
1.71308e+09	55.67	1	Ring		1	1	0	55.67	55.7	0.03	0
1.71308e+09	55.7	1	Ring		1	1	0	55.7	55.74	0.04	0
1.71308e+09	55.74	1	Ring		1	1	0	55.74	55.77	0.03	0
1.71308e+09	55.77	1	Ring		1	1	0	55.77	55.8	0.03	0
1.71308e+09	55.8	1	Ring		1	1	0	55.8	55.83	0.03	0
1.71308e+09	55.83	1	Ring		1	1	0	55.83	55.86	0.03	0
1.71308e+09	55.86	1	Ring		1	1	0	55.86	55.9	0.04	0
1.71308e+09	55.9	1	Ring		1	1	0	55.9	55.94	0.04	0
1.71308e+09	55.94	1	Ring		1	1	0	55.94	55.97	0.03	0
1.71308e+09	55.97	1	Ring		1	1	0	55.97	56	0.03	0
1.71308e+09	56	1	Ring		1	1	0	56	56.03	0.03	0
1.71308e+09	56.03	1	Ring		1	1	0	56.03	60.34	4.31	0
1.71308e+09	60.34	1	Ring		1	1	0	60.34	60.37	0.03	0
1.71308e+09	60.37	1	Ring		1	1	0	60.37	60.4	0.03	0
1.71308e+09	60.4	1	Ring		1	1	0	60.4	60.44	0.04	0
1.71308e+09	60.44	1	Ring		1	0	-1	60.44	60.48	0.04	-25
1.71308e+09	60.48	0	Non		0	1	1	60.48	60.52	0.04	25
1.71308e+09	60.52	1	Ring		1	1	0	60.52	60.56	0.04	0
1.71308e+09	60.56	1	Ring		1	1	0	60.56	60.6	0.04	0
1.71308e+09	60.6	1	Ring		1	1	0	60.6	60.64	0.04	0
1.71308e+09	60.64	1	Ring		1	1	0	60.64	60.67	0.03	0
1.71308e+09	60.67	1	Ring		1	1	0	60.67	60.7	0.03	0
1.71308e+09	60.7	1	Ring		1	1	0	60.7	60.73	0.03	0
1.71308e+09	60.73	1	Ring		1	0	-1	60.73	60.77	0.04	-25
1.71308e+09	60.77	0	Non		0	0	0	60.77	60.81	0.04	0
1.71308e+09	60.81	0	Non		0	0	0	60.81	60.86	0.05	0
1.71308e+09	60.86	0	Non		0	1	1	60.86	60.89	0.03	33.3333
1.71308e+09	60.89	1	Ring		1	1	0	60.89	60.94	0.05	0
1.71308e+09	60.94	1	Ring		1	1	0	60.94	60.97	0.03	0
1.71308e+09	60.97	1	Ring		1	1	0	60.97	61	0.03	0
1.71308e+09	61	1	Ring		1	1	0	61	61.03	0.03	0
1.71308e+09	61.03	1	Ring		1	1	0	61.03	61.06	0.03	0
1.71308e+09	61.06	1	Ring		1	1	0	61.06	61.09	0.03	0
1.71308e+09	61.09	1	Ring		1	1	0	61.09	61.12	0.03	0
1.71308e+09	61.12	1	Ring		1	1	0	61.12	61.17	0.05	0
1.71308e+09	61.17	1	Ring		1	1	0	61.17	61.2	0.03	0
1.71308e+09	61.2	1	Ring		1	1	0	61.2	61.23	0.03	0
1.71308e+09	61.23	1	Ring		1	0	-1	61.23	61.26	0.03	-33.3333
1.71308e+09	61.26	0	Non		0	0	0	61.26	61.3	0.04	0
1.71308e+09	61.3	0	Non		0	0	0	61.3	61.33	0.03	0
1.71308e+09	61.33	0	Non		0	1	1	61.33	61.37	0.04	25
1.71308e+09	61.37	1	Ring		1	1	0	61.37	61.4	0.03	0
1.71308e+09	61.4	1	Ring		1	0	-1	61.4	61.44	0.04	-25
1.71308e+09	61.44	0	Non		0	1	1	61.44	61.48	0.04	25
1.71308e+09	61.48	1	Ring		1	1	0	61.48	61.51	0.03	0
1.71308e+09	61.51	1	Ring		1	0	-1	61.51	61.55	0.04	-25
1.71308e+09	61.55	0	Non		0	0	0	61.55	61.58	0.03	0
1.71308e+09	61.58	0	Non		0	0	0	61.58	61.61	0.03	0
1.71308e+09	61.61	0	Non		0	0	0	61.61	61.64	0.03	0
1.71308e+09	61.64	0	Non		0	0	0	61.64	61.69	0.05	0
1.71308e+09	61.69	0	Non		0	0	0	61.69	61.72	0.03	0
1.71308e+09	61.72	0	Non		0	1	1	61.72	61.77	0.05	20
1.71308e+09	61.77	1	Ring		1	0	-1	61.77	61.81	0.04	-25
1.71308e+09	61.81	0	Non		0	1	1	61.81	61.85	0.04	25
1.71308e+09	61.85	1	Ring		1	1	0	61.85	61.89	0.04	0
1.71308e+09	61.89	1	Ring		1	1	0	61.89	61.93	0.04	0
1.71308e+09	61.93	1	Ring		1	0	-1	61.93	61.98	0.05	-20
1.71308e+09	61.98	0	Non		0	0	0	61.98	62.03	0.05	0
1.71308e+09	62.03	0	Non		0	1	1	62.03	62.06	0.03	33.3333
1.71308e+09	62.06	1	Ring		1	1	0	62.06	62.09	0.03	0
1.71308e+09	62.09	1	Ring		1	1	0	62.09	62.14	0.05	0
1.71308e+09	62.14	1	Ring		1	0	-1	62.14	62.18	0.04	-25
1.71308e+09	62.18	0	Non		0	0	0	62.18	62.23	0.05	0
1.71308e+09	62.23	0	Non		0	1	1	62.23	62.26	0.03	33.3333
1.71308e+09	62.26	1	Ring		1	1	0	62.26	62.29	0.03	0
1.71308e+09	62.29	1	Ring		1	1	0	62.29	62.32	0.03	0
1.71308e+09	62.32	1	Ring		1	1	0	62.32	62.37	0.05	0
1.71308e+09	62.37	1	Ring		1	0	-1	62.37	62.41	0.04	-25
1.71308e+09	62.41	0	Non		0	0	0	62.41	62.45	0.04	0
1.71308e+09	62.45	0	Non		0	0	0	62.45	62.49	0.04	0
1.71308e+09	62.49	0	Non		0	1	1	62.49	62.53	0.04	25
1.71308e+09	62.53	1	Ring		1	1	0	62.53	62.56	0.03	0
1.71308e+09	62.56	1	Ring		1	1	0	62.56	62.59	0.03	0
1.71308e+09	62.59	1	Ring		1	0	-1	62.59	62.64	0.05	-20
1.71308e+09	62.64	0	Non		0	0	0	62.64	62.67	0.03	0
1.71308e+09	62.67	0	Non		0	0	0	62.67	62.7	0.03	0
1.71308e+09	62.7	0	Non		0	1	1	62.7	62.73	0.03	33.3333
1.71308e+09	62.73	1	Ring		1	0	-1	62.73	62.77	0.04	-25
1.71308e+09	62.77	0	Non		0	0	0	62.77	62.81	0.04	0
1.71308e+09	62.81	0	Non		0	1	1	62.81	62.86	0.05	20
1.71308e+09	62.86	1	Ring		1	0	-1	62.86	62.9	0.04	-25
1.71308e+09	62.9	0	Non		0	0	0	62.9	62.94	0.04	0
1.71308e+09	62.94	0	Non		0	0	0	62.94	62.97	0.03	0
1.71308e+09	62.97	0	Non		0	0	0	62.97	63	0.03	0
1.71308e+09	63	0	Non		0	1	1	63	63.03	0.03	33.3333
1.71308e+09	63.03	1	Ring		1	0	-1	63.03	63.08	0.05	-20
1.71308e+09	63.08	0	Non		0	0	0	63.08	63.11	0.03	0
1.71308e+09	63.11	0	Non		0	0	0	63.11	63.16	0.05	0
1.71308e+09	63.16	0	Non		0	0	0	63.16	63.2	0.04	0
1.71308e+09	63.2	0	Non		0	0	0	63.2	63.25	0.05	0
1.71308e+09	63.25	0	Non		0	0	0	63.25	63.28	0.03	0
1.71308e+09	63.28	0	Non		0	0	0	63.28	63.33	0.05	0
1.71308e+09	63.33	0	Non		0	0	0	63.33	63.36	0.03	0
1.71308e+09	63.36	0	Non		0	0	0	63.36	63.39	0.03	0
1.71308e+09	63.39	0	Non		0	0	0	63.39	63.44	0.05	0
1.71308e+09	63.44	0	Non		0	0	0	63.44	63.48	0.04	0
1.71308e+09	63.48	0	Non		0	0	0	63.48	63.51	0.03	0
1.71308e+09	63.51	0	Non		0	0	0	63.51	63.54	0.03	0
1.71308e+09	63.54	0	Non		0	0	0	63.54	63.57	0.03	0
1.71308e+09	63.57	0	Non		0	0	0	63.57	63.61	0.04	0
1.71308e+09	63.61	0	Non		0	0	0	63.61	63.65	0.04	0
1.71308e+09	63.65	0	Non		0	0	0	63.65	63.7	0.05	0
1.71308e+09	63.7	0	Non		0	0	0	63.7	63.74	0.04	0
1.71308e+09	63.74	0	Non		0	0	0	63.74	63.78	0.04	0
1.71308e+09	63.78	0	Non		0	0	0	63.78	63.82	0.04	0
1.71308e+09	63.82	0	Non		0	0	0	63.82	63.85	0.03	0
1.71308e+09	63.85	0	Non		0	0	0	63.85	63.89	0.04	0
1.71308e+09	63.89	0	Non		0	0	0	63.89	63.93	0.04	0
1.71308e+09	63.93	0	Non		0	0	0	63.93	63.97	0.04	0
1.71308e+09	63.97	0	Non		0	0	0	63.97	64.01	0.04	0
1.71308e+09	64.01	0	Non		0	0	0	64.01	64.06	0.05	0
1.71308e+09	64.06	0	Non		0	0	0	64.06	64.09	0.03	0
1.71308e+09	64.09	0	Non		0	0	0	64.09	64.14	0.05	0
1.71308e+09	64.14	0	Non		0	0	0	64.14	64.17	0.03	0
1.71308e+09	64.17	0	Non		0	0	0	64.17	64.21	0.04	0
1.71308e+09	64.21	0	Non		0	0	0	64.21	64.25	0.04	0
1.71308e+09	64.25	0	Non		0	0	0	64.25	64.3	0.05	0
1.71308e+09	64.3	0	Non		0	0	0	64.3	64.34	0.04	0
1.71308e+09	64.34	0	Non		0	0	0	64.34	64.37	0.03	0
1.71308e+09	64.37	0	Non		0	0	0	64.37	64.42	0.05	0
1.71308e+09	64.42	0	Non		0	0	0	64.42	64.45	0.03	0
1.71308e+09	64.45	0	Non		0	0	0	64.45	64.48	0.03	0
1.71308e+09	64.48	0	Non		0	0	0	64.48	64.51	0.03	0
1.71308e+09	64.51	0	Non		0	0	0	64.51	64.56	0.05	0
1.71308e+09	64.56	0	Non		0	0	0	64.56	64.59	0.03	0
1.71308e+09	64.59	0	Non		0	0	0	64.59	64.64	0.05	0
1.71308e+09	64.64	0	Non		0	0	0	64.64	64.68	0.04	0
1.71308e+09	64.68	0	Non		0	0	0	64.68	64.73	0.05	0
1.71308e+09	64.73	0	Non		0	0	0	64.73	64.76	0.03	0
1.71308e+09	64.76	0	Non		0	0	0	64.76	64.79	0.03	0
1.71308e+09	64.79	0	Non		0	0	0	64.79	64.84	0.05	0
1.71308e+09	64.84	0	Non		0	0	0	64.84	64.89	0.05	0
1.71308e+09	64.89	0	Non		0	0	0	64.89	64.93	0.04	0
1.71308e+09	64.93	0	Non		0	0	0	64.93	64.96	0.03	0
1.71308e+09	64.96	0	Non		0	0	0	64.96	65	0.04	0
1.71308e+09	65	0	Non		0	0	0	65	65.04	0.04	0
1.71308e+09	65.04	0	Non		0	0	0	65.04	65.08	0.04	0
1.71308e+09	65.08	0	Non		0	0	0	65.08	65.12	0.04	0
1.71308e+09	65.12	0	Non		0	0	0	65.12	65.17	0.05	0
1.71308e+09	65.17	0	Non		0	0	0	65.17	65.2	0.03	0
1.71308e+09	65.2	0	Non		0	0	0	65.2	65.25	0.05	0
1.71308e+09	65.25	0	Non		0	0	0	65.25	65.28	0.03	0
1.71308e+09	65.28	0	Non		0	0	0	65.28	65.32	0.04	0
1.71308e+09	65.32	0	Non		0	0	0	65.32	65.37	0.05	0
1.71308e+09	65.37	0	Non		0	0	0	65.37	65.4	0.03	0
1.71308e+09	65.4	0	Non		0	0	0	65.4	65.45	0.05	0
1.71308e+09	65.45	0	Non		0	0	0	65.45	65.49	0.04	0
1.71308e+09	65.49	0	Non		0	0	0	65.49	65.54	0.05	0
1.71308e+09	65.54	0	Non		0	0	0	65.54	65.59	0.05	0
1.71308e+09	65.59	0	Non		0	0	0	65.59	65.63	0.04	0
1.71308e+09	65.63	0	Non		0	0	0	65.63	65.67	0.04	0
1.71308e+09	65.67	0	Non		0	0	0	65.67	65.71	0.04	0
1.71308e+09	65.71	0	Non		0	0	0	65.71	65.74	0.03	0
1.71308e+09	65.74	0	Non		0	0	0	65.74	65.79	0.05	0
1.71308e+09	65.79	0	Non		0	0	0	65.79	65.82	0.03	0
1.71308e+09	65.82	0	Non		0	0	0	65.82	65.87	0.05	0
1.71308e+09	65.87	0	Non		0	0	0	65.87	65.92	0.05	0
1.71308e+09	65.92	0	Non		0	0	0	65.92	65.96	0.04	0
1.71308e+09	65.96	0	Non		0	0	0	65.96	65.99	0.03	0
1.71308e+09	65.99	0	Non		0	0	0	65.99	66.04	0.05	0
1.71308e+09	66.04	0	Non		0	0	0	66.04	66.07	0.03	0
1.71308e+09	66.07	0	Non		0	0	0	66.07	66.12	0.05	0
1.71308e+09	66.12	0	Non		0	0	0	66.12	66.17	0.05	0
1.71308e+09	66.17	0	Non		0	0	0	66.17	66.2	0.03	0
1.71308e+09	66.2	0	Non		0	0	0	66.2	66.24	0.04	0
1.71308e+09	66.24	0	Non		0	0	0	66.24	66.3	0.06	0
1.71308e+09	66.3	0	Non		0	0	0	66.3	66.34	0.04	0
1.71308e+09	66.34	0	Non		0	0	0	66.34	66.38	0.04	0
1.71308e+09	66.38	0	Non		0	0	0	66.38	66.43	0.05	0
1.71308e+09	66.43	0	Non		0	0	0	66.43	66.46	0.03	0
1.71308e+09	66.46	0	Non		0	0	0	66.46	66.49	0.03	0
1.71308e+09	66.49	0	Non		0	0	0	66.49	66.54	0.05	0
1.71308e+09	66.54	0	Non		0	0	0	66.54	66.57	0.03	0
1.71308e+09	66.57	0	Non		0	0	0	66.57	66.62	0.05	0
1.71308e+09	66.62	0	Non		0	0	0	66.62	66.66	0.04	0
1.71308e+09	66.66	0	Non		0	0	0	66.66	66.69	0.03	0
1.71308e+09	66.69	0	Non		0	0	0	66.69	66.73	0.04	0
1.71308e+09	66.73	0	Non		0	0	0	66.73	66.77	0.04	0
1.71308e+09	66.77	0	Non		0	0	0	66.77	66.82	0.05	0
1.71308e+09	66.82	0	Non		0	0	0	66.82	66.86	0.04	0
1.71308e+09	66.86	0	Non		0	0	0	66.86	66.89	0.03	0
1.71308e+09	66.89	0	Non		0	0	0	66.89	66.93	0.04	0
1.71308e+09	66.93	0	Non		0	0	0	66.93	66.97	0.04	0
1.71308e+09	66.97	0	Non		0	0	0	66.97	67.01	0.04	0
1.71308e+09	67.01	0	Non		0	0	0	67.01	67.04	0.03	0
1.71308e+09	67.04	0	Non		0	0	0	67.04	67.07	0.03	0
1.71308e+09	67.07	0	Non		0	0	0	67.07	67.11	0.04	0
1.71308e+09	67.11	0	Non		0	0	0	67.11	67.15	0.04	0
1.71308e+09	67.15	0	Non		0	0	0	67.15	67.18	0.03	0
1.71308e+09	67.18	0	Non		0	0	0	67.18	67.21	0.03	0
1.71308e+09	67.21	0	Non		0	0	0	67.21	67.25	0.04	0
1.71308e+09	67.25	0	Non		0	0	0	67.25	67.29	0.04	0
1.71308e+09	67.29	0	Non		0	0	0	67.29	67.33	0.04	0
1.71308e+09	67.33	0	Non		0	0	0	67.33	67.36	0.03	0
1.71308e+09	67.36	0	Non		0	0	0	67.36	67.39	0.03	0
1.71308e+09	67.39	0	Non		0	0	0	67.39	67.43	0.04	0
1.71308e+09	67.43	0	Non		0	0	0	67.43	67.46	0.03	0
1.71308e+09	67.46	0	Non		0	0	0	67.46	67.5	0.04	0
1.71308e+09	67.5	0	Non		0	0	0	67.5	67.54	0.04	0
1.71308e+09	67.54	0	Non		0	0	0	67.54	67.57	0.03	0
1.71308e+09	67.57	0	Non		0	0	0	67.57	67.61	0.04	0
1.71308e+09	67.61	0	Non		0	0	0	67.61	67.64	0.03	0
1.71308e+09	67.64	0	Non		0	0	0	67.64	67.68	0.04	0
1.71308e+09	67.68	0	Non		0	0	0	67.68	67.72	0.04	0
1.71308e+09	67.72	0	Non		0	0	0	67.72	67.75	0.03	0
1.71308e+09	67.75	0	Non		0	0	0	67.75	67.79	0.04	0
1.71308e+09	67.79	0	Non		0	0	0	67.79	67.83	0.04	0
1.71308e+09	67.83	0	Non		0	0	0	67.83	67.86	0.03	0
1.71308e+09	67.86	0	Non		0	0	0	67.86	67.89	0.03	0
1.71308e+09	67.89	0	Non		0	0	0	67.89	67.93	0.04	0
1.71308e+09	67.93	0	Non		0	0	0	67.93	67.97	0.04	0
1.71308e+09	67.97	0	Non		0	0	0	67.97	68.01	0.04	0
1.71308e+09	68.01	0	Non		0	0	0	68.01	68.05	0.04	0
1.71308e+09	68.05	0	Non		0	0	0	68.05	68.1	0.05	0
1.71308e+09	68.1	0	Non		0	0	0	68.1	68.13	0.03	0
1.71308e+09	68.13	0	Non		0	0	0	68.13	68.16	0.03	0
1.71308e+09	68.16	0	Non		0	0	0	68.16	68.21	0.05	0
1.71308e+09	68.21	0	Non		0	0	0	68.21	68.26	0.05	0
1.71308e+09	68.26	0	Non		0	0	0	68.26	68.3	0.04	0
1.71308e+09	68.3	0	Non		0	0	0	68.3	68.33	0.03	0
1.71308e+09	68.33	0	Non		0	0	0	68.33	68.38	0.05	0
1.71308e+09	68.38	0	Non		0	0	0	68.38	68.42	0.04	0
1.71308e+09	68.42	0	Non		0	0	0	68.42	68.45	0.03	0
1.71308e+09	68.45	0	Non		0	0	0	68.45	68.49	0.04	0
1.71308e+09	68.49	0	Non		0	0	0	68.49	68.52	0.03	0
1.71308e+09	68.52	0	Non		0	0	0	68.52	68.57	0.05	0
1.71308e+09	68.57	0	Non		0	0	0	68.57	68.61	0.04	0
1.71308e+09	68.61	0	Non		0	0	0	68.61	68.66	0.05	0
1.71308e+09	68.66	0	Non		0	0	0	68.66	68.71	0.05	0
1.71308e+09	68.71	0	Non		0	0	0	68.71	68.75	0.04	0
1.71308e+09	68.75	0	Non		0	0	0	68.75	68.78	0.03	0
1.71308e+09	68.78	0	Non		0	0	0	68.78	68.81	0.03	0
1.71308e+09	68.81	0	Non		0	0	0	68.81	68.86	0.05	0
1.71308e+09	68.86	0	Non		0	0	0	68.86	68.91	0.05	0
1.71308e+09	68.91	0	Non		0	0	0	68.91	68.94	0.03	0
1.71308e+09	68.94	0	Non		0	1	1	68.94	68.97	0.03	33.3333
1.71308e+09	68.97	1	Ring		1	0	-1	68.97	69	0.03	-33.3333
1.71308e+09	69	0	Non		0	1	1	69	69.05	0.05	20
1.71308e+09	69.05	1	Ring		1	1	0	69.05	69.08	0.03	0
1.71308e+09	69.08	1	Ring		1	0	-1	69.08	69.13	0.05	-20
1.71308e+09	69.13	0	Non		0	0	0	69.13	69.16	0.03	0
1.71308e+09	69.16	0	Non		0	0	0	69.16	69.19	0.03	0
1.71308e+09	69.19	0	Non		0	0	0	69.19	69.24	0.05	0
1.71308e+09	69.24	0	Non		0	0	0	69.24	69.28	0.04	0
1.71308e+09	69.28	0	Non		0	0	0	69.28	69.31	0.03	0
1.71308e+09	69.31	0	Non		0	0	0	69.31	69.36	0.05	0
1.71308e+09	69.36	0	Non		0	0	0	69.36	69.39	0.03	0
1.71308e+09	69.39	0	Non		0	0	0	69.39	69.44	0.05	0
1.71308e+09	69.44	0	Non		0	0	0	69.44	69.48	0.04	0
1.71308e+09	69.48	0	Non		0	0	0	69.48	69.53	0.05	0
1.71308e+09	69.53	0	Non		0	0	0	69.53	69.56	0.03	0
1.71308e+09	69.56	0	Non		0	0	0	69.56	69.61	0.05	0
1.71308e+09	69.61	0	Non		0	0	0	69.61	69.64	0.03	0
1.71308e+09	69.64	0	Non		0	0	0	69.64	69.69	0.05	0
1.71308e+09	69.69	0	Non		0	0	0	69.69	69.73	0.04	0
1.71308e+09	69.73	0	Non		0	0	0	69.73	69.78	0.05	0
1.71308e+09	69.78	0	Non		0	0	0	69.78	69.83	0.05	0
1.71308e+09	69.83	0	Non		0	0	0	69.83	69.87	0.04	0
1.71308e+09	69.87	0	Non		0	0	0	69.87	69.92	0.05	0
1.71308e+09	69.92	0	Non		0	0	0	69.92	69.96	0.04	0
1.71308e+09	69.96	0	Non		0	0	0	69.96	70	0.04	0
1.71308e+09	70	0	Non		0	0	0	70	70.03	0.03	0
1.71308e+09	70.03	0	Non		0	0	0	70.03	70.08	0.05	0
1.71308e+09	70.08	0	Non		0	0	0	70.08	70.11	0.03	0
1.71308e+09	70.11	0	Non		0	0	0	70.11	70.14	0.03	0
1.71308e+09	70.14	0	Non		0	0	0	70.14	70.19	0.05	0
1.71308e+09	70.19	0	Non		0	0	0	70.19	70.23	0.04	0
1.71308e+09	70.23	0	Non		0	0	0	70.23	70.28	0.05	0
1.71308e+09	70.28	0	Non		0	0	0	70.28	70.31	0.03	0
1.71308e+09	70.31	0	Non		0	0	0	70.31	70.36	0.05	0
1.71308e+09	70.36	0	Non		0	0	0	70.36	70.39	0.03	0
1.71308e+09	70.39	0	Non		0	0	0	70.39	70.44	0.05	0
1.71308e+09	70.44	0	Non		0	0	0	70.44	70.47	0.03	0
1.71308e+09	70.47	0	Non		0	0	0	70.47	70.5	0.03	0
1.71308e+09	70.5	0	Non		0	0	0	70.5	70.55	0.05	0
1.71308e+09	70.55	0	Non		0	0	0	70.55	70.59	0.04	0
1.71308e+09	70.59	0	Non		0	0	0	70.59	70.64	0.05	0
1.71308e+09	70.64	0	Non		0	0	0	70.64	70.67	0.03	0
1.71308e+09	70.67	0	Non		0	0	0	70.67	70.72	0.05	0
1.71308e+09	70.72	0	Non		0	0	0	70.72	70.76	0.04	0
1.71308e+09	70.76	0	Non		0	0	0	70.76	70.81	0.05	0
1.71308e+09	70.81	0	Non		0	0	0	70.81	70.85	0.04	0
1.71308e+09	70.85	0	Non		0	0	0	70.85	70.9	0.05	0
1.71308e+09	70.9	0	Non		0	0	0	70.9	70.95	0.05	0
1.71308e+09	70.95	0	Non		0	0	0	70.95	71	0.05	0
1.71308e+09	71	0	Non		0	0	0	71	71.04	0.04	0
1.71308e+09	71.04	0	Non		0	0	0	71.04	71.07	0.03	0
1.71308e+09	71.07	0	Non		0	0	0	71.07	71.12	0.05	0
1.71308e+09	71.12	0	Non		0	0	0	71.12	71.17	0.05	0
1.71308e+09	71.17	0	Non		0	0	0	71.17	71.22	0.05	0
1.71308e+09	71.22	0	Non		0	0	0	71.22	71.26	0.04	0
1.71308e+09	71.26	0	Non		0	1	1	71.26	71.29	0.03	33.3333
1.71308e+09	71.29	1	Ring		1	0	-1	71.29	71.34	0.05	-20
1.71308e+09	71.34	0	Non		0	0	0	71.34	71.39	0.05	0
1.71308e+09	71.39	0	Non		0	0	0	71.39	71.42	0.03	0
1.71308e+09	71.42	0	Non		0	0	0	71.42	71.47	0.05	0
1.71308e+09	71.47	0	Non		0	0	0	71.47	71.51	0.04	0
1.71308e+09	71.51	0	Non		0	1	1	71.51	71.56	0.05	20
1.71308e+09	71.56	1	Ring		1	1	0	71.56	71.6	0.04	0
1.71308e+09	71.6	1	Ring		1	1	0	71.6	71.65	0.05	0
1.71308e+09	71.65	1	Ring		1	1	0	71.65	71.68	0.03	0
1.71308e+09	71.68	1	Ring		1	1	0	71.68	71.73	0.05	0
1.71308e+09	71.73	1	Ring		1	0	-1	71.73	71.77	0.04	-25
1.71308e+09	71.77	0	Non		0	0	0	71.77	71.8	0.03	0
1.71308e+09	71.8	0	Non		0	1	1	71.8	71.84	0.04	25
1.71308e+09	71.84	1	Ring		1	1	0	71.84	71.87	0.03	0
1.71308e+09	71.87	1	Ring		1	1	0	71.87	71.9	0.03	0
1.71308e+09	71.9	1	Ring		1	1	0	71.9	71.93	0.03	0
1.71308e+09	71.93	1	Ring		1	1	0	71.93	71.96	0.03	0
1.71308e+09	71.96	1	Ring		1	1	0	71.96	72.01	0.05	0
1.71308e+09	72.01	1	Ring		1	1	0	72.01	72.05	0.04	0
1.71308e+09	72.05	1	Ring		1	1	0	72.05	72.08	0.03	0
1.71308e+09	72.08	1	Ring		1	1	0	72.08	72.12	0.04	0
1.71308e+09	72.12	1	Ring		1	1	0	72.12	72.14	0.02	0
1.71308e+09	72.14	1	Ring		1	1	0	72.14	72.18	0.04	0
1.71308e+09	72.18	1	Ring		1	1	0	72.18	72.21	0.03	0
1.71308e+09	72.21	1	Ring		1	1	0	72.21	72.24	0.03	0
1.71308e+09	72.24	1	Ring		1	1	0	72.24	72.27	0.03	0
1.71308e+09	72.27	1	Ring		1	1	0	72.27	72.3	0.03	0
1.71308e+09	72.3	1	Ring		1	1	0	72.3	72.33	0.03	0
1.71308e+09	72.33	1	Ring		1	1	0	72.33	72.37	0.04	0
1.71308e+09	72.37	1	Ring		1	1	0	72.37	72.41	0.04	0
1.71308e+09	72.41	1	Ring		1	1	0	72.41	72.46	0.05	0
1.71308e+09	72.46	1	Ring		1	1	0	72.46	72.49	0.03	0
1.71308e+09	72.49	1	Ring		1	1	0	72.49	72.52	0.03	0
1.71308e+09	72.52	1	Ring		1	1	0	72.52	72.55	0.03	0
1.71308e+09	72.55	1	Ring		1	1	0	72.55	72.59	0.04	0
1.71308e+09	72.59	1	Ring		1	1	0	72.59	72.62	0.03	0
1.71308e+09	72.62	1	Ring		1	1	0	72.62	72.65	0.03	0
1.71308e+09	72.65	1	Ring		1	1	0	72.65	72.68	0.03	0
1.71308e+09	72.68	1	Ring		1	1	0	72.68	72.71	0.03	0
1.71308e+09	72.71	1	Ring		1	1	0	72.71	72.74	0.03	0
1.71308e+09	72.74	1	Ring		1	1	0	72.74	72.77	0.03	0
1.71308e+09	72.77	1	Ring		1	1	0	72.77	72.81	0.04	0
1.71308e+09	72.81	1	Ring		1	1	0	72.81	72.84	0.03	0
1.71308e+09	72.84	1	Ring		1	1	0	72.84	72.87	0.03	0
1.71308e+09	72.87	1	Ring		1	1	0	72.87	72.9	0.03	0
1.71308e+09	72.9	1	Ring		1	1	0	72.9	72.93	0.03	0
1.71308e+09	72.93	1	Ring		1	1	0	72.93	72.96	0.03	0
1.71308e+09	72.96	1	Ring		1	1	0	72.96	72.99	0.03	0
1.71308e+09	72.99	1	Ring		1	1	0	72.99	73.02	0.03	0
1.71308e+09	73.02	1	Ring		1	1	0	73.02	73.05	0.03	0
1.71308e+09	73.05	1	Ring		1	1	0	73.05	73.09	0.04	0
1.71308e+09	73.09	1	Ring		1	1	0	73.09	73.13	0.04	0
1.71308e+09	73.13	1	Ring		1	1	0	73.13	73.16	0.03	0
1.71308e+09	73.16	1	Ring		1	1	0	73.16	73.2	0.04	0
1.71308e+09	73.2	1	Ring		1	1	0	73.2	73.24	0.04	0
1.71308e+09	73.24	1	Ring		1	1	0	73.24	73.27	0.03	0
1.71308e+09	73.27	1	Ring		1	1	0	73.27	73.3	0.03	0
1.71308e+09	73.3	1	Ring		1	1	0	73.3	73.33	0.03	0
1.71308e+09	73.33	1	Ring		1	1	0	73.33	73.36	0.03	0
1.71308e+09	73.36	1	Ring		1	1	0	73.36	73.39	0.03	0
1.71308e+09	73.39	1	Ring		1	1	0	73.39	73.43	0.04	0
1.71308e+09	73.43	1	Ring		1	1	0	73.43	73.46	0.03	0
1.71308e+09	73.46	1	Ring		1	1	0	73.46	73.49	0.03	0
1.71308e+09	73.49	1	Ring		1	1	0	73.49	73.53	0.04	0
1.71308e+09	73.53	1	Ring		1	1	0	73.53	73.56	0.03	0
1.71308e+09	73.56	1	Ring		1	1	0	73.56	73.6	0.04	0
1.71308e+09	73.6	1	Ring		1	1	0	73.6	73.63	0.03	0
1.71308e+09	73.63	1	Ring		1	1	0	73.63	73.66	0.03	0
1.71308e+09	73.66	1	Ring		1	1	0	73.66	73.69	0.03	0
1.71308e+09	73.69	1	Ring		1	1	0	73.69	73.72	0.03	0
1.71308e+09	73.72	1	Ring		1	1	0	73.72	73.77	0.05	0
1.71308e+09	73.77	1	Ring		1	1	0	73.77	73.8	0.03	0
1.71308e+09	73.8	1	Ring		1	1	0	73.8	73.83	0.03	0
1.71308e+09	73.83	1	Ring		1	1	0	73.83	73.86	0.03	0
1.71308e+09	73.86	1	Ring		1	1	0	73.86	73.89	0.03	0
1.71308e+09	73.89	1	Ring		1	1	0	73.89	73.93	0.04	0
1.71308e+09	73.93	1	Ring		1	1	0	73.93	73.97	0.04	0
1.71308e+09	73.97	1	Ring		1	1	0	73.97	74	0.03	0
1.71308e+09	74	1	Ring		1	1	0	74	74.03	0.03	0
1.71308e+09	74.03	1	Ring		1	1	0	74.03	74.06	0.03	0
1.71308e+09	74.06	1	Ring		1	1	0	74.06	74.09	0.03	0
1.71308e+09	74.09	1	Ring		1	1	0	74.09	74.12	0.03	0
1.71308e+09	74.12	1	Ring		1	1	0	74.12	74.16	0.04	0
1.71308e+09	74.16	1	Ring		1	1	0	74.16	74.19	0.03	0
1.71308e+09	74.19	1	Ring		1	1	0	74.19	74.22	0.03	0
1.71308e+09	74.22	1	Ring		1	1	0	74.22	74.25	0.03	0
1.71308e+09	74.25	1	Ring		1	1	0	74.25	74.3	0.05	0
1.71308e+09	74.3	1	Ring		1	1	0	74.3	74.33	0.03	0
1.71308e+09	74.33	1	Ring		1	1	0	74.33	74.37	0.04	0
1.71308e+09	74.37	1	Ring		1	1	0	74.37	74.41	0.04	0
1.71308e+09	74.41	1	Ring		1	1	0	74.41	74.44	0.03	0
1.71308e+09	74.44	1	Ring		1	1	0	74.44	74.47	0.03	0
1.71308e+09	74.47	1	Ring		1	1	0	74.47	74.5	0.03	0
1.71308e+09	74.5	1	Ring		1	1	0	74.5	74.53	0.03	0
1.71308e+09	74.53	1	Ring		1	1	0	74.53	74.56	0.03	0
1.71308e+09	74.56	1	Ring		1	1	0	74.56	74.59	0.03	0
1.71308e+09	74.59	1	Ring		1	1	0	74.59	74.63	0.04	0
1.71308e+09	74.63	1	Ring		1	1	0	74.63	74.66	0.03	0
1.71308e+09	74.66	1	Ring		1	1	0	74.66	74.7	0.04	0
1.71308e+09	74.7	1	Ring		1	1	0	74.7	74.73	0.03	0
1.71308e+09	74.73	1	Ring		1	1	0	74.73	74.76	0.03	0
1.71308e+09	74.76	1	Ring		1	1	0	74.76	74.79	0.03	0
1.71308e+09	74.79	1	Ring		1	1	0	74.79	74.83	0.04	0
1.71308e+09	74.83	1	Ring		1	1	0	74.83	74.86	0.03	0
1.71308e+09	74.86	1	Ring		1	1	0	74.86	74.89	0.03	0
1.71308e+09	74.89	1	Ring		1	1	0	74.89	74.94	0.05	0
1.71308e+09	74.94	1	Ring		1	1	0	74.94	74.97	0.03	0
1.71308e+09	74.97	1	Ring		1	1	0	74.97	75	0.03	0
1.71308e+09	75	1	Ring		1	1	0	75	75.03	0.03	0
1.71308e+09	75.03	1	Ring		1	1	0	75.03	75.06	0.03	0
1.71308e+09	75.06	1	Ring		1	1	0	75.06	75.1	0.04	0
1.71308e+09	75.1	1	Ring		1	1	0	75.1	75.14	0.04	0
1.71308e+09	75.14	1	Ring		1	1	0	75.14	75.17	0.03	0
1.71308e+09	75.17	1	Ring		1	1	0	75.17	75.2	0.03	0
1.71308e+09	75.2	1	Ring		1	1	0	75.2	75.23	0.03	0
1.71308e+09	75.23	1	Ring		1	1	0	75.23	75.26	0.03	0
1.71308e+09	75.26	1	Ring		1	1	0	75.26	75.3	0.04	0
1.71308e+09	75.3	1	Ring		1	1	0	75.3	75.32	0.02	0
1.71308e+09	75.32	1	Ring		1	1	0	75.32	75.36	0.04	0
1.71308e+09	75.36	1	Ring		1	1	0	75.36	75.39	0.03	0
1.71308e+09	75.39	1	Ring		1	1	0	75.39	75.42	0.03	0
1.71308e+09	75.42	1	Ring		1	1	0	75.42	75.45	0.03	0
1.71308e+09	75.45	1	Ring		1	1	0	75.45	75.5	0.05	0
1.71308e+09	75.5	1	Ring		1	1	0	75.5	75.54	0.04	0
1.71308e+09	75.54	1	Ring		1	1	0	75.54	75.58	0.04	0
1.71308e+09	75.58	1	Ring		1	1	0	75.58	75.61	0.03	0
1.71308e+09	75.61	1	Ring		1	1	0	75.61	75.64	0.03	0
1.71308e+09	75.64	1	Ring		1	1	0	75.64	75.67	0.03	0
1.71308e+09	75.67	1	Ring		1	1	0	75.67	75.7	0.03	0
1.71308e+09	75.7	1	Ring		1	1	0	75.7	75.73	0.03	0
1.71308e+09	75.73	1	Ring		1	1	0	75.73	75.76	0.03	0
1.71308e+09	75.76	1	Ring		1	1	0	75.76	75.79	0.03	0
1.71308e+09	75.79	1	Ring		1	1	0	75.79	75.82	0.03	0
1.71308e+09	75.82	1	Ring		1	1	0	75.82	75.85	0.03	0
1.71308e+09	75.85	1	Ring		1	1	0	75.85	75.9	0.05	0
1.71308e+09	75.9	1	Ring		1	1	0	75.9	75.93	0.03	0
1.71308e+09	75.93	1	Ring		1	1	0	75.93	75.96	0.03	0
1.71308e+09	75.96	1	Ring		1	1	0	75.96	75.99	0.03	0
1.71308e+09	75.99	1	Ring		1	1	0	75.99	76.03	0.04	0
1.71308e+09	76.03	1	Ring		1	1	0	76.03	76.06	0.03	0
1.71308e+09	76.06	1	Ring		1	1	0	76.06	76.1	0.04	0
1.71308e+09	76.1	1	Ring		1	1	0	76.1	76.13	0.03	0
1.71308e+09	76.13	1	Ring		1	1	0	76.13	76.17	0.04	0
1.71308e+09	76.17	1	Ring		1	1	0	76.17	76.2	0.03	0
1.71308e+09	76.2	1	Ring		1	1	0	76.2	76.23	0.03	0
1.71308e+09	76.23	1	Ring		1	1	0	76.23	76.26	0.03	0
1.71308e+09	76.26	1	Ring		1	1	0	76.26	76.3	0.04	0
1.71308e+09	76.3	1	Ring		1	1	0	76.3	76.34	0.04	0
1.71308e+09	76.34	1	Ring		1	1	0	76.34	76.37	0.03	0
1.71308e+09	76.37	1	Ring		1	1	0	76.37	76.41	0.04	0
1.71308e+09	76.41	1	Ring		1	1	0	76.41	76.44	0.03	0
1.71308e+09	76.44	1	Ring		1	1	0	76.44	76.48	0.04	0
1.71308e+09	76.48	1	Ring		1	1	0	76.48	76.51	0.03	0
1.71308e+09	76.51	1	Ring		1	1	0	76.51	76.54	0.03	0
1.71308e+09	76.54	1	Ring		1	1	0	76.54	76.57	0.03	0
1.71308e+09	76.57	1	Ring		1	1	0	76.57	76.6	0.03	0
1.71308e+09	76.6	1	Ring		1	1	0	76.6	76.63	0.03	0
1.71308e+09	76.63	1	Ring		1	1	0	76.63	76.66	0.03	0
1.71308e+09	76.66	1	Ring		1	1	0	76.66	76.7	0.04	0
1.71308e+09	76.7	1	Ring		1	1	0	76.7	76.74	0.04	0
1.71308e+09	76.74	1	Ring		1	1	0	76.74	76.77	0.03	0
1.71308e+09	76.77	1	Ring		1	1	0	76.77	76.8	0.03	0
1.71308e+09	76.8	1	Ring		1	0	-1	76.8	81.12	4.32	-0.231481
1.71308e+09	81.12	0	Non		0	0	0	81.12	81.16	0.04	0
1.71308e+09	81.16	0	Non		0	0	0	81.16	81.21	0.05	0
1.71308e+09	81.21	0	Non		0	0	0	81.21	81.24	0.03	0
1.71308e+09	81.24	0	Non		0	0	0	81.24	81.27	0.03	0
1.71308e+09	81.27	0	Non		0	0	0	81.27	81.3	0.03	0
1.71308e+09	81.3	0	Non		0	0	0	81.3	81.33	0.03	0
1.71308e+09	81.33	0	Non		0	0	0	81.33	81.36	0.03	0
1.71308e+09	81.36	0	Non		0	1	1	81.36	81.39	0.03	33.3333
1.71308e+09	81.39	1	Ring		1	1	0	81.39	81.43	0.04	0
1.71308e+09	81.43	1	Ring		1	0	-1	81.43	81.46	0.03	-33.3333
1.71308e+09	81.46	0	Non		0	1	1	81.46	81.49	0.03	33.3333
1.71308e+09	81.49	1	Ring		1	0	-1	81.49	81.52	0.03	-33.3333
1.71308e+09	81.52	0	Non		0	0	0	81.52	81.56	0.04	0
1.71308e+09	81.56	0	Non		0	0	0	81.56	81.6	0.04	0
1.71308e+09	81.6	0	Non		0	0	0	81.6	81.63	0.03	0
1.71308e+09	81.63	0	Non		0	0	0	81.63	81.66	0.03	0
1.71308e+09	81.66	0	Non		0	0	0	81.66	81.69	0.03	0
1.71308e+09	81.69	0	Non		0	0	0	81.69	81.72	0.03	0
1.71308e+09	81.72	0	Non		0	1	1	81.72	81.77	0.05	20
1.71308e+09	81.77	1	Ring		1	1	0	81.77	81.8	0.03	0
1.71308e+09	81.8	1	Ring		1	1	0	81.8	81.83	0.03	0
1.71308e+09	81.83	1	Ring		1	1	0	81.83	81.86	0.03	0
1.71308e+09	81.86	1	Ring		1	1	0	81.86	81.89	0.03	0
1.71308e+09	81.89	1	Ring		1	0	-1	81.89	81.94	0.05	-20
1.71308e+09	81.94	0	Non		0	1	1	81.94	81.98	0.04	25
1.71308e+09	81.98	1	Ring		1	1	0	81.98	82.02	0.04	0
1.71308e+09	82.02	1	Ring		1	1	0	82.02	82.06	0.04	0
1.71308e+09	82.06	1	Ring		1	1	0	82.06	82.1	0.04	0
1.71308e+09	82.1	1	Ring		1	1	0	82.1	82.13	0.03	0
1.71308e+09	82.13	1	Ring		1	1	0	82.13	82.16	0.03	0
1.71308e+09	82.16	1	Ring		1	1	0	82.16	82.19	0.03	0
1.71308e+09	82.19	1	Ring		1	1	0	82.19	82.23	0.04	0
1.71308e+09	82.23	1	Ring		1	1	0	82.23	82.27	0.04	0
1.71308e+09	82.27	1	Ring		1	1	0	82.27	82.29	0.02	0
1.71308e+09	82.29	1	Ring		1	1	0	82.29	82.33	0.04	0
1.71308e+09	82.33	1	Ring		1	1	0	82.33	82.37	0.04	0
1.71308e+09	82.37	1	Ring		1	1	0	82.37	82.42	0.05	0
1.71308e+09	82.42	1	Ring		1	1	0	82.42	82.45	0.03	0
1.71308e+09	82.45	1	Ring		1	1	0	82.45	82.5	0.05	0
1.71308e+09	82.5	1	Ring		1	1	0	82.5	82.53	0.03	0
1.71308e+09	82.53	1	Ring		1	1	0	82.53	82.58	0.05	0
1.71308e+09	82.58	1	Ring		1	1	0	82.58	82.62	0.04	0
1.71308e+09	82.62	1	Ring		1	0	-1	82.62	82.67	0.05	-20
1.71308e+09	82.67	0	Non		0	1	1	82.67	82.7	0.03	33.3333
1.71308e+09	82.7	1	Ring		1	1	0	82.7	82.74	0.04	0
1.71308e+09	82.74	1	Ring		1	1	0	82.74	82.79	0.05	0
1.71308e+09	82.79	1	Ring		1	0	-1	82.79	82.82	0.03	-33.3333
1.71308e+09	82.82	0	Non		0	0	0	82.82	82.87	0.05	0
1.71308e+09	82.87	0	Non		0	0	0	82.87	82.92	0.05	0
1.71308e+09	82.92	0	Non		0	0	0	82.92	82.95	0.03	0
1.71308e+09	82.95	0	Non		0	0	0	82.95	82.98	0.03	0
1.71308e+09	82.98	0	Non		0	0	0	82.98	83.03	0.05	0
1.71308e+09	83.03	0	Non		0	0	0	83.03	83.06	0.03	0
1.71308e+09	83.06	0	Non		0	0	0	83.06	83.1	0.04	0
1.71308e+09	83.1	0	Non		0	0	0	83.1	83.15	0.05	0
1.71308e+09	83.15	0	Non		0	0	0	83.15	83.2	0.05	0
1.71308e+09	83.2	0	Non		0	0	0	83.2	83.24	0.04	0
1.71308e+09	83.24	0	Non		0	0	0	83.24	83.28	0.04	0
1.71308e+09	83.28	0	Non		0	1	1	83.28	83.32	0.04	25
1.71308e+09	83.32	1	Ring		1	0	-1	83.32	83.37	0.05	-20
1.71308e+09	83.37	0	Non		0	0	0	83.37	83.4	0.03	0
1.71308e+09	83.4	0	Non		0	0	0	83.4	83.43	0.03	0
1.71308e+09	83.43	0	Non		0	0	0	83.43	83.48	0.05	0
1.71308e+09	83.48	0	Non		0	0	0	83.48	83.52	0.04	0
1.71308e+09	83.52	0	Non		0	0	0	83.52	83.57	0.05	0
1.71308e+09	83.57	0	Non		0	0	0	83.57	83.6	0.03	0
1.71308e+09	83.6	0	Non		0	0	0	83.6	83.65	0.05	0
1.71308e+09	83.65	0	Non		0	0	0	83.65	83.69	0.04	0
1.71308e+09	83.69	0	Non		0	0	0	83.69	83.72	0.03	0
1.71308e+09	83.72	0	Non		0	0	0	83.72	83.76	0.04	0
1.71308e+09	83.76	0	Non		0	0	0	83.76	83.79	0.03	0
1.71308e+09	83.79	0	Non		0	0	0	83.79	83.82	0.03	0
1.71308e+09	83.82	0	Non		0	0	0	83.82	83.85	0.03	0
1.71308e+09	83.85	0	Non		0	0	0	83.85	83.89	0.04	0
1.71308e+09	83.89	0	Non		0	1	1	83.89	83.93	0.04	25
1.71308e+09	83.93	1	Ring		1	0	-1	83.93	83.98	0.05	-20
1.71308e+09	83.98	0	Non		0	0	0	83.98	84.02	0.04	0
1.71308e+09	84.02	0	Non		0	0	0	84.02	84.05	0.03	0
1.71308e+09	84.05	0	Non		0	0	0	84.05	84.09	0.04	0
1.71308e+09	84.09	0	Non		0	0	0	84.09	84.13	0.04	0
1.71308e+09	84.13	0	Non		0	0	0	84.13	84.16	0.03	0
1.71308e+09	84.16	0	Non		0	0	0	84.16	84.21	0.05	0
1.71308e+09	84.21	0	Non		0	0	0	84.21	84.25	0.04	0
1.71308e+09	84.25	0	Non		0	0	0	84.25	84.29	0.04	0
1.71308e+09	84.29	0	Non		0	0	0	84.29	84.32	0.03	0
1.71308e+09	84.32	0	Non		0	0	0	84.32	84.35	0.03	0
1.71308e+09	84.35	0	Non		0	0	0	84.35	84.38	0.03	0
1.71308e+09	84.38	0	Non		0	0	0	84.38	84.43	0.05	0
1.71308e+09	84.43	0	Non		0	0	0	84.43	84.46	0.03	0
1.71308e+09	84.46	0	Non		0	0	0	84.46	84.49	0.03	0
1.71308e+09	84.49	0	Non		0	0	0	84.49	84.52	0.03	0
1.71308e+09	84.52	0	Non		0	1	1	84.52	84.55	0.03	33.3333
1.71308e+09	84.55	1	Ring		1	0	-1	84.55	84.59	0.04	-25
1.71308e+09	84.59	0	Non		0	0	0	84.59	84.63	0.04	0
1.71308e+09	84.63	0	Non		0	0	0	84.63	84.66	0.03	0
1.71308e+09	84.66	0	Non		0	0	0	84.66	84.7	0.04	0
1.71308e+09	84.7	0	Non		0	0	0	84.7	84.74	0.04	0
1.71308e+09	84.74	0	Non		0	0	0	84.74	84.77	0.03	0
1.71308e+09	84.77	0	Non		0	1	1	84.77	84.81	0.04	25
1.71308e+09	84.81	1	Ring		1	0	-1	84.81	84.85	0.04	-25
1.71308e+09	84.85	0	Non		0	0	0	84.85	84.89	0.04	0
1.71308e+09	84.89	0	Non		0	0	0	84.89	84.93	0.04	0
1.71308e+09	84.93	0	Non		0	0	0	84.93	84.96	0.03	0
1.71308e+09	84.96	0	Non		0	0	0	84.96	84.99	0.03	0
1.71308e+09	84.99	0	Non		0	0	0	84.99	85.04	0.05	0
1.71308e+09	85.04	0	Non		0	1	1	85.04	85.07	0.03	33.3333
1.71308e+09	85.07	1	Ring		1	0	-1	85.07	85.1	0.03	-33.3333
1.71308e+09	85.1	0	Non		0	0	0	85.1	85.13	0.03	0
1.71308e+09	85.13	0	Non		0	0	0	85.13	85.18	0.05	0
1.71308e+09	85.18	0	Non		0	0	0	85.18	85.23	0.05	0
1.71308e+09	85.23	0	Non		0	1	1	85.23	85.27	0.04	25
1.71308e+09	85.27	1	Ring		1	0	-1	85.27	85.3	0.03	-33.3333
1.71308e+09	85.3	0	Non		0	0	0	85.3	85.33	0.03	0
1.71308e+09	85.33	0	Non		0	0	0	85.33	85.36	0.03	0
1.71308e+09	85.36	0	Non		0	0	0	85.36	85.41	0.05	0
1.71308e+09	85.41	0	Non		0	0	0	85.41	85.45	0.04	0
1.71308e+09	85.45	0	Non		0	0	0	85.45	85.5	0.05	0
1.71308e+09	85.5	0	Non		0	0	0	85.5	85.55	0.05	0
1.71308e+09	85.55	0	Non		0	0	0	85.55	85.59	0.04	0
1.71308e+09	85.59	0	Non		0	0	0	85.59	85.63	0.04	0
1.71308e+09	85.63	0	Non		0	0	0	85.63	85.67	0.04	0
1.71308e+09	85.67	0	Non		0	0	0	85.67	85.7	0.03	0
1.71308e+09	85.7	0	Non		0	0	0	85.7	85.75	0.05	0
1.71308e+09	85.75	0	Non		0	0	0	85.75	85.78	0.03	0
1.71308e+09	85.78	0	Non		0	0	0	85.78	85.81	0.03	0
1.71308e+09	85.81	0	Non		0	0	0	85.81	85.84	0.03	0
1.71308e+09	85.84	0	Non		0	0	0	85.84	85.87	0.03	0
1.71308e+09	85.87	0	Non		0	0	0	85.87	85.91	0.04	0
1.71308e+09	85.91	0	Non		0	0	0	85.91	85.95	0.04	0
1.71308e+09	85.95	0	Non		0	0	0	85.95	86	0.05	0
1.71308e+09	86	0	Non		0	0	0	86	86.05	0.05	0
1.71308e+09	86.05	0	Non		0	0	0	86.05	86.09	0.04	0
1.71308e+09	86.09	0	Non		0	0	0	86.09	86.14	0.05	0
1.71308e+09	86.14	0	Non		0	0	0	86.14	86.19	0.05	0
1.71308e+09	86.19	0	Non		0	0	0	86.19	86.23	0.04	0
1.71308e+09	86.23	0	Non		0	0	0	86.23	86.28	0.05	0
1.71308e+09	86.28	0	Non		0	0	0	86.28	86.32	0.04	0
1.71308e+09	86.32	0	Non		0	0	0	86.32	86.36	0.04	0
1.71308e+09	86.36	0	Non		0	0	0	86.36	86.4	0.04	0
1.71308e+09	86.4	0	Non		0	0	0	86.4	86.43	0.03	0
1.71308e+09	86.43	0	Non		0	0	0	86.43	86.46	0.03	0
1.71308e+09	86.46	0	Non		0	0	0	86.46	86.5	0.04	0
1.71308e+09	86.5	0	Non		0	0	0	86.5	86.54	0.04	0
1.71308e+09	86.54	0	Non		0	0	0	86.54	86.59	0.05	0
1.71308e+09	86.59	0	Non		0	0	0	86.59	86.64	0.05	0
1.71308e+09	86.64	0	Non		0	0	0	86.64	86.69	0.05	0
1.71308e+09	86.69	0	Non		0	0	0	86.69	86.73	0.04	0
1.71308e+09	86.73	0	Non		0	0	0	86.73	86.76	0.03	0
1.71308e+09	86.76	0	Non		0	0	0	86.76	86.81	0.05	0
1.71308e+09	86.81	0	Non		0	1	1	86.81	86.84	0.03	33.3333
1.71308e+09	86.84	1	Ring		1	1	0	86.84	86.88	0.04	0
1.71308e+09	86.88	1	Ring		1	1	0	86.88	86.92	0.04	0
1.71308e+09	86.92	1	Ring		1	1	0	86.92	86.97	0.05	0
1.71308e+09	86.97	1	Ring		1	0	-1	86.97	87.01	0.04	-25
1.71308e+09	87.01	0	Non		0	0	0	87.01	87.06	0.05	0
1.71308e+09	87.06	0	Non		0	0	0	87.06	87.11	0.05	0
1.71308e+09	87.11	0	Non		0	0	0	87.11	87.15	0.04	0
1.71308e+09	87.15	0	Non		0	0	0	87.15	87.2	0.05	0
1.71308e+09	87.2	0	Non		0	0	0	87.2	87.23	0.03	0
1.71308e+09	87.23	0	Non		0	1	1	87.23	87.28	0.05	20
1.71308e+09	87.28	1	Ring		1	1	0	87.28	87.31	0.03	0
1.71308e+09	87.31	1	Ring		1	1	0	87.31	87.35	0.04	0
1.71308e+09	87.35	1	Ring		1	1	0	87.35	87.38	0.03	0
1.71308e+09	87.38	1	Ring		1	1	0	87.38	87.42	0.04	0
1.71308e+09	87.42	1	Ring		1	1	0	87.42	87.46	0.04	0
1.71308e+09	87.46	1	Ring		1	0	-1	87.46	87.51	0.05	-20
1.71308e+09	87.51	0	Non		0	1	1	87.51	87.55	0.04	25
1.71308e+09	87.55	1	Ring		1	1	0	87.55	87.59	0.04	0
1.71308e+09	87.59	1	Ring		1	1	0	87.59	87.63	0.04	0
1.71308e+09	87.63	1	Ring		1	1	0	87.63	87.68	0.05	0
1.71308e+09	87.68	1	Ring		1	1	0	87.68	87.71	0.03	0
1.71308e+09	87.71	1	Ring		1	1	0	87.71	87.74	0.03	0
1.71308e+09	87.74	1	Ring		1	1	0	87.74	87.78	0.04	0
1.71308e+09	87.78	1	Ring		1	1	0	87.78	87.83	0.05	0
1.71308e+09	87.83	1	Ring		1	1	0	87.83	87.87	0.04	0
1.71308e+09	87.87	1	Ring		1	1	0	87.87	87.92	0.05	0
1.71308e+09	87.92	1	Ring		1	1	0	87.92	87.96	0.04	0
1.71308e+09	87.96	1	Ring		1	1	0	87.96	88.01	0.05	0
1.71308e+09	88.01	1	Ring		1	0	-1	88.01	88.06	0.05	-20
1.71308e+09	88.06	0	Non		0	1	1	88.06	88.11	0.05	20
1.71308e+09	88.11	1	Ring		1	1	0	88.11	88.14	0.03	0
1.71308e+09	88.14	1	Ring		1	1	0	88.14	88.19	0.05	0
1.71308e+09	88.19	1	Ring		1	1	0	88.19	88.23	0.04	0
1.71308e+09	88.23	1	Ring		1	1	0	88.23	88.26	0.03	0
1.71308e+09	88.26	1	Ring		1	1	0	88.26	88.3	0.04	0
1.71308e+09	88.3	1	Ring		1	1	0	88.3	88.34	0.04	0
1.71308e+09	88.34	1	Ring		1	1	0	88.34	88.39	0.05	0
1.71308e+09	88.39	1	Ring		1	1	0	88.39	88.42	0.03	0
1.71308e+09	88.42	1	Ring		1	1	0	88.42	88.46	0.04	0
1.71308e+09	88.46	1	Ring		1	1	0	88.46	88.49	0.03	0
1.71308e+09	88.49	1	Ring		1	1	0	88.49	88.53	0.04	0
1.71308e+09	88.53	1	Ring		1	1	0	88.53	88.56	0.03	0
1.71308e+09	88.56	1	Ring		1	1	0	88.56	88.61	0.05	0
1.71308e+09	88.61	1	Ring		1	1	0	88.61	88.65	0.04	0
1.71308e+09	88.65	1	Ring		1	1	0	88.65	88.68	0.03	0
1.71308e+09	88.68	1	Ring		1	1	0	88.68	88.72	0.04	0
1.71308e+09	88.72	1	Ring		1	1	0	88.72	88.76	0.04	0
1.71308e+09	88.76	1	Ring		1	1	0	88.76	88.81	0.05	0
1.71308e+09	88.81	1	Ring		1	1	0	88.81	88.86	0.05	0
1.71308e+09	88.86	1	Ring		1	1	0	88.86	88.9	0.04	0
1.71308e+09	88.9	1	Ring		1	1	0	88.9	88.93	0.03	0
1.71308e+09	88.93	1	Ring		1	1	0	88.93	88.98	0.05	0
1.71308e+09	88.98	1	Ring		1	1	0	88.98	89.01	0.03	0
1.71308e+09	89.01	1	Ring		1	1	0	89.01	89.04	0.03	0
1.71308e+09	89.04	1	Ring		1	1	0	89.04	89.08	0.04	0
1.71308e+09	89.08	1	Ring		1	1	0	89.08	89.11	0.03	0
1.71308e+09	89.11	1	Ring		1	1	0	89.11	89.15	0.04	0
1.71308e+09	89.15	1	Ring		1	1	0	89.15	89.18	0.03	0
1.71308e+09	89.18	1	Ring		1	1	0	89.18	89.23	0.05	0
1.71308e+09	89.23	1	Ring		1	1	0	89.23	89.26	0.03	0
1.71308e+09	89.26	1	Ring		1	1	0	89.26	89.29	0.03	0
1.71308e+09	89.29	1	Ring		1	1	0	89.29	89.34	0.05	0
1.71308e+09	89.34	1	Ring		1	1	0	89.34	89.39	0.05	0
1.71308e+09	89.39	1	Ring		1	1	0	89.39	89.42	0.03	0
1.71308e+09	89.42	1	Ring		1	1	0	89.42	89.46	0.04	0
1.71308e+09	89.46	1	Ring		1	1	0	89.46	89.5	0.04	0
1.71308e+09	89.5	1	Ring		1	1	0	89.5	89.53	0.03	0
1.71308e+09	89.53	1	Ring		1	1	0	89.53	89.58	0.05	0
1.71308e+09	89.58	1	Ring		1	1	0	89.58	89.62	0.04	0
1.71308e+09	89.62	1	Ring		1	1	0	89.62	89.67	0.05	0
1.71308e+09	89.67	1	Ring		1	1	0	89.67	89.71	0.04	0
1.71308e+09	89.71	1	Ring		1	1	0	89.71	89.76	0.05	0
1.71308e+09	89.76	1	Ring		1	1	0	89.76	89.81	0.05	0
1.71308e+09	89.81	1	Ring		1	1	0	89.81	89.84	0.03	0
1.71308e+09	89.84	1	Ring		1	1	0	89.84	89.87	0.03	0
1.71308e+09	89.87	1	Ring		1	1	0	89.87	89.91	0.04	0
1.71308e+09	89.91	1	Ring		1	1	0	89.91	89.94	0.03	0
1.71308e+09	89.94	1	Ring		1	1	0	89.94	89.98	0.04	0
1.71308e+09	89.98	1	Ring		1	1	0	89.98	90.01	0.03	0
1.71308e+09	90.01	1	Ring		1	1	0	90.01	90.05	0.04	0
1.71308e+09	90.05	1	Ring		1	1	0	90.05	90.09	0.04	0
[truncated: 8,001 more rows]
